# Supplementary material for: Prognostic and Predictive Value of Immune-Related Gene Expression Signatures vs Tumor-Infiltrating Lymphocytes in Early-Stage ERBB2/HER2-Positive Breast Cancer: A Correlative Analysis of the CALGB 40601 and PAMELA Trials
Source: PubMed Central journal article supplement (PMC9857319; doi:10.1001/jamaoncol.2022.6288), 2023-01-05
Supplement: jamaoncol-e226288-s001.pdf [file jamaoncol-e226288-s001.pdf]

## Supplementary Online Content

Fernandez-Martinez A, Pascual T, Singh B, et al. Prognostic and predictive value of immune-related gene expression signatures vs tumor-infiltrating lymphocytes in early-stage ERBB2/HER2-positive breast cancer: a correlative analysis of the CALGB 40601 and PAMELA trials. *JAMA Oncol*. Published online January 5, 2023. doi:10.1001/jamaoncol.2022.6288

**eFigure 1.** CONSORT Diagram

**eFigure 2.** Distribution of Tumor-Infiltrating Lymphocytes Infiltration by Clinical Trial

**eFigure 3.** Comparison of Stromal Tumor-Infiltrating Lymphocytes (TILs) Levels by Hormone Receptor Status and Intrinsic Subtype in CALGB 40601 and PAMELA

**eFigure 4.** Correlation Between Tumor-Infiltrating Lymphocytes (TILs) Levels and Immune Gene Expression Signatures (iGES)

**eFigure 5.** Association Between the Spearman Correlation Coefficients of Tumor-Infiltrating Lymphocytes (TILs) and Immune Gene Expression Signatures (iGES) in CALGB 40601 and PAMELA

**eFigure 6.** Rates of Pathologic Complete Response (pCR) According to Immune Gene Expression Signature (iGES) Levels

**eFigure 7.** Accuracy Metrics of the Univariable Immune Biomarker Models for Pathologic Complete Response (pCR) Prediction

**eTable 1.** List of Immune Gene Expression Signatures, Signature Class, PMID, and Genes Within a Signature

**eTable 2.** Comparison of Baseline Characteristics of the Patients From the CALGB 40601 Event-Free Survival (EFS) and Landmark Subpopulations

**eTable 3.** Correlation of Tumor-Infiltrating Lymphocytes (TILs) and Immune Gene Expression Signatures (iGES) in CALGB 40601 and PAMELA

**eTable 4.** Association of Tumor-Infiltrating Lymphocytes (TILs) and Immune Gene Expression Signatures (iGES) With Pathologic Complete Response (pCR) in the Combined CALGB 40601 and PAMELA Data Set

**eTable 5.** Association of Tumor-Infiltrating Lymphocytes (TILs) and Immune Gene Expression Signatures (iGES) With Pathologic Complete Response (pCR) in the Presence of Clinical Parameters Using the Combined CALGB 40601 and PAMELA Cohort

**eTable 6.** Accuracy Metrics (Area Under the Curve From the Receiver Operating Characteristic Curves [AUC ROC]) of the Univariable Immune-Biomarker Models to Predict Pathologic Complete Response (pCR)

**eTable 7.** Association of Tumor-Infiltrating Lymphocytes (TILs) and Immune Gene Expression Signatures (iGES) With Event-Free Survival (EFS) in CALGB 40601

**eTable 8.** Association of Tumor-Infiltrating Lymphocytes (TILs) as a Continuous Variable and Immune Gene Expression Signatures (iGES) With Event-Free Survival (EFS) in CALGB 40601

**eTable 9.** Association of Tumor-Infiltrating Lymphocytes (TILs) Using a Cutoff of 40% and Immune Gene Expression Signatures (iGES) With Event-Free Survival (EFS) in CALGB 40601

**eTable 10.** Landmark Analysis Week 30

**eTable 11.** Summary Table of Akaike Information Criteria (AIC) and C-Index From Multivariable Cox Models Including Immune Gene Expression Signatures (iGES)

**eReferences**

This supplementary material has been provided by the authors to give readers additional information about their work.

### eFigure 1. CONSORT Diagram

TILs: Tumor-Infiltrating Lymphocytes; Rx: treatment; QC: quality control; w: weeks.

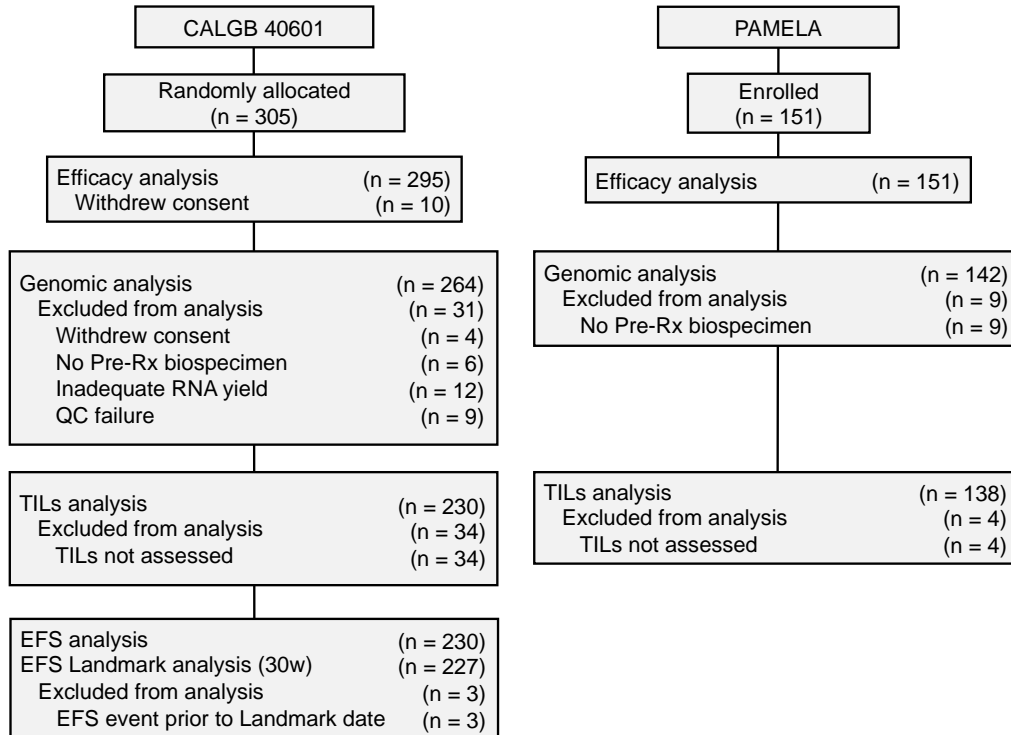

## eFigure 2. Distribution of Tumor-Infiltrating Lymphocytes Infiltration by Clinical Trial

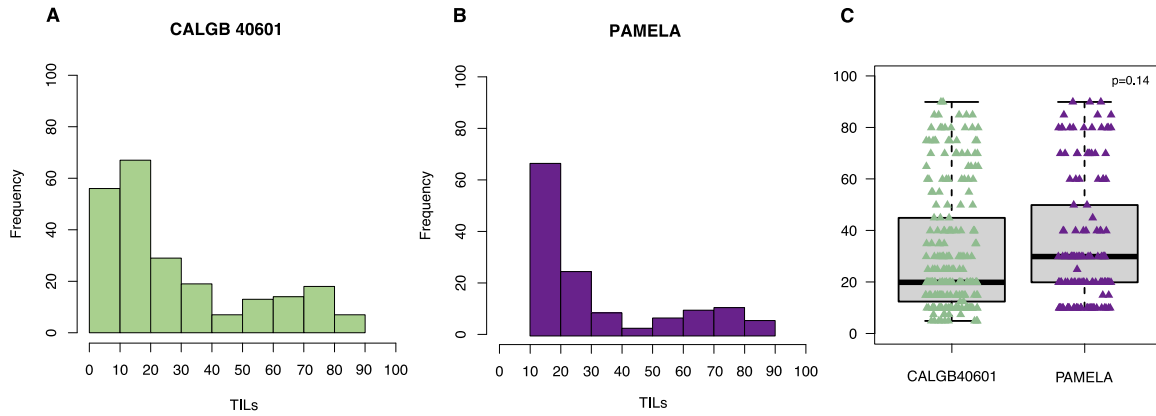

A) Histogram of Tumor-Infiltrating Lymphocytes infiltration levels in CALGB 40601. B) Histogram of Tumor-Infiltrating Lymphocytes infiltration levels in PAMELA. C) Comparison of Tumor-Infiltrating Lymphocytes infiltration levels between both clinical trials. Statistical differences were assessed using an Kruskal Wallis test (P-value at the top of the figure). The horizontal line from the boxplots represents the median of the distribution. TILs: Tumor-Infiltrating Lymphocytes.

**eFigure 3. Comparison of Stromal Tumor-Infiltrating Lymphocytes (TILs) Levels by Hormone Receptor Status and Intrinsic Subtype in CALGB 40601 and PAMELA**

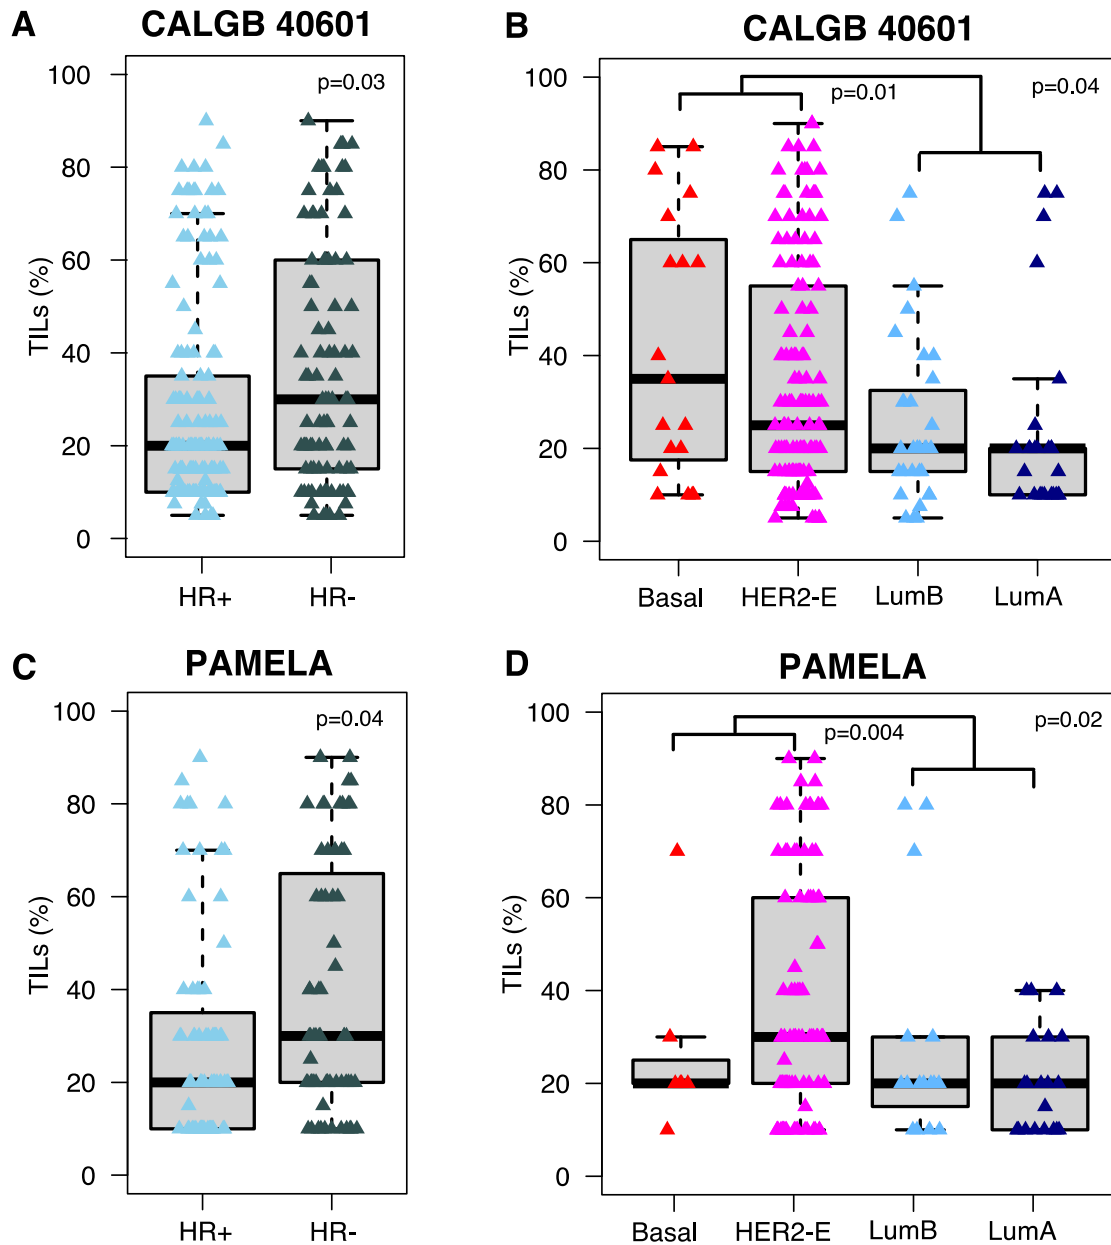

Comparison of stromal Tumor-Infiltrating Lymphocytes (TILs) levels by hormone receptor status and intrinsic subtype in CALGB 40601 (A, B) and PAMELA (C, D) trials. Statistical differences were assessed using an Kruskal Wallis test (P-value at the top of the figure). The horizontal line from the boxplots represents the median of the distribution.

TILs: Tumor-Infiltrating Lymphocytes; HR+: hormone receptor positive; HR-: hormone receptor negative; Basal: basal-like; HER2-E: HER2-Enriched; LumB: luminal B; LumA: luminal A.

## eFigure 4. Correlation Between Tumor-Infiltrating Lymphocytes (TILs) Levels and Immune Gene Expression Signatures (iGES)

**A**

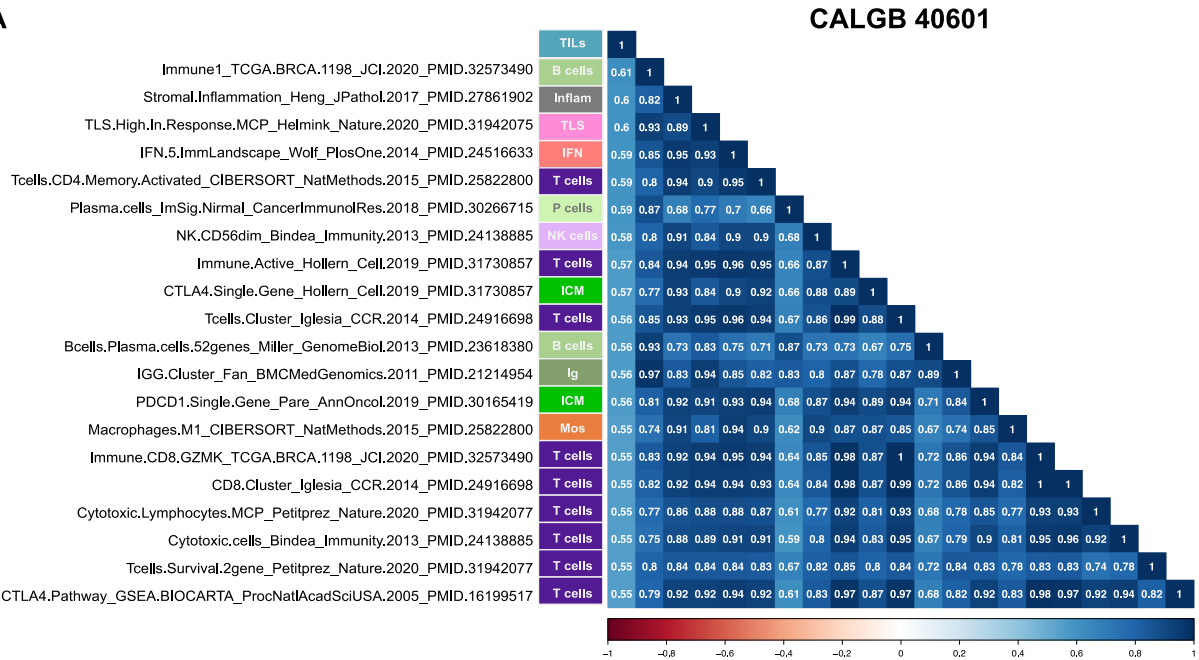

**B**

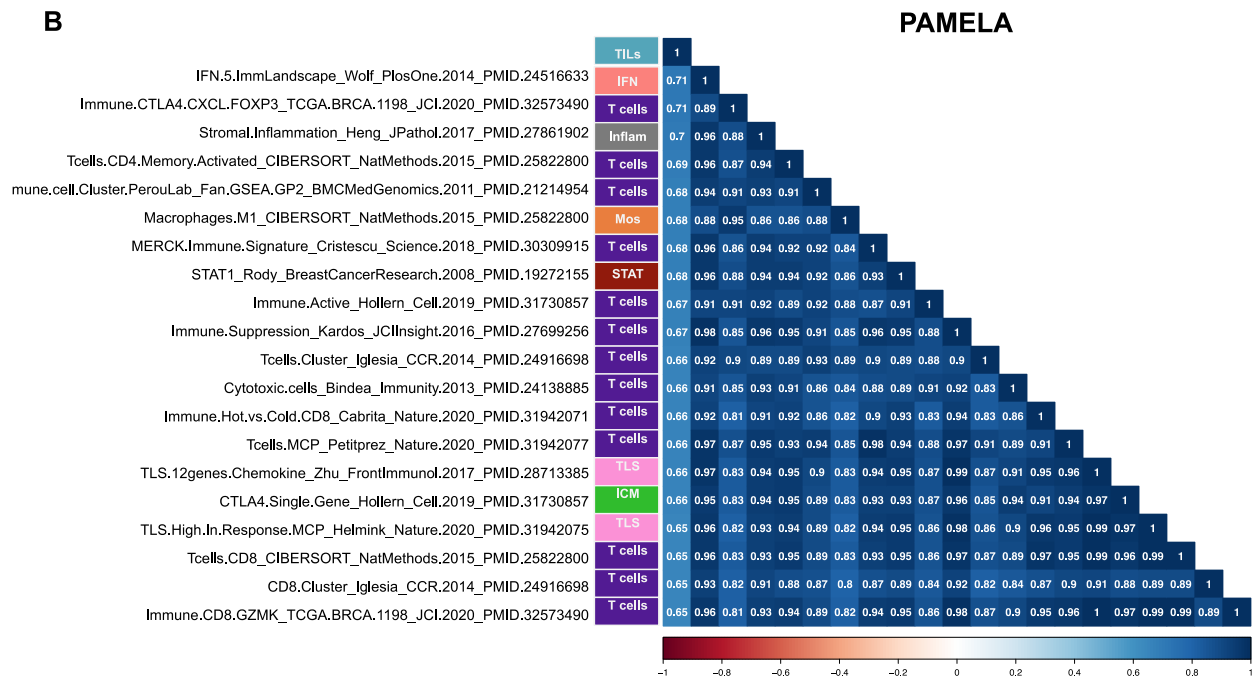

Spearman's Correlations between Tumor-Infiltrating Lymphocytes (TILs) levels and immune gene expression signatures. The 20 signatures with a p-value of 0.05 and the highest correlation coefficients are shown for A) CALGB 40601 and B) PAMELA.

TILs: Tumor-Infiltrating Lymphocytes; Inflam: inflammation; TLS: tertiary lymphoid structures; IFN: interferon; P: plasma; ICM: immune checkpoint molecules; Mos: macrophages; NK: natural killer; Ig: immunoglobulin; STAT: signal transducer and activator of transcription.

**eFigure 5. Association Between the Spearman Correlation Coefficients of Tumor-Infiltrating Lymphocytes (TILs) and Immune Gene Expression Signatures (iGES) in CALGB 40601 and PAMELA.**

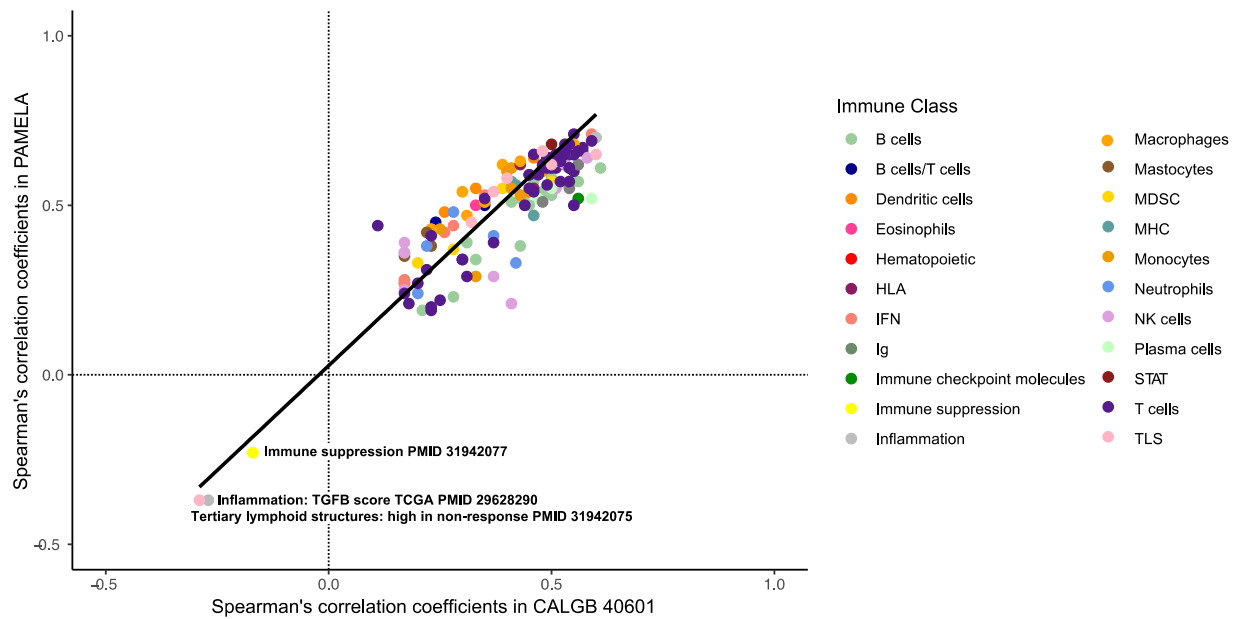

Only the signatures significantly correlated with TILs in both studies (166/202, 81.2%) are represented (adjusted p-value < 0.05).

HLA: human leukocyte antigens; IFN: interferon; Ig: Immunoglobulin; MDSC: myeloid-derived-suppressor cells; MHC: major histocompatibility complex; NK: natural killer; STAT: signal transducer and activator of transcription; TLS: tertiary lymphoid structures.

## eFigure 6. Rates of Pathologic Complete Response (pCR) According to Immune Gene Expression Signature (iGES) Levels

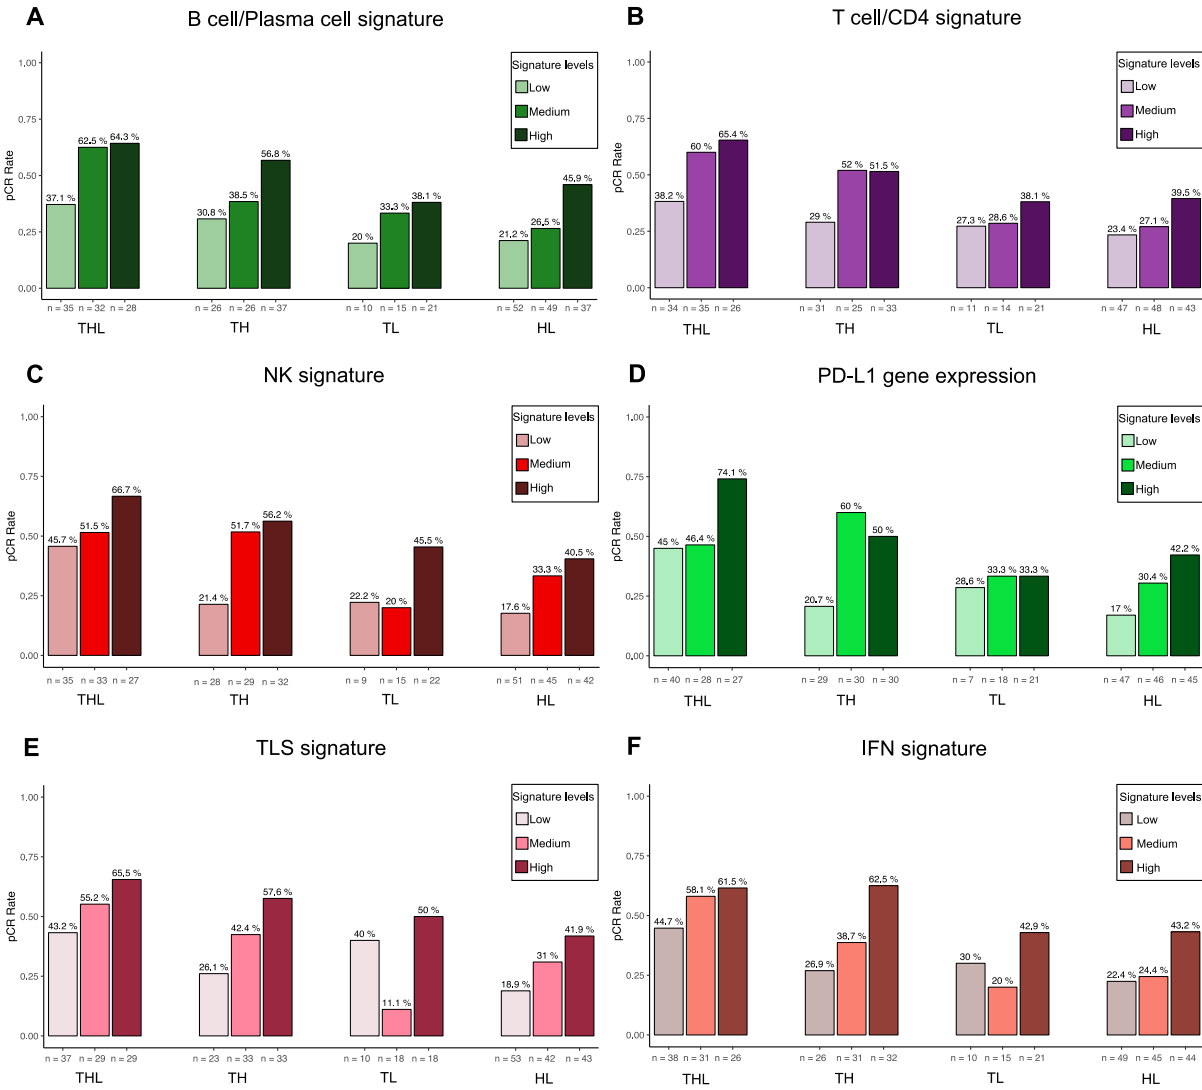

iGES have been divided by tertiles to illustrate their association with pCR rates.

pCR: pathologic complete response; T: weekly paclitaxel; H: trastuzumab; L: lapatinib; NK: natural killer; PD-L1: programmed death-1 ligand 1; TLS: tertiary lymphoid structures; IFN: interferon.

## eFigure 7. Accuracy Metrics of the Univariable Immune Biomarker Models for Pathologic Complete Response (pCR) Prediction

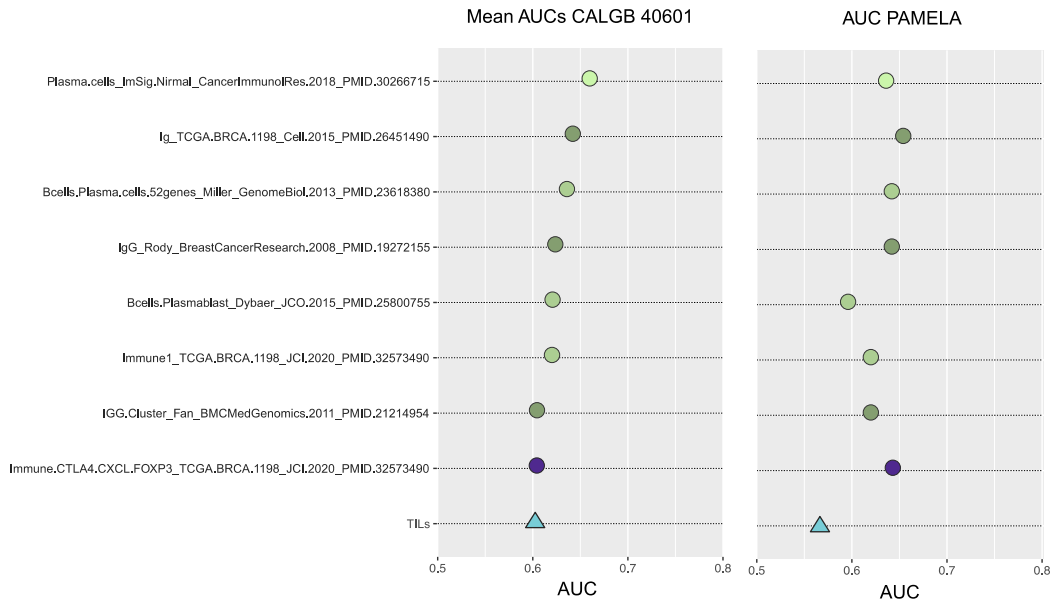

Using CALGB 40601 as training set, the average AUC of the different models was calculated across all the resamples using 10-fold cross validation. A second AUC for the different biomarkers was calculated using PAMELA as an external validation set. The gene expression signatures are represented as circles compared to TILs as continuous variable, that is represented as a triangle. The circle colors represent the immune signature class as shown in eTable 1.

TILs: Tumor-Infiltrating Lymphocytes; AUC: Area under the receiver operating characteristic curve.



**eTable 1. List of Immune Gene Expression Signatures, Signature Class, PMID, and Genes Within a Signature**

| Signature ID paper                                               | Immune class   | Signature class | PMID              | Genes                                                                                                                                                                                                                                                                                                                                                                                                                                                                                                                                                                                  |
|------------------------------------------------------------------|----------------|-----------------|-------------------|----------------------------------------------------------------------------------------------------------------------------------------------------------------------------------------------------------------------------------------------------------------------------------------------------------------------------------------------------------------------------------------------------------------------------------------------------------------------------------------------------------------------------------------------------------------------------------------|
| <b>Bcells.Cluster Iglesia CCR.2014<br/>PMID.24916698</b>         | <b>B cells</b> | Signature       | PMID.24<br>916698 | 3512; 9834; 608; 83416;<br>5450; 973; 96610; 8755;<br>389643; 150365; 974;<br>5079; 2208; 79368; 643;<br>930; 84824; 640; 115350;<br>931; 1269; 55024; 23495                                                                                                                                                                                                                                                                                                                                                                                                                           |
| <b>Bcells.IL10.Minus<br/>Lin JImmunol.2014<br/>PMID.25080484</b> | <b>B cells</b> | Signature       | PMID.25<br>080484 | 6504; 3586; 3569; 4049;<br>374; 50832; 1259; 5167;<br>2745; 54512; 92935; 6723;<br>760; 6507; 55176; 1960;<br>3280; 3662; 9021; 10406;<br>79005; 10794; 6503;<br>51559; 11147; 55784;<br>92002                                                                                                                                                                                                                                                                                                                                                                                         |
| <b>Bcells.IL10.Plus Lin<br/>JImmunol.2014<br/>PMID.25080484</b>  | <b>B cells</b> | Signature       | PMID.25<br>080484 | 225; 481; 822; 901; 946;<br>1491; 1545; 1831; 2149;<br>2170; 2213; 2316; 2838;<br>3087; 3512; 3552; 3587;<br>3597; 3663; 3687; 3695;<br>3782; 3937; 3956; 4000;<br>4046; 4063; 4233; 4938;<br>4940; 5027; 5996; 6346;<br>6505; 6843; 9235; 9447;<br>9760; 10150; 10225;<br>10550; 10628; 10752;<br>10800; 11343; 22797;<br>23208; 25842; 26207;<br>26230; 28984; 51284;<br>51676; 55785; 55809;<br>55824; 57379; 79026;<br>81553; 84561; 118429;<br>128553; 130367; 143686;<br>151963; 162394; 166824;<br>167838; 201799; 219285;<br>219855; 257144; 285386;<br>374618; 388325; 402415 |
| <b>Bcells.Centroblast<br/>Dybaer JCO.2015<br/>PMID.25800755</b>  | <b>B cells</b> | Signature       | PMID.25<br>800755 | 10810; 7482; 148229; 651;<br>23710; 4086; 54443;<br>259266; 55635; 7153;<br>100126791; 283431; 9928;<br>10112; 80119; 1062;<br>25959; 8739; 4297;<br>157740; 101928620;<br>81930; 79071; 5450;<br>23089; 1063; 9787; 27109;<br>4751; 9582; 10733; 4798;<br>5577; 124989; 983;<br>100506844; 23766                                                                                                                                                                                                                                                                                      |

|                                                                          |                |           |                   |                                                                                                                                                                                                                                                                                                                                                                                                                                         |
|--------------------------------------------------------------------------|----------------|-----------|-------------------|-----------------------------------------------------------------------------------------------------------------------------------------------------------------------------------------------------------------------------------------------------------------------------------------------------------------------------------------------------------------------------------------------------------------------------------------|
| <b>Bcells.Centrocyte<br/>Dybaer JCO.2015<br/>PMID.25800755</b>           | <b>B cells</b> | Signature | PMID.25<br>800755 | 55448; 8622; 101929450;<br>639; 54820; 116931;<br>94121; 327657; 64805;<br>597; 6662; 88; 3117;<br>55971; 4023; 9638; 92737;<br>1960; 25953; 3119; 84102;<br>285313; 63971; 10170;<br>55785; 816; 285237; 5795;<br>1289; 53354; 23334;<br>54072; 55293; 147945;<br>3690; 100506930; 27197;<br>148808; 114614; 9782;<br>2956; 9133; 100509457;<br>406947; 724102                                                                         |
| <b>Bcells.Memory<br/>Dybaer JCO.2015<br/>PMID.25800755</b>               | <b>B cells</b> | Signature | PMID.25<br>800755 | 6352; 170371; 946; 1230;<br>100506071; 3684; 27197;<br>374618; 1285; 1690;<br>440823; 27163; 2857;<br>2212; 79026; 195; 83417;<br>339005; 10382; 285972;<br>8082; 3310; 440253                                                                                                                                                                                                                                                          |
| <b>Bcells.Naive Dybaer<br/>JCO.2015<br/>PMID.25800755</b>                | <b>B cells</b> | Signature | PMID.25<br>800755 | 55211; 10252; 4345; 351;<br>8496; 5243; 167410;<br>140733; 643733;<br>100128252; 8531; 8115;<br>342926; 909; 5796; 9976;<br>646113; 4606; 1901; 6328;<br>2650; 401312; 646588;<br>63934; 2208                                                                                                                                                                                                                                           |
| <b>Bcells.Memory<br/>CIBERSORT<br/>NatMethods.2015<br/>PMID.25822800</b> | <b>B cells</b> | Signature | PMID.25<br>822800 | 10863; 60468; 55024; 640;<br>4064; 930; 911; 933; 951;<br>969; 971; 973; 974; 1380;<br>643; 9214; 2213; 79368;<br>2444; 2841; 91316; 3087;<br>3112; 3495; 3507; 3514;<br>91353; 3394; 80183; 4050;<br>9450; 931; 4829; 5026;<br>5368; 5790; 55103; 10235;<br>150094; 6557; 6689;<br>26228; 29802; 9447; 240;<br>1235; 939; 9629; 160518;<br>9750; 2788; 3446; 3574;<br>4153; 440348; 27240;<br>11262; 80008; 23495; 608;<br>9618; 27033 |
| <b>Bcells.Naive<br/>CIBERSORT<br/>NatMethods.2015<br/>PMID.25822800</b>  | <b>B cells</b> | Signature | PMID.25<br>822800 | 5244; 10863; 60468;<br>55024; 605; 79656; 640;<br>673; 4064; 930; 911; 933;<br>951; 969; 971; 973; 974;<br>1380; 643; 55840; 9214;<br>2208; 2213; 79368; 2444;<br>2841; 91316; 3087; 3112;<br>3495; 3507; 3514; 91353;<br>3566; 3394; 80183;<br>283876; 4050; 9450; 4224;<br>57553; 931; 55335; 4829;                                                                                                                                   |

|                                                                                               |                |           |                   |                                                                                                                                                                                                                                                                                                                                                                                                                                                                                                                                                                                                                |
|-----------------------------------------------------------------------------------------------|----------------|-----------|-------------------|----------------------------------------------------------------------------------------------------------------------------------------------------------------------------------------------------------------------------------------------------------------------------------------------------------------------------------------------------------------------------------------------------------------------------------------------------------------------------------------------------------------------------------------------------------------------------------------------------------------|
|                                                                                               |                |           |                   | 5026; 9934; 5368; 5670; 5790; 55103; 10235; 6402; 150094; 6557; 6689; 26228; 8115; 54576; 29802; 57335                                                                                                                                                                                                                                                                                                                                                                                                                                                                                                         |
| <b>Bcells Garber<br/>CellMolGastroenterol<br/>Hepatol.2017<br/>PMID.28508029</b>              | <b>B cells</b> | Signature | PMID.28<br>508029 | 10863; 240; 60468; 55024; 53335; 53335; 53335; 53335; 640; 643; 930; 933; 951; 951; 958; 971; 973; 2208; 2788; 3087; 3112; 3117; 114884; 5368; 25780; 6689; 8115; 29802; 9934; 55103; 55103; 55103; 6039; 6328; 608                                                                                                                                                                                                                                                                                                                                                                                            |
| <b>Bcells.Extended<br/>Garber<br/>CellMolGastroenterol<br/>Hepatol.2017<br/>PMID.28508029</b> | <b>B cells</b> | Signature | PMID.28<br>508029 | 3899; 65069; 10409; 695; 66033; 201895; 934; 100133941; 972; 972; 973; 26047; 51523; 378885; 9214; 84824; 23062; 3119; 3126; 23231; 4067; 4082; 55846; 256236; 5336; 5777; 10509; 51092; 6643                                                                                                                                                                                                                                                                                                                                                                                                                  |
| <b>Bcells Bindea<br/>Immunity.2013<br/>PMID.24138885</b>                                      | <b>B cells</b> | Signature | PMID.24<br>138885 | 608; 640; 930; 931; 971; 1380; 1690; 1838; 2731; 2788; 3112; 3117; 3493; 3500; 3507; 3514; 3535; 4208; 5244; 5368; 6328; 6565; 6689; 8115; 9834; 10803; 29064; 29760; 53335; 55278; 57553; 60468; 79368; 114884                                                                                                                                                                                                                                                                                                                                                                                                |
| <b>Bcells.ImmuneProfiles.Mouse.Human<br/>Shay PNAS.2013<br/>PMID.23382184</b>                 | <b>B cells</b> | Signature | PMID.23<br>382184 | 19; 330; 489; 605; 640; 643; 695; 930; 931; 933; 951; 958; 971; 972; 973; 974; 1185; 1235; 1380; 1387; 1456; 1657; 1960; 2181; 2185; 2208; 2841; 2872; 2889; 3280; 3399; 3592; 3662; 3708; 3915; 4033; 4064; 4208; 4209; 4214; 4641; 5079; 5106; 5142; 5287; 5290; 5336; 5451; 5452; 5530; 5579; 5777; 5925; 5966; 5993; 6480; 6565; 6598; 6643; 6689; 6721; 6850; 6925; 6929; 6949; 7187; 7430; 7799; 7942; 8202; 8527; 8564; 8930; 8942; 9015; 9026; 9135; 9308; 9450; 9451; 9467; 9640; 9657; 9665; 9681; 9711; 9734; 9779; 9788; 9873; 9896; 9922; 10193; 10447; 10564; 11108; 11142; 22837; 22876; 22898; |

|                                                                          |                |           |                |                                                                                                                                                                                                                                                                                                                                                                                                                                                                                                                                           |
|--------------------------------------------------------------------------|----------------|-----------|----------------|-------------------------------------------------------------------------------------------------------------------------------------------------------------------------------------------------------------------------------------------------------------------------------------------------------------------------------------------------------------------------------------------------------------------------------------------------------------------------------------------------------------------------------------------|
|                                                                          |                |           |                | 22906; 23035; 23062; 23075; 23216; 23325; 23411; 23495; 23515; 23596; 24149; 25780; 26040; 26051; 26228; 27314; 27334; 29116; 29760; 29802; 50618; 51284; 51363; 51585; 53335; 54468; 54920; 55016; 55024; 55114; 55149; 55278; 55500; 55565; 55589; 55702; 55788; 57102; 57157; 57396; 58513; 59339; 59342; 60468; 60485; 64376; 64783; 64853; 65117; 65986; 79161; 79365; 79591; 79600; 79622; 79651; 79874; 80021; 80183; 80221; 80237; 83478; 84159; 160518; 200576; 201895; 221037; 221749; 283232; 5450; 9712; 101928620; 100507213 |
| <b>Bcells.Activated Charoentong CellRep.2017 PMID.28052254</b>           | <b>B cells</b> | Signature | PMID.28 052254 | 79368; 3507; 931; 10863; 80709; 9938; 60468; 640; 6366; 4064; 930; 939; 952; 974; 388512; 283420; 160365; 1380; 2788; 3112; 3514; 57553; 5368; 6689; 8115; 608                                                                                                                                                                                                                                                                                                                                                                            |
| <b>Bcells.Immature Charoentong CellRep.2017 PMID.28052254</b>            | <b>B cells</b> | Signature | PMID.28 052254 | 115350; 26228; 933; 1536; 199786; 115352; 83416; 84824; 9734; 3117; 84329; 9711; 653361; 654816; 27334; 6672; 117289; 10628; 54877                                                                                                                                                                                                                                                                                                                                                                                                        |
| <b>Bcells.Memory Charoentong CellRep.2017 PMID.28052254</b>              | <b>B cells</b> | Signature | PMID.28 052254 | 4609; 57379; 890; 1033; 1184; 5167; 2205; 83417; 860; 6653; 6660; 6776; 6777; 54106                                                                                                                                                                                                                                                                                                                                                                                                                                                       |
| <b>Bcells ImSig.Nirmal CancerImmunoIRes. 2018 PMID.30266715</b>          | <b>B cells</b> | Signature | PMID.30 266715 | 283663; 100507616; 29802; 640; 79368; 8115; 5079; 115350; 4063; 971; 83416; 115352; 8698; 5452; 931; 79856; 933; 199786; 3112; 81793; 1380; 26228; 3899; 4064; 5026; 151888; 951; 1235; 930; 28387; 5368; 1879; 974; 84824; 55024; 973                                                                                                                                                                                                                                                                                                    |
| <b>Bcells.Plasma.cells.5 2genes Miller GenomeBiol.2013 PMID.23618380</b> | <b>B cells</b> | Signature | PMID.23 618380 | 973; 26586; 9917; 3662; 54900; 4917; 5450; 608; 3512; 91316; 100423062; 723778; 3500; 28461;                                                                                                                                                                                                                                                                                                                                                                                                                                              |

|                                                                                                                    |                        |           |                   |                                                                                                                                                                                                                                                                                       |
|--------------------------------------------------------------------------------------------------------------------|------------------------|-----------|-------------------|---------------------------------------------------------------------------------------------------------------------------------------------------------------------------------------------------------------------------------------------------------------------------------------|
|                                                                                                                    |                        |           |                   | 28937; 91353; 28862; 28939; 3507; 3525; 28797; 106481689; 28445; 3531; 28444; 28391; 28442; 3493; 28893; 28803; 3494; 28902; 28883; 28894; 28900; 3505; 106480274; 28921; 28452; 28930; 28815; 28931; 28908; 28458; 28912; 28793; 3538; 644731; 3532; 3537; 28392; 3539               |
| <b>Immune.CD19<br/>TCGA.BRCA.1198<br/>JCI.2020<br/>PMID.32573490</b>                                               | <b>B cells</b>         | Signature | PMID.32<br>573490 | 8115; 79368; 930; 640; 1269; 931; 84824; 5079                                                                                                                                                                                                                                         |
| <b>Immune1<br/>TCGA.BRCA.1198<br/>JCI.2020<br/>PMID.32573490</b>                                                   | <b>B cells</b>         | Signature | PMID.32<br>573490 | 952; 9834; 973; 83416; 5450; 96610; 608; 8755; 3662; 54900; 389643                                                                                                                                                                                                                    |
| <b>Bcells.Tcells.Cooper<br/>ation Hollern<br/>Cell.2019<br/>PMID.31730857</b>                                      | <b>B cells/T cells</b> | Signature | PMID.31<br>730857 | 115350; 640; 3502; 3502; 28776; 3500; 3502; 3514; 3512; 973; 100423062; 100423062; 3495; 930; 931; 5079; 3581; 6363; 51617; 2864; 959; 28558; 28621; 387923; 388507                                                                                                                   |
| <b>Immune.14 Perez<br/>JCO.2015<br/>PMID.2560586</b>                                                               | <b>B cells/T cells</b> | Signature | PMID.25<br>605861 | 84632; 120425; 6366; 1233; 913; 959; 6387; 2534; 3112; 3487; 3394; 5729; 5734; 81793                                                                                                                                                                                                  |
| <b>Tcells.Bcells.Lymph<br/>ocyte.Infiltration<br/>Calabro<br/>BreastCancerResTre<br/>at.2009<br/>PMID.18592372</b> | <b>B cells/T cells</b> | Signature | PMID.18<br>592372 | 6352; 930; 951; 915; 916; 917; 919; 973; 974; 925; 926; 3502; 3512; 3537; 929; 3932; 4050; 931                                                                                                                                                                                        |
| <b>Immune.CD4.CD53.C<br/>D84.BTK<br/>TCGA.BRCA.1198<br/>JCI.2020<br/>PMID.32573490</b>                             | <b>B cells/T cells</b> | Signature | PMID.32<br>573490 | 221472; 257106; 1536; 8832; 22797; 313; 3394; 1234; 2124; 695; 920; 963; 5341; 1794; 3071; 3937; 2533; 5788; 10320; 3587; 3594; 64333; 54440; 5778; 124460; 6693; 388325; 89857; 64092; 23533; 286336; 951; 199; 7940; 79626; 3059; 27128; 4542; 83706; 6688; 7454; 4689; 64098; 6404 |
| <b>CD103.Negative Broz<br/>CancerCell.2014<br/>PMID.25446897</b>                                                   | <b>Dendritic cells</b> | Signature | PMID.25<br>446897 | 728; 10894; 8714; 4360; 6614; 23166; 713; 712; 140738; 10461; 714; 338773; 58475; 348; 8529; 54209; 51284                                                                                                                                                                             |

|                                                                                |                        |           |                   |                                                                                                                                                                                                                                                                                                                                         |
|--------------------------------------------------------------------------------|------------------------|-----------|-------------------|-----------------------------------------------------------------------------------------------------------------------------------------------------------------------------------------------------------------------------------------------------------------------------------------------------------------------------------------|
| <b>Dendritic.cells.Activated CIBERSORT NatMethods.2015 PMID.25822800</b>       | <b>Dendritic cells</b> | Signature | PMID.25<br>822800 | 51296; 1193; 6362; 54209; 6357; 6367; 7941; 6361; 910; 913; 2359; 4321; 55026; 6355; 10148; 6614; 3357; 80380; 6352; 3559; 5739; 1236; 6363; 3627; 6373; 79132; 8820; 3620; 10964; 8942; 27074; 51365; 83937; 91543; 11182; 7130; 1593; 7293; 6364; 58504; 330; 6346; 941; 942; 56548; 2117; 3593; 9175; 9242; 8013; 81796; 10402; 8792 |
| <b>Dendritic.cells.Resting CIBERSORT NatMethods.2015 PMID.25822800</b>         | <b>Dendritic cells</b> | Signature | PMID.25<br>822800 | 51296; 1193; 968; 51313; 6362; 54209; 199; 50856; 2535; 246; 6357; 30835; 10462; 10261; 4688; 54; 79839; 6367; 7941; 56833; 945; 64581; 6039; 6335; 911; 2208; 79630; 6361; 909; 910; 913; 79154; 1959; 2205; 55640; 2359; 3117; 4321; 8496; 55026                                                                                      |
| <b>Dendritic.cells.Activated Bindea Immunity.2013 PMID.24138885</b>            | <b>Dendritic cells</b> | Signature | PMID.24<br>138885 | 3620; 4940; 6346; 10148; 27074                                                                                                                                                                                                                                                                                                          |
| <b>Dendritic.cells Bindea Immunity.2013 PMID.24138885</b>                      | <b>Dendritic cells</b> | Signature | PMID.24<br>138885 | 3290; 4881; 6357; 6361; 6367; 8495; 30835                                                                                                                                                                                                                                                                                               |
| <b>Dendritic.cells.ImmuneProfiles.Mouse.Human Shay PNAS.2013 PMID.23382184</b> | <b>Dendritic cells</b> | Signature | PMID.23<br>382184 | 1471; 1776; 2322; 2828; 3383; 4610; 5058; 5199; 5547; 6252; 7045; 8321; 9314; 10875; 23677; 28955; 51177; 54802; 55022; 55509; 55521; 57118; 57698; 79887; 80005; 80176                                                                                                                                                                 |
| <b>Dendritic.cells.Activated Charoentong CellRep.2017 PMID.28052254</b>        | <b>Dendritic cells</b> | Signature | PMID.28<br>052254 | 822; 4843; 6503; 8926; 10011; 215; 10096; 506; 10632; 523; 598; 713; 714; 414062; 8900; 50489; 9936; 1088; 170482; 3118; 5861; 387; 8778; 89886; 51312; 60559; 7127; 8771; 8740; 54210; 340205; 285852; 10537; 8875; 23214                                                                                                              |
| <b>Dendritic.cells.Immature. Charoentong CellRep.2017 PMID.28052254</b>        | <b>Dendritic cells</b> | Signature | PMID.28<br>052254 | 400; 22876; 353514; 34; 10768; 8854; 224; 223; 246; 271; 275; 471; 498; 128346; 829; 1212; 1441; 5328; 23682; 5962; 58528; 6571; 4070                                                                                                                                                                                                   |

|                                                                                          |                        |           |                   |                                                                                                                                                                                                                                                                                                                                    |
|------------------------------------------------------------------------------------------|------------------------|-----------|-------------------|------------------------------------------------------------------------------------------------------------------------------------------------------------------------------------------------------------------------------------------------------------------------------------------------------------------------------------|
| <b>Dendritic.cells.Immature. Bindea Immunity.2013 PMID.24138885</b>                      | <b>Dendritic cells</b> | Signature | PMID.24<br>138885 | 645; 909; 910; 911; 913; 1436; 1497; 2162; 2167; 2535; 2952; 2978; 4070; 4321; 5468; 5550; 5909; 8566; 9023; 9429; 9956; 10462; 22846; 23428; 51760; 53343; 64170; 64231; 65010; 81501; 81562                                                                                                                                      |
| <b>Plasmacytoid.Dendritic.cell Charoentong CellRep.2017 PMID.28052254</b>                | <b>Dendritic cells</b> | Signature | PMID.28<br>052254 | 80325; 23466; 146722; 1601; 10521; 2014; 2022; 2204; 11337; 2876; 25994; 3419; 3479; 3563; 3674; 9903; 25984; 9500; 4925; 8481; 8473; 9601; 57661; 60675; 5899; 84666; 50862; 6397; 51734; 9792; 140885; 10959                                                                                                                     |
| <b>Eosinophils CIBERSORT NatMethods.2015 PMID.2582800</b>                                | <b>Eosinophils</b>     | Signature | PMID.25<br>822800 | 8809; 671; 932; 6003; 1178; 9173; 9934; 719; 10402; 246; 4688; 53829; 23569; 6036; 51744; 8807; 8972; 26030; 5996; 55024; 597; 27202; 1602; 23604; 9681; 64174; 2015; 30817; 84658; 22905; 2867; 2696; 1880; 8477; 222487; 3568; 4033; 4117; 4084; 27334; 5029; 5146; 27039; 9185; 23223; 64092; 55512; 27293; 79865; 140803; 7673 |
| <b>Eosinophils Bindea Immunity.2013 PMID.24138885</b>                                    | <b>Eosinophils</b>     | Signature | PMID.24<br>138885 | 32; 847; 1178; 1232; 2015; 2581; 3006; 3280; 3568; 3757; 6036; 6477; 7050; 7057; 7060; 8277; 8867; 9398; 9920; 11057; 11251; 22905; 23223; 25976; 51531; 55512; 55758; 57105; 59340; 91355; 728965; 80022                                                                                                                          |
| <b>Eosinophils Charoentong CellRep.2017 PMID.28052254</b>                                | <b>Eosinophils</b>     | Signature | PMID.28<br>052254 | 1602; 23604; 9681; 84658; 2354; 2696; 1880; 8477; 3568; 442236; 4033; 8013; 9934; 5146; 27039; 23223; 10402                                                                                                                                                                                                                        |
| <b>Hematopoietic.Stem.cells.ImmuneProfiles .Mouse.Human Shay PNAS.2013 PMID.23382184</b> | <b>Hematopoietic</b>   | Signature | PMID.23<br>382184 | 34; 284; 328; 332; 402; 444; 501; 594; 667; 672; 701; 759; 760; 783; 835; 947; 983; 1017; 1019; 1021; 1063; 1111; 1163; 1312; 1503; 1523; 1602; 1635; 1718; 1793; 1854; 1869; 1876; 1892; 1954; 1964; 2078; 2099; 2119; 2120; 2135; 2237; 2288;                                                                                    |

|  |  |  |  |                                                                                                                                                                                                                                                                                                                                                                                                                                                                                                                                                                                                                                                                                                                                                                                                                                                                                                                                                                                                                                                                                                                                                                                                                                                                                                                                                                                                                                                                                           |
|--|--|--|--|-------------------------------------------------------------------------------------------------------------------------------------------------------------------------------------------------------------------------------------------------------------------------------------------------------------------------------------------------------------------------------------------------------------------------------------------------------------------------------------------------------------------------------------------------------------------------------------------------------------------------------------------------------------------------------------------------------------------------------------------------------------------------------------------------------------------------------------------------------------------------------------------------------------------------------------------------------------------------------------------------------------------------------------------------------------------------------------------------------------------------------------------------------------------------------------------------------------------------------------------------------------------------------------------------------------------------------------------------------------------------------------------------------------------------------------------------------------------------------------------|
|  |  |  |  | 2356; 2553; 2624; 2677;<br>2766; 2887; 2954; 2956;<br>2982; 3012; 3033; 3068;<br>3070; 3131; 3146; 3161;<br>3182; 3192; 3202; 3251;<br>3276; 3329; 3382; 3418;<br>3480; 3608; 3613; 3615;<br>3815; 3832; 3843; 3925;<br>3998; 4005; 4076; 4085;<br>4171; 4172; 4211; 4352;<br>4353; 4363; 4522; 4602;<br>4613; 4628; 4692; 4734;<br>4778; 4800; 4833; 5023;<br>5087; 5111; 5198; 5213;<br>5311; 5321; 5324; 5332;<br>5422; 5425; 5427; 5523;<br>5557; 5577; 5977; 5983;<br>5985; 6453; 6491; 6595;<br>6599; 6632; 6652; 6659;<br>6767; 6790; 6886; 7029;<br>7035; 7036; 7075; 7105;<br>7106; 7158; 7205; 7298;<br>7372; 7389; 7416; 7485;<br>7504; 7531; 7586; 8031;<br>8091; 8204; 8243; 8317;<br>8323; 8476; 8508; 8578;<br>8624; 8645; 8722; 8727;<br>8848; 8971; 9053; 9203;<br>9289; 9319; 9352; 9500;<br>9508; 9555; 9643; 9761;<br>9767; 9787; 9829; 9985;<br>10040; 10155; 10165;<br>10203; 10217; 10247;<br>10282; 10314; 10477;<br>10493; 10549; 10591;<br>10592; 10606; 10733;<br>10788; 10856; 10857;<br>10951; 11130; 11167;<br>11169; 11200; 11328;<br>11335; 22823; 22836;<br>22915; 22955; 23093;<br>23111; 23243; 23294;<br>23468; 23556; 23621;<br>23635; 23682; 25966;<br>26227; 26586; 27018;<br>27346; 29105; 29803;<br>29902; 30968; 50810;<br>51097; 51098; 51118;<br>51134; 51144; 51186;<br>51203; 51205; 51309;<br>51514; 51566; 51603;<br>51659; 51768; 54433;<br>54470; 54517; 54682;<br>54874; 54962; 55128;<br>55164; 55165; 55197;<br>55326; 55652; 55746; |
|--|--|--|--|-------------------------------------------------------------------------------------------------------------------------------------------------------------------------------------------------------------------------------------------------------------------------------------------------------------------------------------------------------------------------------------------------------------------------------------------------------------------------------------------------------------------------------------------------------------------------------------------------------------------------------------------------------------------------------------------------------------------------------------------------------------------------------------------------------------------------------------------------------------------------------------------------------------------------------------------------------------------------------------------------------------------------------------------------------------------------------------------------------------------------------------------------------------------------------------------------------------------------------------------------------------------------------------------------------------------------------------------------------------------------------------------------------------------------------------------------------------------------------------------|



|                                                                               |            |           |                   |                                                                                                                                                                                                                                                                                                                                                                                                                                                                                                                        |
|-------------------------------------------------------------------------------|------------|-----------|-------------------|------------------------------------------------------------------------------------------------------------------------------------------------------------------------------------------------------------------------------------------------------------------------------------------------------------------------------------------------------------------------------------------------------------------------------------------------------------------------------------------------------------------------|
|                                                                               |            |           |                   | 55759; 55907; 56925; 57088; 57597; 60496; 63826; 64087; 64754; 64798; 64866; 79000; 79004; 79023; 79070; 79071; 79077; 79896; 80177; 80823; 84790; 84823; 90861; 92579; 94239; 114876; 117178; 200081; 284119; 441024; 11113; 1500; 205; 378708; 3992; 54930; 5867; 6573; 7982; 8339; 861; 100302274; 100528016; 100507855; 100526739; 100302263; 100616424; 10638; 101928717; 93655; 8343; 100506403; 102466616; 8344; 101928269; 8346; 8347                                                                          |
| <b>Immune.HLA.A.F<br/>TCGA.BRCA.1198<br/>JCI.2020<br/>PMID.32573490</b>       | <b>HLA</b> | Signature | PMID.32<br>573490 | 3133; 116071; 3659; 81030; 3902; 3107; 3105; 3106; 3134; 5698; 5696; 6890; 3965; 3601; 197259                                                                                                                                                                                                                                                                                                                                                                                                                          |
| <b>Immune.HLA.D<br/>TCGA.BRCA.1198<br/>JCI.2020<br/>PMID.32573490</b>         | <b>HLA</b> | Signature | PMID.32<br>573490 | 972; 3108; 3109; 3122; 3115; 3113                                                                                                                                                                                                                                                                                                                                                                                                                                                                                      |
| <b>IFNa.Module10 Gatza<br/>ProcNatlAcadSciUS<br/>A.2010<br/>PMID.20335537</b> | <b>IFN</b> | Signature | PMID.20<br>335537 | 51479; 23780; 80830; 11119; 11118; 10384; 55337; 9473; 834; 961; 8837; 56259; 3627; 23586; 55601; 23549; 10468; 2633; 2643; 2650; 51191; 55008; 3106; 3107; 10437; 3430; 10561; 10964; 2537; 3434; 3433; 3437; 24138; 8519; 3600; 3659; 3665; 9636; 3669; 3717; 3964; 26010; 4061; 4599; 4600; 4615; 4938; 4939; 4940; 8638; 11054; 5359; 5371; 5698; 55905; 91543; 64108; 6398; 51296; 81894; 8467; 3431; 9517; 6772; 6773; 6890; 6891; 23424; 7098; 80021; 10906; 11277; 9830; 6737; 7318; 9246; 11274; 54739; 56829 |
| <b>IFNg.Module11 Gatza<br/>ProcNatlAcadSciUS<br/>A.2010<br/>PMID.20335537</b> | <b>IFN</b> | Signature | PMID.20<br>335537 | 23780; 80830; 406; 528; 55509; 604; 11119; 11118; 10384; 55337; 9473; 23607; 961; 1506; 3627; 6373; 4283; 23586; 23549; 2115; 2355; 10468; 2633;                                                                                                                                                                                                                                                                                                                                                                       |

|                                                                                    |            |           |                   |                                                                                                                                                                                                                                                                                                                                                                                       |
|------------------------------------------------------------------------------------|------------|-----------|-------------------|---------------------------------------------------------------------------------------------------------------------------------------------------------------------------------------------------------------------------------------------------------------------------------------------------------------------------------------------------------------------------------------|
|                                                                                    |            |           |                   | 2643; 2820; 387751; 55008; 3620; 10437; 3430; 10561; 10964; 2537; 3433; 3437; 24138; 8519; 3600; 3659; 3394; 3717; 65987; 51056; 23175; 4599; 79840; 4837; 4939; 5099; 54103; 5359; 5366; 5464; 5638; 5698; 5920; 55905; 127544; 91543; 64108; 22904; 57147; 6398; 26040; 51296; 81894; 6672; 3431; 6772; 6773; 6890; 6891; 10420; 7127; 10906; 10221; 28951; 9830; 6737; 9246; 56829 |
| <b>IFN.Cluster.GSEA.G<br/>P11 Fan<br/>BMC Med Genomics.2<br/>011 PMID.21214954</b> | <b>IFN</b> | Signature | PMID.21<br>214954 | 6772; 10068; 54739; 567; 91543; 94240; 5696; 5698; 56829; 3430; 23586; 388646; 3627; 6352; 163351; 4283; 29126; 85441; 7318; 3959; 83666; 10379; 103; 3433; 8638; 55601; 64135; 64108; 115361; 10561; 4599; 9636; 684; 11274; 3434; 4939; 81030; 54625; 345611; 6773; 64761; 6672; 2633; 116071; 9111; 146857; 387751; 3659                                                           |
| <b>IFN Rody<br/>Breast Cancer Research<br/>ch.2008<br/>PMID.19272155</b>           | <b>IFN</b> | Signature | PMID.19<br>272155 | 91543; 4940; 10561; 9636; 55601; 10964; 2537; 4599; 3437; 3429; 3434; 4938; 4939                                                                                                                                                                                                                                                                                                      |
| <b>IFN.Cluster Fan<br/>BMC Med Genomics.2<br/>011 PMID.21214954</b>                | <b>IFN</b> | Signature | PMID.21<br>214954 | 55337; 684; 3431; 64761; 24138; 4938; 10379; 11274; 23586; 4600; 3429; 4939; 2537; 3437; 10964; 10561; 3434; 9636; 4599; 91543; 4940; 55008; 51191; 55601; 5359; 9246; 54809; 64108; 54739; 9111; 8519; 10410; 3669; 5721; 5720; 3665                                                                                                                                                 |
| <b>IFN.3.ImmLandscape<br/>Wolf PlosOne.2014<br/>PMID.24516633</b>                  | <b>IFN</b> | Signature | PMID.24<br>516633 | 3627; 23586; 55601; 51191; 55008; 3429; 10561; 10964; 2537; 64135; 3434; 3433; 3437; 9636; 4599; 4938; 4939; 4940; 8638; 91543; 64108; 54809; 6772; 6890                                                                                                                                                                                                                              |
| <b>IFN.5.ImmLandscape<br/>Wolf PlosOne.2014<br/>PMID.24516633</b>                  | <b>IFN</b> | Signature | PMID.24<br>516633 | 27299; 9447; 597; 330; 10384; 6357; 6362; 6363; 6352; 6355; 1236; 930; 952; 917; 969; 973; 942; 926; 64581; 56253; 1075;                                                                                                                                                                                                                                                              |

|                                                                                 |            |           |                   |                                                                                                                                                                                                                                                                                                                                                                                                                                                         |
|---------------------------------------------------------------------------------|------------|-----------|-------------------|---------------------------------------------------------------------------------------------------------------------------------------------------------------------------------------------------------------------------------------------------------------------------------------------------------------------------------------------------------------------------------------------------------------------------------------------------------|
|                                                                                 |            |           |                   | 1520; 3627; 6373; 10563; 4283; 10663; 1536; 9595; 2219; 2533; 2633; 10578; 29909; 2841; 3002; 2999; 3003; 10866; 29851; 3620; 3458; 10261; 3600; 3561; 9235; 3659; 3669; 3702; 3902; 27074; 3932; 10288; 50536986; 4067; 51237; 4818; 80896; 11040; 7941; 51316; 5450; 5698; 5778; 64108; 864; 64092; 23231; 6402; 57823; 56833; 11262; 6890; 22797; 608; 50852; 10537; 8875; 7453; 79413                                                               |
| <b>IFN.Pathway<br/>ImSig.Nirmal<br/>CancerImmunoRes.<br/>2018 PMID.30266715</b> | <b>IFN</b> | Signature | PMID.30<br>266715 | 57169; 85441; 10964; 57674; 85363; 11274; 9636; 55601; 94240; 4599; 4600; 116071; 684; 151636; 55008; 51191; 10561; 3428; 84875; 51056; 6614; 64761; 54625; 115361; 2633; 64135; 64108; 8519; 4940; 5371; 91543; 4939; 3431; 219285; 3430; 84941; 129607; 6890; 51246; 26270; 54739; 79132; 9246; 51131; 6772; 10346; 6737; 6773; 55337; 5698; 23586; 10379; 3437; 3433; 8638; 3434; 8542; 27074; 83666; 24138; 3665; 54809; 10906; 80830; 441108; 2537 |
| <b>IFN.Score.module3<br/>TCGA Immunity.2018<br/>PMID.29628290</b>               | <b>IFN</b> | Signature | PMID.29<br>628290 | 10561; 10964; 23586; 2537; 3429; 3433; 3434; 3437; 8375; 8374; 8376; 3627; 4599; 4938; 4939; 4940; 51191; 54809; 55008; 55601; 64108; 64135; 6772; 6890; 8638; 91543; 9636                                                                                                                                                                                                                                                                              |
| <b>Immune.IFN<br/>TCGA.BRCA.1198<br/>JCI.2020<br/>PMID.32573490</b>             | <b>IFN</b> | Signature | PMID.32<br>573490 | 10379; 24138; 51191; 55008; 55601; 54809; 3429; 2537; 9636; 23586; 64135; 3434; 10561; 10964; 3433; 3437; 129607; 91543; 4939; 4599; 8638; 4938; 4940; 54625; 83666; 6772; 11274; 54739; 4600; 64761; 5359; 9246; 6672; 3431                                                                                                                                                                                                                            |

|                                                                             |                                            |           |                   |                                                                                                                                                                                                                                                                                                                                                                                                                                             |
|-----------------------------------------------------------------------------|--------------------------------------------|-----------|-------------------|---------------------------------------------------------------------------------------------------------------------------------------------------------------------------------------------------------------------------------------------------------------------------------------------------------------------------------------------------------------------------------------------------------------------------------------------|
| <b>IgG Rody<br/>BreastCancerResear<br/>ch.2008<br/>PMID.19272155</b>        | <b>Ig</b>                                  | Signature | PMID.19<br>272155 | 391427; 96610; 339562;<br>28902; 651961; 90925;<br>651629; 91353; 28299;<br>28461; 5450; 28831;<br>91316; 3538; 28793; 3514;<br>28815; 3500; 3507; 28786;<br>3495; 3493; 3535; 3492;<br>3537; 652745                                                                                                                                                                                                                                        |
| <b>IGG.Cluster Fan<br/>BMC MedGenomics.2<br/>011 PMID.21214954</b>          | <b>Ig</b>                                  | Signature | PMID.21<br>214954 | 939; 3561; 973; 11040;<br>5450; 3514; 28793; 3535;<br>3512; 608; 4917; 3576;<br>3107; 54900                                                                                                                                                                                                                                                                                                                                                 |
| <b>Ig TCGA.BRCA.1198<br/>Cell.2015<br/>PMID.26451490</b>                    | <b>Ig</b>                                  | Signature | PMID.26<br>451490 | 28904; 28467; 28875;<br>28426; 28776; 28474;<br>28919; 28424; 28923;<br>28874; 28420; 28784;<br>28423; 28817; 28937;<br>28457; 28876; 28943;<br>28778; 28400; 28396;<br>28793; 28434; 28391;<br>28941; 28938; 28935;<br>28408; 28394; 28797;<br>28914; 28395; 28465;<br>28809; 28450; 28822;<br>28448; 28933; 28468;<br>28388; 28813; 28921;<br>28444; 28815; 28893;<br>28392; 28299; 28442;<br>28912; 28908; 28913;<br>28825; 28439; 28796 |
| <b>Immune.Suppressio<br/>n Kardos<br/>JCIInsight.2016<br/>PMID.27699256</b> | <b>Immune<br/>checkpoint<br/>molecules</b> | Signature | PMID.27<br>699256 | 29126; 3620; 356; 1493;<br>5133; 3902; 84868; 80380;<br>3586; 7040; 5743; 4513                                                                                                                                                                                                                                                                                                                                                              |
| <b>CD274.Single.Gene<br/>Hollern Cell.2019<br/>PMID.31730857</b>            | <b>Immune<br/>checkpoint<br/>molecules</b> | Gene      | PMID.31<br>730857 | 29126; 29126; 29126;<br>29126                                                                                                                                                                                                                                                                                                                                                                                                               |
| <b>CTLA4.Single.Gene<br/>Hollern Cell.2019<br/>PMID.31730857</b>            | <b>Immune<br/>checkpoint<br/>molecules</b> | Gene      | PMID.31<br>730857 | 1493; 1493; 1493; 1493                                                                                                                                                                                                                                                                                                                                                                                                                      |
| <b>PDCD1.Single.Gene<br/>Pare AnnOncol.2019<br/>PMID.30165419</b>           | <b>Immune<br/>checkpoint<br/>molecules</b> | Gene      | PMID.30<br>165419 | 5133; 5133; 5133; 5133                                                                                                                                                                                                                                                                                                                                                                                                                      |
| <b>Immunosuppression<br/>Petitprez<br/>Nature.2020<br/>PMID.31942077</b>    | <b>Immune<br/>suppression</b>              | Signature | PMID.31<br>942077 | 7043; 6387; 7040; 3956                                                                                                                                                                                                                                                                                                                                                                                                                      |
| <b>Stromal.Inflammatio<br/>n Heng JPathol.2017<br/>PMID.27861902</b>        | <b>Inflammation</b>                        | Signature | PMID.27<br>861902 | 1493; 27436; 50943; 2633;<br>9812; 11040; 23231; 9047;<br>56833; 201633; 79413                                                                                                                                                                                                                                                                                                                                                              |
| <b>Wound.Healing<br/>Chang PlosBiol.2004<br/>PMID.14737219</b>              | <b>Inflammation</b>                        | Signature | PMID.14<br>737219 | 292; 1111; 1178; 1326;<br>1633; 1663; 1841; 1978;<br>1981; 2023; 2107; 2171;<br>2193; 2224; 2923; 3015;<br>3037; 3146; 3151; 3157;                                                                                                                                                                                                                                                                                                          |

|                                                                     |                            |                  |                            |                                                                                                                                                                                                                                                                                                                                                                                                                                                                                                                                                                                                                                                                                                                                                                                                                                                                                                                                                                                                                                                                                                                                                                                                                    |
|---------------------------------------------------------------------|----------------------------|------------------|----------------------------|--------------------------------------------------------------------------------------------------------------------------------------------------------------------------------------------------------------------------------------------------------------------------------------------------------------------------------------------------------------------------------------------------------------------------------------------------------------------------------------------------------------------------------------------------------------------------------------------------------------------------------------------------------------------------------------------------------------------------------------------------------------------------------------------------------------------------------------------------------------------------------------------------------------------------------------------------------------------------------------------------------------------------------------------------------------------------------------------------------------------------------------------------------------------------------------------------------------------|
|                                                                     |                            |                  |                            | <p>3181; 3182; 3422; 3638;<br/> 3655; 3988; 3992; 4172;<br/> 4176; 4240; 4331; 4478;<br/> 4521; 4597; 4603; 4605;<br/> 4830; 5036; 5214; 5216;<br/> 5329; 5352; 5427; 5447;<br/> 5688; 5695; 5702; 5708;<br/> 5718; 5757; 5805; 5814;<br/> 5902; 5983; 6182; 6184;<br/> 6319; 6382; 6427; 6434;<br/> 6566; 6590; 6611; 6626;<br/> 6627; 6628; 6631; 6632;<br/> 6635; 6675; 6713; 6723;<br/> 6747; 6921; 6993; 7077;<br/> 7127; 7167; 7277; 7283;<br/> 7372; 7416; 7866; 7965;<br/> 7980; 8202; 8836; 9235;<br/> 9263; 9276; 9415; 9521;<br/> 9601; 9818; 9821; 10056;<br/> 10063; 10204; 10301;<br/> 10432; 10452; 10465;<br/> 10534; 10535; 10606;<br/> 10733; 10799; 10951;<br/> 10969; 11169; 11325;<br/> 11333; 11340; 22919;<br/> 22948; 23175; 23406;<br/> 23558; 23603; 23646;<br/> 26207; 26471; 27020;<br/> 27258; 28957; 29088;<br/> 29796; 50484; 51128;<br/> 51192; 51253; 51330;<br/> 51444; 51491; 51534;<br/> 51668; 51670; 51696;<br/> 51728; 54206; 54858;<br/> 55038; 55055; 55110;<br/> 55186; 55270; 55631;<br/> 55646; 55651; 55706;<br/> 55835; 55839; 55884;<br/> 56926; 56942; 57122;<br/> 57213; 57486; 57523;<br/> 64750; 79007; 79172;<br/> 79682; 79902; 84823;<br/> 90861; 201254</p> |
| <p><b>TGFB.score TCGA<br/> Immunity.2018<br/> PMID.29628290</b></p> | <p><b>Inflammation</b></p> | <p>Signature</p> | <p>PMID.29<br/> 628290</p> | <p>4314; 65108; 3482; 3912;<br/> 6678; 2335; 3676; 6608;<br/> 4327; 3696; 3678; 4811;<br/> 7076; 6405; 23433; 1499;<br/> 4313; 5054; 2048; 1307;<br/> 1969; 3371; 3728; 3675;<br/> 6934; 1281; 1004; 7482;<br/> 8754; 1832; 3339; 392;<br/> 3693; 3488; 396; 4035;<br/> 3485; 1495; 10234; 4323;<br/> 4756; 1946; 3690; 2049;<br/> 960; 3487; 7132; 5879;<br/> 5829; 5327; 1295; 7479;</p>                                                                                                                                                                                                                                                                                                                                                                                                                                                                                                                                                                                                                                                                                                                                                                                                                         |

|                                                                              |                     |           |                   |                                                                                                                                                                                                                                                                                                                  |
|------------------------------------------------------------------------------|---------------------|-----------|-------------------|------------------------------------------------------------------------------------------------------------------------------------------------------------------------------------------------------------------------------------------------------------------------------------------------------------------|
|                                                                              |                     |           |                   | 3486; 387; 2050; 4312; 5058; 9112; 7058; 1462; 4326; 966; 1857; 388; 1293; 4853; 682; 4320; 1278; 7791; 390; 7057; 391; 3383; 3910; 1855; 5062; 3689; 1291; 2245                                                                                                                                                 |
| <b>Immune.FOS.JUN.IL<br/>6 TCGA.BRCA.1198<br/>JCI.2020<br/>PMID.32573490</b> | <b>Inflammation</b> | Signature | PMID.32<br>573490 | 8013; 3569; 9021; 467; 1959; 64651; 1843; 1958; 2354; 7538; 3164; 3725; 1839; 23645                                                                                                                                                                                                                              |
| <b>Macrophages.M0<br/>CIBERSORT<br/>NatMethods.2015<br/>PMID.25822800</b>    | <b>Macrophages</b>  | Signature | PMID.25<br>822800 | 366; 728; 968; 51313; 3101; 10261; 4688; 51296; 8876; 8740; 54; 27299; 79365; 79839; 6362; 6367; 6354; 1116; 1296; 1435; 2921; 6374; 1593; 81501; 2239; 8685; 4318; 7941; 5473; 25797; 56833; 84561; 54209                                                                                                       |
| <b>Macrophages.M1<br/>CIBERSORT<br/>NatMethods.2015<br/>PMID.25822800</b>    | <b>Macrophages</b>  | Signature | PMID.25<br>822800 | 366; 51296; 27299; 1116; 200315; 11026; 10288; 64127; 51284; 51311; 6352; 80830; 8651; 3902; 3559; 5739; 10563; 79931; 1236; 952; 43; 80833; 408; 6363; 6355; 958; 1193; 3627; 6373; 4283; 1594; 79132; 10148; 2687; 8820; 3620; 10964; 643314; 8942; 27074; 51365; 83937; 91543; 6614; 6504; 11182; 7130; 54795 |
| <b>Macrophages.M2<br/>CIBERSORT<br/>NatMethods.2015<br/>PMID.25822800</b>    | <b>Macrophages</b>  | Signature | PMID.25<br>822800 | 51296; 27299; 1116; 51311; 6355; 1193; 10148; 2687; 6614; 968; 51313; 6362; 54209; 199; 5199; 50856; 2242; 2535; 64231; 53829; 51314; 920; 246; 6357; 6358; 6368; 30835; 10462; 1414; 55691; 2952; 3269; 3357; 80896; 80380; 5973; 81029                                                                         |
| <b>Macrophages Bindea<br/>Immunity.2013<br/>PMID.24138885</b>                | <b>Macrophages</b>  | Signature | PMID.24<br>138885 | 348; 586; 950; 968; 1116; 1118; 1296; 1536; 2012; 2230; 2239; 2335; 2760; 3730; 4199; 4481; 5730; 6354; 6374; 6447; 6819; 8685; 8832; 9332; 10533; 23601; 26064; 26577; 51338; 58511; 81035; 259230; 1513                                                                                                        |
| <b>Macrophages.M2<br/>Ghassabeh<br/>Blood.2006<br/>PMID.16556895</b>         | <b>Macrophages</b>  | Signature | PMID.16<br>556895 | 383; 84666; 7941; 5660; 6414; 54209; 5376; 10462; 1118; 27159; 374868; 999; 2350                                                                                                                                                                                                                                 |

|                                                                                                     |                           |                  |                                |                                                                                                                                                                                                                                                                                                                                                                                                                                                                                                                                                                                                                                                                                                                                                                                                                    |
|-----------------------------------------------------------------------------------------------------|---------------------------|------------------|--------------------------------|--------------------------------------------------------------------------------------------------------------------------------------------------------------------------------------------------------------------------------------------------------------------------------------------------------------------------------------------------------------------------------------------------------------------------------------------------------------------------------------------------------------------------------------------------------------------------------------------------------------------------------------------------------------------------------------------------------------------------------------------------------------------------------------------------------------------|
| <p><b>Macrophages.Th1.CI<br/>uster Iglesia<br/>CCR.2014<br/>PMID.24916698</b></p>                   | <p><b>Macrophages</b></p> | <p>Signature</p> | <p>PMID.24<br/>916698</p>      | <p>26191; 5330; 50856; 3111;<br/>752; 117289; 5552; 1436;<br/>945; 713; 714; 712; 1520;<br/>146722; 3394; 388325;<br/>4332; 313; 57705; 8832;<br/>22797; 1536; 5294; 11309;<br/>3113; 3115; 3122; 3109;<br/>3108; 972; 64092; 219972;<br/>7133; 9938; 257106;<br/>84433; 64231; 64098;<br/>8477; 80231; 3594;<br/>286336; 221472; 6404;<br/>951; 3059; 7454; 4689;<br/>3689; 83706; 6688; 4542;<br/>27128; 79626; 199; 7940;<br/>124460; 695; 3937; 5788;<br/>2124; 3071; 963; 5341;<br/>920; 54440; 3587; 1794;<br/>2533; 10320; 1234; 6693;<br/>64333; 10859; 11006;<br/>2207; 9056; 3903; 84868;<br/>7805; 942; 23533; 139716;<br/>64926; 147138; 89857;<br/>54518; 6503; 3635;<br/>126364; 27180; 27036;<br/>968; 3687; 55803; 719;<br/>2123; 7456; 10875; 10261;<br/>10288; 51411; 89790;<br/>51311; 6039</p> |
| <p><b>Macrophages.Immun<br/>eProfiles.Mouse.Hu<br/>man Shay<br/>PNAS.2013<br/>PMID.23382184</b></p> | <p><b>Macrophages</b></p> | <p>Signature</p> | <p>PMID.23<br/>382184</p>      | <p>136; 526; 719; 1026; 1051;<br/>1317; 1436; 1462; 1508;<br/>1827; 1848; 1861; 2131;<br/>4035; 5271; 5326; 6051;<br/>6237; 6256; 6614; 7045;<br/>7056; 7133; 7941; 8522;<br/>8754; 9056; 9732; 9777;<br/>9935; 10577; 10855;<br/>10924; 22918; 26509;<br/>51311; 55022; 55160;<br/>55486; 64127; 206358;<br/>219654</p>                                                                                                                                                                                                                                                                                                                                                                                                                                                                                           |
| <p><b>Macrophages<br/>Charoentong<br/>CellRep.2017<br/>PMID.28052254</b></p>                        | <p><b>Macrophages</b></p> | <p>Signature</p> | <p>PMID.28<br/>052254</p>      | <p>1268; 1269; 3101; 3269;<br/>2206; 199; 10409; 6346;<br/>6358; 6368; 10344;<br/>124599; 920; 1414; 10209;<br/>1973; 51313; 2242; 2357;<br/>2358; 23401; 55691; 2535;<br/>2850; 27202; 3176; 10261;<br/>80896; 6036; 51296;<br/>51314; 8876; 81029</p>                                                                                                                                                                                                                                                                                                                                                                                                                                                                                                                                                            |
| <p><b>Macrophages.Monoc<br/>ytes.CSF1.Response<br/>Beck CCR.2009<br/>PMID.19188147</b></p>          | <p><b>Macrophages</b></p> | <p>Signature</p> | <p>PMID.<br/>1918814<br/>7</p> | <p>113; 241; 272; 341; 348;<br/>55843; 409; 567; 695;<br/>80183; 79630; 719; 834;<br/>6347; 6352; 9034; 9332;<br/>945; 962; 1043; 963; 8832;<br/>942; 925; 976; 51816;</p>                                                                                                                                                                                                                                                                                                                                                                                                                                                                                                                                                                                                                                         |

|                                                                                  |                    |           |                   |                                                                                                                                                                                                                                                                                                                                                                                                                                                                                                                                                          |
|----------------------------------------------------------------------------------|--------------------|-----------|-------------------|----------------------------------------------------------------------------------------------------------------------------------------------------------------------------------------------------------------------------------------------------------------------------------------------------------------------------------------------------------------------------------------------------------------------------------------------------------------------------------------------------------------------------------------------------------|
|                                                                                  |                    |           |                   | 11151; 54504; 1436; 1075; 1520; 10659; 7852; 1536; 1612; 1794; 2123; 2124; 2207; 2209; 2212; 2213; 2214; 10875; 2268; 2313; 752; 23048; 2359; 2533; 55303; 79158; 10457; 3055; 3059; 3108; 3123; 23526; 3428; 10437; 10320; 3587; 3606; 3575; 3689; 3903; 7805; 3936; 3937; 10184; 11006; 4033; 7940; 9450; 4067; 4069; 10461; 4332; 4354; 4478; 4542; 4688; 3071; 10577; 80896; 26031; 5294; 5336; 5341; 9595; 5788; 9770; 83937; 6039; 864; 25939; 64092; 6402; 6404; 10019; 6507; 9056; 11262; 6850; 6916; 7097; 7128; 7133; 10673; 11326; 7456; 1514 |
| <b>Macrophages<br/>ImSig.Nirmal<br/>CancerImmunoIRes.<br/>2018 PMID.30266715</b> | <b>Macrophages</b> | Signature | PMID.30<br>266715 | 59342; 140; 4481; 51393; 6688; 51311; 55281; 9034; 313; 4125; 2215; 79895; 58475; 3903; 728; 23643; 1240; 597; 51816; 1520; 9332; 712; 10261; 713; 942; 10673; 409; 11006; 4332; 7941; 1508; 11326; 7127; 29887; 719; 1230; 27128; 10437; 3689; 2359; 64747; 79630; 972; 3684; 968; 7133; 1890; 7805; 3687; 2209; 3101; 2210; 80301; 2207; 3128; 920; 717; 1318; 10457; 7305; 10062; 1436; 51338; 3988; 6916; 80896; 3071; 4542; 56833; 11309; 1536; 11314; 64581; 1806; 2212; 51296; 27299                                                              |
| <b>Immune.GIMAP.IL16<br/>TCGA.BRCA.1198<br/>JCI.2020<br/>PMID.32573490</b>       | <b>Macrophages</b> | Signature | PMID.32<br>573490 | 54518; 55843; 1439; 9938; 170371; 1193; 2313; 55303; 168537; 474344; 55340; 4242; 139716; 7133; 4033; 10875; 219972; 3635; 3603                                                                                                                                                                                                                                                                                                                                                                                                                          |
| <b>Mast.cells.Activated<br/>CIBERSORT<br/>NatMethods.2015<br/>PMID.25822800</b>  | <b>Mastocytes</b>  | Signature | PMID.25<br>822800 | 945; 2205; 84561; 8809; 671; 932; 6003; 79895; 1178; 1215; 1359; 1511; 3067; 27306; 2206; 4602; 50508; 4914; 5023; 5553; 5874; 29091; 7177; 6364; 6346; 2921; 3002; 1437; 6351; 3562; 3198; 3552;                                                                                                                                                                                                                                                                                                                                                        |



|                                                                                  |                   |           |                   |                                                                                                                                                                                                                                                                                                                           |
|----------------------------------------------------------------------------------|-------------------|-----------|-------------------|---------------------------------------------------------------------------------------------------------------------------------------------------------------------------------------------------------------------------------------------------------------------------------------------------------------------------|
|                                                                                  |                   |           |                   | 3553; 9173; 3567; 81698; 115123; 7006                                                                                                                                                                                                                                                                                     |
| <b>Mast.cells.Resting<br/>CIBERSORT<br/>NatMethods.2015<br/>PMID.25822800</b>    | <b>Mastocytes</b> | Signature | PMID.25<br>822800 | 945; 2205; 84561; 8809; 2672; 671; 1088; 932; 6489; 6003; 26228; 9934; 9508; 154; 79895; 55589; 719; 1178; 1215; 1359; 10321; 1511; 79843; 400451; 3067; 27306; 4056; 2206; 4602; 50508; 4914; 5023; 54852; 5553; 5874; 23176; 29091; 7177                                                                                |
| <b>Mast.cells Bindea<br/>Immunity.2013<br/>PMID.24138885</b>                     | <b>Mastocytes</b> | Signature | PMID.24<br>138885 | 116; 190; 794; 946; 1088; 1215; 1359; 1511; 1991; 2206; 2624; 3067; 3248; 3815; 4013; 4353; 5553; 5742; 6571; 6886; 7177; 7857; 10257; 27306; 57419; 57460; 64499; 79083; 339524; 4129                                                                                                                                    |
| <b>Mast.cell<br/>Charoentong<br/>CellRep.2017<br/>PMID.28052254</b>              | <b>Mastocytes</b> | Signature | PMID.28<br>052254 | 1359; 9508; 55843; 1215; 1368; 1511; 1960; 2219; 2512; 3310; 3680; 29992; 5743; 6037; 6275; 27181; 6532                                                                                                                                                                                                                   |
| <b>MDSC.Granulocytic<br/>Youn<br/>LeukocBiol.2012<br/>PMID.21954284</b>          | <b>MDSC</b>       | Signature | PMID.21<br>954284 | 100; 9133; 820; 8698; 2298; 2330; 2354; 2812; 3512; 3929; 4048; 4057; 4155; 4353; 5004; 5657; 641371; 55143; 8434; 1687; 55; 1992; 51449; 11065; 27333; 29942; 57509; 3039; 140460; 932; 55796; 55789; 353189; 10420; 9055; 25903                                                                                         |
| <b>MDSC.Neutrophil<br/>Youn<br/>LeukocBiol.2012<br/>PMID.21954284</b>            | <b>MDSC</b>       | Signature | PMID.21<br>954284 | 894; 1154; 1234; 2919; 2921; 3383; 3557; 3569; 3627; 4023; 4323; 4502; 4794; 5196; 5900; 6275; 6281; 6354; 6385; 6648; 6696; 7057; 7124; 7185; 9641; 23328; 23657; 55686; 56895                                                                                                                                           |
| <b>MDSC.Tumor.Macro<br/>phages Schlecker<br/>JImmunol.2012<br/>PMID.23152559</b> | <b>MDSC</b>       | Signature | PMID.23<br>152559 | 6351; 6348; 6354; 338442; 5008; 10409; 6369; 383; 967; 1339; 9034; 6696; 10022; 7070; 4323; 5996; 3303; 29923; 3553; 339210; 2920; 4360; 4322; 2919; 467; 3932; 1026; 9047; 2012; 929; 28984; 1601; 10912; 6385; 4283; 23179; 29126; 4643; 1263; 58191; 8877; 1958; 713; 8870; 1154; 101; 7124; 4818; 730249; 3123; 3725; |

|                                                                               |                    |                  |                            |                                                                                                                                                                                                                                                                                                                                                                                                                                                                                                                                                                                                                                                                                                                                                                                                                                                                                                                                                                                                     |
|-------------------------------------------------------------------------------|--------------------|------------------|----------------------------|-----------------------------------------------------------------------------------------------------------------------------------------------------------------------------------------------------------------------------------------------------------------------------------------------------------------------------------------------------------------------------------------------------------------------------------------------------------------------------------------------------------------------------------------------------------------------------------------------------------------------------------------------------------------------------------------------------------------------------------------------------------------------------------------------------------------------------------------------------------------------------------------------------------------------------------------------------------------------------------------------------|
|                                                                               |                    |                  |                            | <p>93978; 64651; 22822;<br/> 7535; 1844; 7052; 93099;<br/> 3557; 5209; 1649; 9046;<br/> 3783; 6319; 388325; 7371;<br/> 714; 23767; 23646; 9518;<br/> 7538; 54498; 400916;<br/> 8294; 1266; 2155; 9619;<br/> 6513; 4000; 7167; 54855;<br/> 1843; 23166; 10938; 8531;<br/> 338339; 2867; 7185; 2584;<br/> 23645; 7422; 84709;<br/> 90637; 3162; 28966;<br/> 10630; 1847; 712; 26064;<br/> 5236; 23657; 23428;<br/> 84331; 7076; 415116;<br/> 8111; 10769; 11172; 8354;<br/> 3575; 90522; 112399;<br/> 81671; 84868; 171177;<br/> 84275; 1647; 84803; 3939;<br/> 9500; 290; 4794; 1846;<br/> 7852; 366; 3726; 5866;<br/> 6004; 124540</p>                                                                                                                                                                                                                                                                                                                                                              |
| <p><b>MDSC.Tumor<br/> Schlecker<br/> JImmunol.2012<br/> PMID.23152559</b></p> | <p><b>MDSC</b></p> | <p>Signature</p> | <p>PMID.23<br/> 152559</p> | <p>123; 290; 383; 467; 712;<br/> 713; 714; 817; 839; 929;<br/> 958; 1026; 1154; 1234;<br/> 1462; 1476; 1522; 1601;<br/> 1643; 1827; 1845; 1846;<br/> 1893; 1910; 1958; 2012;<br/> 2078; 2155; 2159; 2213;<br/> 2309; 2549; 2697; 2799;<br/> 2810; 2919; 2920; 3119;<br/> 3123; 3162; 3303; 3304;<br/> 3383; 3557; 3617; 3680;<br/> 3725; 4000; 4239; 4261;<br/> 4283; 4322; 4323; 4360;<br/> 4794; 5008; 5025; 5026;<br/> 5146; 5209; 5236; 5328;<br/> 5553; 5597; 5641; 5817;<br/> 5866; 5973; 5996; 6347;<br/> 6348; 6351; 6354; 6369;<br/> 6385; 6535; 6643; 6692;<br/> 6696; 7052; 7076; 7124;<br/> 7167; 7185; 7431; 7982;<br/> 8360; 8364; 8553; 8808;<br/> 8835; 8877; 8892; 8991;<br/> 9034; 9043; 9046; 9308;<br/> 9518; 9522; 9546; 9641;<br/> 9732; 9788; 9797; 9934;<br/> 9953; 10046; 10062;<br/> 10268; 10312; 10417;<br/> 10457; 10461; 10493;<br/> 10630; 10915; 11172;<br/> 11186; 11238; 11282;<br/> 11316; 11346; 22862;<br/> 23049; 23099; 23166;<br/> 23179; 23207; 23216;</p> |

|                                                                         |             |           |                   |                                                                                                                                                                                                                                                                                                                                                                                                                                                                                                                                                                                                                                                                |
|-------------------------------------------------------------------------|-------------|-----------|-------------------|----------------------------------------------------------------------------------------------------------------------------------------------------------------------------------------------------------------------------------------------------------------------------------------------------------------------------------------------------------------------------------------------------------------------------------------------------------------------------------------------------------------------------------------------------------------------------------------------------------------------------------------------------------------|
|                                                                         |             |           |                   | 23428; 23516; 23552; 23646; 23767; 25819; 25932; 25977; 26054; 26064; 27033; 27043; 28966; 29126; 29886; 29923; 29947; 29967; 30837; 50865; 51365; 51573; 51586; 54033; 54206; 54476; 54756; 54810; 54855; 55198; 55339; 55635; 55748; 55860; 55917; 56975; 57020; 57084; 57458; 57600; 58191; 59338; 64174; 64757; 64943; 65083; 79632; 79768; 80070; 80380; 80381; 80755; 80821; 81671; 84002; 84301; 84333; 84679; 84709; 84868; 90637; 91768; 93099; 93978; 112770; 116039; 127281; 128506; 140809; 145389; 151835; 157378; 160622; 161142; 171177; 196743; 222171; 259307; 285590; 339366; 342667; 376267; 377677; 388325; 388595; 401548; 415116; 642623 |
| <b>MDSC Charoentong<br/>CellRep.2017<br/>PMID.28052254</b>              | <b>MDSC</b> | Signature | PMID.28<br>052254 | 929; 5660; 729230; 914; 942; 7852; 2212; 2213; 2214; 83706; 63940; 10068; 3566; 3683; 3684; 64098; 5732; 80142; 6279; 6280                                                                                                                                                                                                                                                                                                                                                                                                                                                                                                                                     |
| <b>MHC.11genes Forero<br/>CancerImmunoIRes.<br/>2016 PMID.26980599</b>  | <b>MHC</b>  | Signature | PMID.26<br>980599 | 4261; 972; 3113; 3115; 3116; 3117; 3123; 3127; 3128; 1512; 8648; 100290966; 731247                                                                                                                                                                                                                                                                                                                                                                                                                                                                                                                                                                             |
| <b>MHC.24genes Forero<br/>CancerImmunoIRes.<br/>2016 PMID.26980599</b>  | <b>MHC</b>  | Signature | PMID.26<br>980599 | 4261; 972; 3113; 3115; 3116; 3117; 3123; 3127; 3128; 1512; 8648; 100290966; 731247; 913; 2217; 3861; 57121; 89846; 6844; 120892; 4154; 4916; 84265; 5730; 6451; 9760; 399472                                                                                                                                                                                                                                                                                                                                                                                                                                                                                   |
| <b>MHC.I Rody<br/>BreastCancerResear<br/>ch.2008<br/>PMID.19272155</b>  | <b>MHC</b>  | Signature | PMID.19<br>272155 | 3135; 3105; 3106; 3107; 3134                                                                                                                                                                                                                                                                                                                                                                                                                                                                                                                                                                                                                                   |
| <b>MHC.II Rody<br/>BreastCancerResear<br/>ch.2008<br/>PMID.19272155</b> | <b>MHC</b>  | Signature | PMID.19<br>272155 | 1520; 972; 3123; 3117; 3109; 3113; 3115; 3108; 3122; 3937; 5552; 5788                                                                                                                                                                                                                                                                                                                                                                                                                                                                                                                                                                                          |

|                                                                                            |                  |           |                   |                                                                                                                                                                                                                                                                                                                                                                           |
|--------------------------------------------------------------------------------------------|------------------|-----------|-------------------|---------------------------------------------------------------------------------------------------------------------------------------------------------------------------------------------------------------------------------------------------------------------------------------------------------------------------------------------------------------------------|
| <b>MHC.I.CoreGenes<br/>Lauss<br/>NatCommun.2017<br/>PMID29170503</b>                       | <b>MHC</b>       | Signature | PMID.29<br>170503 | 3105; 3106; 3107; 6891;<br>84166; 6890; 5698; 5696;<br>567                                                                                                                                                                                                                                                                                                                |
| <b>CD68.Cluster Iglesia<br/>CCR.2014<br/>PMID.24916698</b>                                 | <b>Monocytes</b> | Signature | PMID.24<br>916698 | 126364; 27180; 27036;<br>968; 3687; 55803; 719                                                                                                                                                                                                                                                                                                                            |
| <b>Monocytes<br/>CIBERSORT<br/>NatMethods.2015<br/>PMID.25822800</b>                       | <b>Monocytes</b> | Signature | PMID.25<br>822800 | 8875; 2354; 199; 200315;<br>366; 432; 433; 683; 728;<br>729230; 912; 945; 968;<br>978; 5199; 51363; 50856;<br>64581; 9586; 1441; 51313;<br>2219; 2242; 2357; 2535;<br>3055; 3101; 3176; 10855;<br>10261; 11027; 11026;<br>10288; 7940; 4210; 4332;<br>64231; 4688; 4778;<br>114548; 64127; 53829;<br>23569; 6036; 6039; 6283;<br>51296; 7097; 51284;<br>51311; 7380; 8876 |
| <b>Tcells.Effector.Memo<br/>ry Bindea<br/>Immunity.2013<br/>PMID.24138885</b>              | <b>Monocytes</b> | Signature | PMID.24<br>138885 | 1231; 2130; 2313; 4058;<br>4210; 4776; 5616; 6904;<br>6955; 7430; 9779; 10000;<br>10521; 27099; 81544                                                                                                                                                                                                                                                                     |
| <b>Monocytes.Dendritic.<br/>cell.Metagene Miller<br/>GenomeBiol.2013<br/>PMID.23618380</b> | <b>Monocytes</b> | Signature | PMID.23<br>618380 | 3113; 7940; 3133; 3115;<br>3119; 3108; 3122; 3123;<br>972                                                                                                                                                                                                                                                                                                                 |
| <b>Monocytes<br/>Charoentong<br/>CellRep.2017<br/>PMID.28052254</b>                        | <b>Monocytes</b> | Signature | PMID.28<br>052254 | 1072; 4155; 71; 308; 432;<br>433; 526; 912; 5199; 1486;<br>9802; 326342; 3097;<br>10320; 65108; 4324;<br>10908; 10084; 51368;<br>7009; 7380                                                                                                                                                                                                                               |
| <b>Monocytes<br/>ImSig.Nirmal<br/>CancerImmunoRes.<br/>2018 PMID.30266715</b>              | <b>Monocytes</b> | Signature | PMID.30<br>266715 | 7940; 2268; 199; 7077;<br>2242; 9056; 22918; 1200;<br>3162; 2219; 7045; 23313;<br>79168; 29108; 5265; 391;<br>29992; 5660; 3055;<br>150372; 84034; 126364;<br>57085; 2799; 4853; 10288;<br>11025; 2896; 945; 84106;<br>84898; 1509; 146722;<br>1462; 9473; 64115; 929                                                                                                     |
| <b>Monocytes.Dendritic.<br/>25genes Miller<br/>GenomeBiol.2013<br/>PMID.23618380</b>       | <b>Monocytes</b> | Signature | PMID.23<br>618380 | 241; 920; 972; 1436; 1536;<br>1794; 2123; 2124; 10875;<br>3109; 3113; 3115; 3117;<br>3119; 3122; 3123; 3133;<br>7462; 7940; 5788; 5552;<br>3118; 3127; 3128; 3108                                                                                                                                                                                                         |
| <b>CSF1.Response<br/>TCGA Immunity.2018<br/>PMID.29628290</b>                              | <b>Monocytes</b> | Signature | PMID.29<br>628290 | 11151; 4332; 9034; 9056;<br>3108; 2533; 6039; 7097;<br>1075; 11006; 9595; 1520;<br>83937; 4478; 1536; 7805;                                                                                                                                                                                                                                                               |

|                                                                                            |                    |           |                   |                                                                                                                                                                                                                                                                                                                                                                                                                                                                                                                                                                                                                       |
|--------------------------------------------------------------------------------------------|--------------------|-----------|-------------------|-----------------------------------------------------------------------------------------------------------------------------------------------------------------------------------------------------------------------------------------------------------------------------------------------------------------------------------------------------------------------------------------------------------------------------------------------------------------------------------------------------------------------------------------------------------------------------------------------------------------------|
|                                                                                            |                    |           |                   | 1794; 2209; 2124; 113; 962; 55843; 409; 6850; 695; 7128; 2212; 11326; 2359; 3587; 3428; 3689; 3575; 6916; 752; 2313; 9770; 4069; 9332; 976; 6347; 2213; 10461; 8832; 963; 942; 23526; 1514; 2123; 7133; 7852; 3936; 25939; 54504; 3123; 80183; 55303; 64092; 5336; 26031; 925; 864; 2214; 272; 4542; 51816; 4067; 4354; 4033; 10875; 3071; 3059; 6402; 834; 6404; 945; 10457; 4688; 23048; 3606; 567; 11262; 2207; 3937; 9450; 3903; 10437; 10673; 7929; 79407929; 7940; 2268; 80896; 5341; 6352; 5788; 79158; 6507; 3055; 10577; 719; 5294; 1612; 241; 1436; 10659; 348; 341; 1043; 10184; 79630; 10320; 10019; 7456 |
| <b>Immune.CD34.TIE1<br/>TCGA.BRCA.1198<br/>JCI.2020<br/>PMID.32573490</b>                  | <b>Monocytes</b>   | Signature | PMID.32<br>573490 | 54810; 6403; 5243; 9452; 22915; 6358; 857; 6886; 79843; 22918; 2078; 947; 1003; 80177; 1901; 7075; 10252; 128553; 5168                                                                                                                                                                                                                                                                                                                                                                                                                                                                                                |
| <b>HCK Rody<br/>BreastCancerResear<br/>ch.2008<br/>PMID.19272155</b>                       | <b>Monocytes</b>   | Signature | PMID.19<br>272155 | 64231; 11309; 51338; 7940; 199; 7305; 1794; 2207; 6039; 9056; 4332; 4688; 713; 7805; 10437; 22797; 9332; 3903; 942; 3689; 3055; 712; 1230                                                                                                                                                                                                                                                                                                                                                                                                                                                                             |
| <b>Influenza.11genes<br/>Khatri Immunity.2015<br/>PMID.26682989</b>                        | <b>Monocytes</b>   | Signature | PMID.26<br>682989 | 952; 51191; 55008; 2537; 64135; 3959; 4061; 4599; 64761; 64108; 81030                                                                                                                                                                                                                                                                                                                                                                                                                                                                                                                                                 |
| <b>Neutrophils.Activate<br/>d.Blood Janiszewska<br/>NatCellBiol.2019<br/>PMID.31263265</b> | <b>Neutrophils</b> | Signature | PMID.31<br>263265 | 3043; 1514; 3039; 2791; 3043; 10398; 2815; 11313; 27013; 928; 51635; 10482; 3655; 5473; 1191; 8294; 10170; 64805; 65213; 4201; 6840; 11182; 3555; 7850; 653361; 5196; 3181; 84419; 6503; 3040; 4601; 820; 4792; 4282; 1831; 4001; 65125; 51274; 1611; 9246; 11345; 89875; 3187; 51499; 976; 4940; 259230; 26469; 23521; 54625; 54926; 51206; 4713; 6467; 7979; 128346; 10924; 6271; 3480; 5269; 1475;                                                                                                                                                                                                                 |

|                                                                                                     |                           |                  |                            |                                                                                                                                                                                                                                                                                                                                                                                                                                                                                                                                                                                                                                                                                                                                                                                                                                                                                                                                                                                                             |
|-----------------------------------------------------------------------------------------------------|---------------------------|------------------|----------------------------|-------------------------------------------------------------------------------------------------------------------------------------------------------------------------------------------------------------------------------------------------------------------------------------------------------------------------------------------------------------------------------------------------------------------------------------------------------------------------------------------------------------------------------------------------------------------------------------------------------------------------------------------------------------------------------------------------------------------------------------------------------------------------------------------------------------------------------------------------------------------------------------------------------------------------------------------------------------------------------------------------------------|
|                                                                                                     |                           |                  |                            | <p>10906; 1075; 217; 6146;<br/> 6733; 91543; 64500;<br/> 283349; 2214; 6137;<br/> 10541; 8848; 27086; 6233;<br/> 85027; 10260; 4726;<br/> 11329; 51324; 2280; 2289;<br/> 26262; 9034; 1116; 10390;<br/> 23118; 7430; 1647; 29780;<br/> 55602; 2098; 90355; 6191;<br/> 9636; 51266; 22889; 6001;<br/> 7090; 6205; 11079; 1656;<br/> 506; 57533; 3840; 517;<br/> 9588; 6130; 8407; 50486;<br/> 6210; 10294; 3958; 9595;<br/> 6009; 8493; 8347; 2014;<br/> 51194; 10959; 125965;<br/> 2812; 903; 57018; 9289;<br/> 5688; 23528; 2123;<br/> 196264; 5577; 94097;<br/> 6161; 9541; 1990; 10634;<br/> 6228; 55500; 11243;<br/> 83662; 60685; 2920; 4540</p>                                                                                                                                                                                                                                                                                                                                                       |
| <p><b>Neutrophils.Activate<br/> d.Lung Janiszewska<br/> NatCellBiol.2019<br/> PMID.31263265</b></p> | <p><b>Neutrophils</b></p> | <p>Signature</p> | <p>PMID.31<br/> 263265</p> | <p>467; 8832; 79145; 143384;<br/> 115817; 3265; 80153;<br/> 92241; 123; 6222; 84919;<br/> 9698; 10905; 334; 23741;<br/> 2778; 51324; 23048;<br/> 10999; 63935; 1479;<br/> 11052; 22898; 54542;<br/> 7884; 258010; 23360;<br/> 63931; 64961; 23412;<br/> 5711; 58476; 26292; 4520;<br/> 9686; 1613; 7704; 85439;<br/> 26156; 9748; 56688; 5439;<br/> 9169; 6856; 10011; 6414;<br/> 64965; 79095; 151188;<br/> 10010; 5782; 4938; 3656;<br/> 55180; 60626; 388272;<br/> 4597; 64943; 4200; 8260;<br/> 139716; 84265; 8295;<br/> 255967; 119504; 22862;<br/> 5771; 9658; 23602; 57175;<br/> 79077; 6137; 10923; 1175;<br/> 54522; 91373; 10906;<br/> 2631; 79705; 55331; 9274;<br/> 203328; 4671; 51527;<br/> 4677; 8199; 84557; 3692;<br/> 10451; 11021; 51028;<br/> 51021; 64959; 2314; 4214;<br/> 4089; 51315; 3397; 53938;<br/> 3028; 1435; 79982; 6497;<br/> 389203; 55144; 155185;<br/> 79042; 4205; 5428; 1431;<br/> 5376; 140735; 22890;<br/> 51586; 7936; 79143; 1656;<br/> 29896; 196264; 54407;</p> |

|                                                                                               |                    |           |                   |                                                                                                                                                                                                                                                                                                                                                                                                                                      |
|-----------------------------------------------------------------------------------------------|--------------------|-----------|-------------------|--------------------------------------------------------------------------------------------------------------------------------------------------------------------------------------------------------------------------------------------------------------------------------------------------------------------------------------------------------------------------------------------------------------------------------------|
|                                                                                               |                    |           |                   | 23476; 8655; 2533; 23168;<br>79637; 10527; 64777;<br>10713; 1192; 57620;<br>91746; 4659; 56259;<br>84306; 8575; 81704; 6503;<br>59339; 80790; 122622;<br>7534; 8344; 5048; 55904;<br>65117; 57140; 58159;<br>10625; 10857; 9061;<br>51499; 9683; 136647;<br>54069; 81555                                                                                                                                                             |
| <b>Neutrophils<br/>CIBERSORT<br/>NatMethods.2015<br/>PMID.25822800</b>                        | <b>Neutrophils</b> | Signature | PMID.25<br>822800 | 1178; 9934; 4688; 53829;<br>23569; 8807; 8972; 26030;<br>64174; 30817; 84658;<br>2867; 222487; 4117; 4084;<br>9185; 79865; 7130; 199;<br>10261; 1116; 51311; 5199;<br>366; 200315; 10288; 728;<br>8876; 25797; 8875; 978;<br>51363; 9586; 1441; 2357;<br>11027; 7940; 4210; 4332;<br>4778; 6283; 7097; 820;<br>79908; 838; 1232; 1084;<br>3577; 3579; 55924; 2215;<br>2358; 3034; 3310; 64386;<br>8993; 79689; 8794; 54210;<br>55350 |
| <b>Neutrophils Bindea<br/>Immunity.2013<br/>PMID.24138885</b>                                 | <b>Neutrophils</b> | Signature | PMID.24<br>138885 | 249; 683; 1084; 1441;<br>2204; 2215; 2357; 2358;<br>3577; 3579; 3772; 4051;<br>4311; 5142; 6283; 6583;<br>8291; 8347; 8778; 8794;<br>8972; 9586; 9895; 10288;<br>10855; 22918; 50486;<br>51312; 55313; 55350;<br>83716                                                                                                                                                                                                               |
| <b>Granulocytes.Immun<br/>eProfiles.Mouse.Hu<br/>man Shay<br/>PNAS.2013<br/>PMID.23382184</b> | <b>Neutrophils</b> | Signature | PMID.23<br>382184 | 306; 366; 383; 526; 706;<br>719; 728; 820; 928; 929;<br>1116; 1436; 1441; 1675;<br>2896; 3082; 3162; 3176;<br>3934; 4057; 4814; 4973;<br>5154; 5329; 5724; 6280;<br>6403; 6688; 6813; 6916;<br>7057; 7077; 7097; 7099;<br>7130; 8301; 8972; 9764;<br>9826; 10159; 10170;<br>10457; 10562; 10634;<br>11237; 23569; 23601;<br>26253; 50486; 51257;<br>51311; 51734; 54210;<br>55350; 55625; 55647;<br>55793; 56729; 79689;<br>83716    |
| <b>Neutrophils.MCP<br/>Petitprez</b>                                                          | <b>Neutrophils</b> | Signature | PMID.31<br>942077 | 762; 1084; 3577; 3579;<br>4051; 2215; 3034; 3772;                                                                                                                                                                                                                                                                                                                                                                                    |

|                                                                                  |                    |           |                   |                                                                                                                                                                                                                                                                                                                                                                                                                          |
|----------------------------------------------------------------------------------|--------------------|-----------|-------------------|--------------------------------------------------------------------------------------------------------------------------------------------------------------------------------------------------------------------------------------------------------------------------------------------------------------------------------------------------------------------------------------------------------------------------|
| <b>Nature.2020<br/>PMID.31942077</b>                                             |                    |           |                   | 1955; 51312; 79689; 9895;<br>7090; 8794; 55350                                                                                                                                                                                                                                                                                                                                                                           |
| <b>Neutrophils<br/>Charoentong<br/>CellRep.2017<br/>PMID.28052254</b>            | <b>Neutrophils</b> | Signature | PMID.28<br>052254 | 4117; 64386; 200315;<br>79908; 55924; 838; 978;<br>51363; 9586; 3577; 3579;<br>2867; 3034; 8972; 6283;<br>79689; 8794; 55350                                                                                                                                                                                                                                                                                             |
| <b>Neutrophils<br/>ImSig.Nirmal<br/>CancerImmunolRes.<br/>2018 PMID.30266715</b> | <b>Neutrophils</b> | Signature | PMID.30<br>266715 | 10135; 23258; 10154;<br>6279; 366; 10581; 57580;<br>6280; 85464; 6777; 2357;<br>7097; 84984; 3579; 7099;<br>3759; 23765; 9750; 7132;<br>399844; 2180; 8291;<br>11027; 201799; 126308;<br>5899; 1441; 604; 284996;<br>1912; 8837; 144423;<br>80216; 3985; 4689; 11240;<br>10409; 6774; 7056; 9103;<br>8972; 51317; 51312;<br>692205                                                                                       |
| <b>NK.Activated<br/>CIBERSORT<br/>NatMethods.2015<br/>PMID.25822800</b>          | <b>NK cells</b>    | Signature | PMID.25<br>822800 | 919; 3932; 4068; 3004;<br>3560; 3820; 79037; 3002;<br>6352; 3001; 8530; 10578;<br>2999; 3824; 22914; 5551;<br>5729; 28526; 51744; 8807;<br>7535; 10225; 924; 5790;<br>4818; 3595; 1521; 3823;<br>51348; 8809; 3802; 3812;<br>10004; 79899; 53637;<br>30009; 7294; 29909; 2841;<br>1803; 4050; 4049; 969;<br>1437; 3458; 9402; 5732;<br>259197; 60489; 80830;<br>6351; 894; 1021; 356;<br>3805; 3809; 5008; 8651;<br>8740 |
| <b>NK.Resting<br/>CIBERSORT<br/>NatMethods.2015<br/>PMID.25822800</b>            | <b>NK cells</b>    | Signature | PMID.25<br>822800 | 914; 919; 3932; 4068;<br>3004; 28639; 3560; 3820;<br>79037; 3002; 6352; 3001;<br>3003; 8530; 10578; 2999;<br>3824; 22914; 5551; 5729;<br>28526; 11126; 51744;<br>2672; 8807; 7535; 10225;<br>924; 5790; 4818; 3595;<br>1521; 3823; 8302; 51348;<br>566; 671; 820; 92211;<br>1088; 1669; 1991; 8809;<br>3802; 3812; 8972; 932;<br>10004; 51314; 79156;<br>79899; 53637; 30009;<br>7011; 55020; 7294; 7694                 |
| <b>NK.CD56bright<br/>Bindea<br/>Immunity.2013<br/>PMID.24138885</b>              | <b>NK cells</b>    | Signature | PMID.24<br>138885 | 758; 1846; 2302; 6236;<br>6375; 8398; 8567; 10299;<br>57876; 83696; 254531                                                                                                                                                                                                                                                                                                                                               |



|                                                                                |                 |           |                   |                                                                                                                                                                                                                                                                                            |
|--------------------------------------------------------------------------------|-----------------|-----------|-------------------|--------------------------------------------------------------------------------------------------------------------------------------------------------------------------------------------------------------------------------------------------------------------------------------------|
| <b>NK.CD56dim Bindea<br/>Immunity.2013<br/>PMID.24138885</b>                   | <b>NK cells</b> | Signature | PMID.24<br>138885 | 2975; 3002; 3804; 3806;<br>3807; 3810; 3811; 3812;<br>3813; 10417; 50615;<br>53637; 55020; 56937;<br>115653                                                                                                                                                                                |
| <b>NK Bindea<br/>Immunity.2013<br/>PMID.24138885</b>                           | <b>NK cells</b> | Signature | PMID.24<br>138885 | 104; 219; 323; 596; 988;<br>2527; 2574; 2778; 3488;<br>5710; 6375; 6693; 6846;<br>6915; 7755; 8572; 8817;<br>8888; 9437; 9902; 11155;<br>22924; 25959; 27308;<br>51343; 55503; 55671;<br>57716; 64129; 64225;<br>64924; 65988; 79867;<br>84436; 259230; 643313;<br>730096                  |
| <b>Tcells.Central.Memor<br/>y Bindea<br/>Immunity.2013<br/>PMID.24138885</b>   | <b>NK cells</b> | Signature | PMID.24<br>138885 | 360; 472; 841; 1540; 1678;<br>2533; 3187; 4214; 4297;<br>4747; 4775; 5108; 6482;<br>6638; 7294; 8287; 8556;<br>8675; 8821; 9057; 9397;<br>11278; 22990; 23059;<br>23177; 23348; 55729;<br>58487; 80012; 80342;<br>85021; 202134; 246721;<br>283970; 441155; 116828;<br>27086; 55269; 84663 |
| <b>NK.ImmuneProfiles.<br/>Mouse.Human Shay<br/>PNAS.2013<br/>PMID.23382184</b> | <b>NK cells</b> | Signature | PMID.23<br>382184 | 598; 864; 1521; 2151;<br>3001; 3140; 3458; 3560;<br>3673; 3824; 3982; 4818;<br>5782; 6574; 7008; 8459;<br>8530; 8807; 8809; 9437;<br>11030; 11092; 11126;<br>11145; 11178; 11285;<br>30009; 54438; 54843;<br>79158; 81563; 83988;<br>254531                                                |
| <b>NK.CD56bright<br/>Charoentong<br/>CellRep.2017<br/>PMID.28052254</b>        | <b>NK cells</b> | Signature | PMID.28<br>052254 | 1001; 10866; 3067; 18;<br>64919; 56935; 56951;<br>92211; 1193; 9167;<br>148327; 1435; 1459; 1475;<br>1476; 1503; 1509; 1594;<br>25853; 8655; 10480;<br>84173; 957; 151194;<br>165186; 10468; 2624;<br>2766; 7107; 84717; 23462;<br>3198; 9653; 9957; 3892;<br>64223; 140465; 79612         |
| <b>NK.CD56dim<br/>Charoentong<br/>CellRep.2017<br/>PMID.28052254</b>           | <b>NK cells</b> | Signature | PMID.28<br>052254 | 2902; 3806; 100132285;<br>3810; 22977; 1593; 57696;<br>8445; 55890; 3133; 50615;<br>4854; 64840; 5704; 6168;<br>7378                                                                                                                                                                       |
| <b>NK Charoentong<br/>CellRep.2017<br/>PMID.28052254</b>                       | <b>NK cells</b> | Signature | PMID.28<br>052254 | 729447; 2635; 7940;<br>10000; 558; 596; 684; 988;<br>1000; 56253; 1438; 1522;                                                                                                                                                                                                              |

|                                                                         |                     |           |                   |                                                                                                                                                                                                                                                                                                                                                                       |
|-------------------------------------------------------------------------|---------------------|-----------|-------------------|-----------------------------------------------------------------------------------------------------------------------------------------------------------------------------------------------------------------------------------------------------------------------------------------------------------------------------------------------------------------------|
|                                                                         |                     |           |                   | 2919; 9267; 1616; 160851; 54567; 1806; 2065; 50848; 100132948; 81553; 356; 2209; 8817; 2335; 11167; 2517; 2527; 51343; 27165; 2885; 3488; 25959; 11155                                                                                                                                                                                                                |
| <b>NK.Tcell<br/>Charoentong<br/>CellRep.2017<br/>PMID.28052254</b>      | <b>NK cells</b>     | Signature | PMID.28<br>052254 | 3802; 3809; 3812; 6696; 10385; 55704; 9398; 135228; 51267; 10695; 245812; 1385; 200186; 64784; 1437; 2015; 8061; 2526; 3308; 126393; 3384; 9235; 145501; 3698; 23081; 3804; 3811; 84623; 3821; 10219; 3920; 10990; 4277; 9437; 84901; 10630; 6386; 9056; 7056; 54209; 85480; 53347; 7412; 51087                                                                       |
| <b>NK ImSig.Nirmal<br/>CancerImmunoIRes.<br/>2018 PMID.30266715</b>     | <b>NK cells</b>     | Signature | PMID.30<br>266715 | 8302; 5551; 3822; 3823; 57292; 3810; 30009; 100132285; 3806; 3808; 154075; 115653; 3802; 3804; 117157; 3824; 3803; 3811; 3812; 3805                                                                                                                                                                                                                                   |
| <b>NK.MCP Helmink<br/>Nature.2020<br/>PMID.31942077</b>                 | <b>NK cells</b>     | Signature | PMID.31<br>942077 | 11126; 3802; 3804; 3805; 3811; 3813; 9437; 5729; 117157                                                                                                                                                                                                                                                                                                               |
| <b>Bcells.Plasmablast<br/>Dybaer JCO.2015<br/>PMID.25800755</b>         | <b>Plasma cells</b> | Signature | PMID.25<br>800755 | 639; 857; 999; 1534; 2081; 2487; 2549; 3493; 3537; 3655; 3662; 4121; 4189; 4695; 7421; 7494; 8339; 8343; 8344; 8346; 8347; 8349; 8970; 9236; 10788; 10802; 10970; 22862; 22936; 23446; 23710; 23766; 28396; 28831; 51237; 51303; 54502; 54855; 55132; 57823; 64764; 64778; 79694; 91319; 115908; 144535; 151556; 160428; 317649; 340542; 645784; 100533483; 101928615 |
| <b>Plasma.cells<br/>CIBERSORT<br/>NatMethods.2015<br/>PMID.25822800</b> | <b>Plasma cells</b> | Signature | PMID.25<br>822800 | 973; 79368; 91316; 3112; 3495; 3507; 3514; 91353; 5026; 5368; 150094; 939; 160518; 2788; 80008; 608; 55840; 23457; 270; 51378; 6315; 79703; 2826; 952; 2848; 3012; 8339; 3497; 3738; 26251; 54923; 100130100; 4121; 79694; 22983; 374977; 51237; 5081; 5163; 25780; 5972; 6003; 642741; 6676;                                                                         |

|                                                                                |                     |           |                |                                                                                                                                                                                                                                                                                                                                                                                                                                                                                                                                                                                                                                                             |
|--------------------------------------------------------------------------------|---------------------|-----------|----------------|-------------------------------------------------------------------------------------------------------------------------------------------------------------------------------------------------------------------------------------------------------------------------------------------------------------------------------------------------------------------------------------------------------------------------------------------------------------------------------------------------------------------------------------------------------------------------------------------------------------------------------------------------------------|
|                                                                                |                     |           |                | 27090; 9333; 7367; 81030; 7718                                                                                                                                                                                                                                                                                                                                                                                                                                                                                                                                                                                                                              |
| <b>Bcells.Plasma.cells. Metagene Miller GenomeBiol.2013 PMID.23618380</b>      | <b>Plasma cells</b> | Signature | PMID.23 618380 | 3537; 3500; 3507; 3493; 3492; 3514; 28831; 50802; 28823; 100293211; 5450; 608; 91316; 3495; 91353; 100423062                                                                                                                                                                                                                                                                                                                                                                                                                                                                                                                                                |
| <b>Plasma.cells ImSig.Nirmal CancerImmunolRes. 2018 PMID.30266715</b>          | <b>Plasma cells</b> | Signature | PMID.30 266715 | 3492; 3502; 28823; 91353; 81567; 91316; 51237; 28902; 608; 28831; 3546; 3514; 3537                                                                                                                                                                                                                                                                                                                                                                                                                                                                                                                                                                          |
| <b>STAT1 Rody BreastCancerResear ch.2008 PMID.19272155</b>                     | <b>STAT</b>         | Signature | PMID.19 272155 | 6890; 2633; 64135; 5698; 4283; 3659; 6373; 3627; 3620; 6772                                                                                                                                                                                                                                                                                                                                                                                                                                                                                                                                                                                                 |
| <b>Proliferation.Pathway ImSig.Nirmal CancerImmunolRes. 2018 PMID.30266715</b> | <b>T cells</b>      | Signature | PMID.30 266715 | 6491; 2146; 79733; 7272; 6790; 9212; 9232; 55388; 113115; 81620; 9134; 11004; 55143; 83879; 11339; 55215; 157313; 55789; 7153; 113130; 890; 259266; 83461; 9928; 983; 990; 3832; 51514; 56992; 22974; 51203; 84057; 55635; 55872; 4171; 11065; 1894; 4173; 5888; 4175; 29128; 4085; 6241; 11130; 554282; 6240; 701; 3925; 9833; 79801; 1163; 24137; 3149; 4751; 2305; 9768; 54443; 55165; 3161; 7083; 57405; 7298; 5427; 64151; 54892; 55355; 1058; 699; 26271; 220134; 55055; 10721; 9319; 9837; 51659; 91687; 10635; 4288; 51053; 9787; 83540; 146909; 1063; 991; 10403; 332; 1062; 29980; 1033; 29127; 10592; 891; 10733; 9133; 55010; 5111; 6941; 10112 |
| <b>Immune.CTLA4.CXC L.FOXP3 TCGA.BRCA.1198 JCI.2020 PMID.32573490.</b>         | <b>T cells</b>      | Signature | PMID.32 573490 | 1493; 6373; 3627; 4283; 3604; 50615; 56833; 50943; 3620; 94240; 2633                                                                                                                                                                                                                                                                                                                                                                                                                                                                                                                                                                                        |
| <b>CD8.Cluster Iglesia CCR.2014 PMID.24916698</b>                              | <b>T cells</b>      | Signature | PMID.24 916698 | 256380; 151888; 925; 3003; 29909; 128611; 5790; 374403; 10663; 4063; 9744; 27240; 201633; 3932; 55423; 919; 84174; 3702; 10225; 4068; 921; 916; 914; 915; 2833; 114836; 3561; 53347; 6504; 149628; 939; 50852;                                                                                                                                                                                                                                                                                                                                                                                                                                              |

|                                                                                             |                |           |                   |                                                                                                                                                                                                                                                                                                                                                                                                            |
|---------------------------------------------------------------------------------------------|----------------|-----------|-------------------|------------------------------------------------------------------------------------------------------------------------------------------------------------------------------------------------------------------------------------------------------------------------------------------------------------------------------------------------------------------------------------------------------------|
|                                                                                             |                |           |                   | 3001; 30009; 5778; 6352; 4818; 5551; 962; 154075; 917; 7535; 22914; 283897; 923; 5579; 8698                                                                                                                                                                                                                                                                                                                |
| <b>Tcells.CD8.MCP<br/>Petitprez<br/>Nature.2020<br/>PMID.31942077</b>                       | <b>T cells</b> | Signature | PMID.31<br>942077 | 926; 926; 926; 926                                                                                                                                                                                                                                                                                                                                                                                         |
| <b>Tcells.CD4.Memory.<br/>Activated<br/>CIBERSORT<br/>NatMethods.2015<br/>PMID.25822800</b> | <b>T cells</b> | Signature | PMID.25<br>822800 | 914; 919; 915; 917; 924; 1803; 29851; 3932; 4068; 28755; 50852; 53347; 959; 923; 29909; 4818; 940; 1493; 3002; 3902; 6364; 993; 1437; 10563; 2842; 3458; 3595; 3605; 55801; 3559; 3562; 3565; 3578; 4049; 4998; 5367; 9136; 220134; 7293; 79931                                                                                                                                                            |
| <b>Tcells.CD4.Memory.<br/>Resting CIBERSORT<br/>NatMethods.2015<br/>PMID.25822800</b>       | <b>T cells</b> | Signature | PMID.25<br>822800 | 939; 54923; 642741; 9214; 4050; 64919; 914; 919; 915; 917; 924; 1803; 2323; 9402; 3004; 29851; 3575; 3702; 3932; 51176; 4063; 4068; 55423; 6932; 28755; 50852; 28671; 28639; 53347; 7535; 10235; 959; 969; 5790; 6352; 916; 923; 10225; 1521; 29909; 3001; 3003; 3820; 4818; 22821; 2848; 1235; 940; 920; 1493; 1606; 2035; 2113; 55336; 57326; 5732; 11123; 140801; 6489; 28670; 28662; 28680; 28677; 678 |
| <b>Tcells.CD4.Naive<br/>CIBERSORT<br/>NatMethods.2015<br/>PMID.25822800</b>                 | <b>T cells</b> | Signature | PMID.25<br>822800 | 939; 54923; 642741; 9214; 4050; 64919; 914; 919; 915; 917; 924; 1803; 1823; 2323; 9402; 3004; 29851; 3575; 3702; 3932; 51176; 4063; 11184; 79884; 4068; 55423; 6932; 28755; 50852; 28671; 28639; 53347; 7535; 10235; 9744; 79722; 80162; 1236; 959; 55086; 2041; 79667; 79690; 2587; 2825; 27040; 5871; 26297; 50853; 7476; 7754; 25799                                                                    |
| <b>Tcells.CD8<br/>CIBERSORT<br/>NatMethods.2015<br/>PMID.25822800</b>                       | <b>T cells</b> | Signature | PMID.25<br>822800 | 3514; 939; 54923; 642741; 969; 9214; 4050; 5790; 64919; 6352; 914; 919; 915; 916; 917; 923; 924; 925; 926; 10225; 56253; 8530; 1521; 1803; 1823; 1844; 2323; 10578; 29909;                                                                                                                                                                                                                                 |

|                                                                         |                |           |                |                                                                                                                                                                                                                                                                                                                                                                           |
|-------------------------------------------------------------------------|----------------|-----------|----------------|---------------------------------------------------------------------------------------------------------------------------------------------------------------------------------------------------------------------------------------------------------------------------------------------------------------------------------------------------------------------------|
|                                                                         |                |           |                | 9402; 3001; 3002; 2999; 3003; 3004; 29851; 3575; 3702; 3820; 3823; 8302; 3824; 51348; 22914; 3902; 3932; 51176; 4063; 11184; 79884; 259197; 4818; 113791; 5551; 5729; 79037; 22821; 4068; 55423; 6932; 28755; 50852; 28673; 28671; 28639; 28526; 53347; 7535                                                                                                              |
| <b>Tcells.Follicular.Helper CIBERSORT NatMethods.2015 PMID.25822800</b> | <b>T cells</b> | Signature | PMID.25 822800 | 914; 919; 915; 917; 924; 29851; 3932; 4068; 28755; 50852; 53347; 959; 1493; 3902; 10563; 2842; 4049; 7293; 939; 642741; 9214; 64919; 3004; 3702; 51176; 55423; 6932; 28671; 28639; 7535; 969; 5790; 3820; 1606; 6489; 28680; 28677; 11184; 79884; 80162; 27040; 79037; 150094; 643; 767; 1117; 2354; 7976; 3382; 59067; 23178; 5133; 5996; 56301; 28951; 7253; 65986      |
| <b>Tcells.Gamma.Delta CIBERSORT NatMethods.2015 PMID.25822800</b>       | <b>T cells</b> | Signature | PMID.25 822800 | 914; 919; 915; 917; 3932; 4068; 53347; 3004; 55423; 28639; 11184; 29909; 27240; 3560; 8631; 3902; 6932; 3820; 27040; 79037; 3002; 4063; 6352; 3001; 3003; 925; 926; 8530; 1844; 10578; 2999; 3824; 22914; 5551; 5729; 28526; 2841; 631; 9024; 1234; 11126; 51744; 11314; 1010; 8292; 10663; 2672; 2996; 8807; 10219; 442236; 3973; 4110; 26030; 6335; 643503; 8875; 79973 |
| <b>Tcells.Regulatory.Tregs CIBERSORT NatMethods.2015 PMID.25822800</b>  | <b>T cells</b> | Signature | PMID.25 822800 | 914; 919; 915; 917; 29851; 3932; 4068; 28755; 50852; 53347; 1493; 2842; 939; 64919; 3004; 3702; 55423; 28639; 7535; 1606; 28677; 11184; 1803; 923; 29909; 940; 3559; 5367; 4050; 916; 10225; 920; 11123; 2825; 4153; 27240; 8538; 921; 970; 752014; 29121; 1946; 50943; 83786; 3090; 203510; 3560; 55243; 3904; 23547; 126987; 4861; 4917; 56143; 9651;                   |

|                                                                                           |                |           |                   |                                                                                                                                                                                                                                                                                                                                                                                                                                                                                                                                                                                                                                                                                                                                                                                                                                                                                                                                                                                                                                                                                                         |
|-------------------------------------------------------------------------------------------|----------------|-----------|-------------------|---------------------------------------------------------------------------------------------------------------------------------------------------------------------------------------------------------------------------------------------------------------------------------------------------------------------------------------------------------------------------------------------------------------------------------------------------------------------------------------------------------------------------------------------------------------------------------------------------------------------------------------------------------------------------------------------------------------------------------------------------------------------------------------------------------------------------------------------------------------------------------------------------------------------------------------------------------------------------------------------------------------------------------------------------------------------------------------------------------|
|                                                                                           |                |           |                   | 5739; 5793; 6261; 25956;<br>5413; 8631; 9806; 6756;<br>7299                                                                                                                                                                                                                                                                                                                                                                                                                                                                                                                                                                                                                                                                                                                                                                                                                                                                                                                                                                                                                                             |
| <b>Cytolytic.Activity<br/>Rooney Cell.2015<br/>PMID.25594174</b>                          | <b>T cells</b> | Signature | PMID.25<br>594174 | 3001; 5551                                                                                                                                                                                                                                                                                                                                                                                                                                                                                                                                                                                                                                                                                                                                                                                                                                                                                                                                                                                                                                                                                              |
| <b>Cytotoxic.Lymphocy<br/>tes.MCP Petitprez<br/>Nature.2020<br/>PMID.31942077</b>         | <b>T cells</b> | Signature | PMID.31<br>942077 | 925; 8320; 83888; 10578;<br>3823; 8302; 3824                                                                                                                                                                                                                                                                                                                                                                                                                                                                                                                                                                                                                                                                                                                                                                                                                                                                                                                                                                                                                                                            |
| <b>Immune.Active<br/>Hollern Cell.2019<br/>PMID.31730857</b>                              | <b>T cells</b> | Signature | PMID.31<br>730857 | 12; 356; 433; 640; 718;<br>914; 915; 916; 917; 920;<br>923; 924; 925; 927; 930;<br>931; 933; 939; 940; 959;<br>969; 972; 973; 1233; 1380;<br>1493; 1776; 2634; 2841;<br>2864; 3002; 3109; 3111;<br>3112; 3117; 3120; 3135;<br>3274; 3363; 3458; 3495;<br>3500; 3502; 3512; 3514;<br>3559; 3560; 3581; 3593;<br>3595; 3627; 3682; 3702;<br>3816; 3820; 3824; 4049;<br>4050; 4261; 4283; 4332;<br>4818; 5079; 5133; 5551;<br>5790; 6039; 6346; 6352;<br>6363; 6367; 6373; 6434;<br>6504; 6518; 6773; 6846;<br>6909; 8302; 8530; 8740;<br>8798; 8942; 9402; 9476;<br>9934; 10019; 10100;<br>10225; 10420; 10563;<br>10612; 10663; 10666;<br>10803; 22806; 22914;<br>26191; 26279; 27334;<br>28557; 28558; 28621;<br>28683; 28776; 29126;<br>29851; 29909; 51617;<br>53347; 54929; 56253;<br>56949; 57823; 64386;<br>80380; 84327; 84636;<br>114132; 114770; 114836;<br>115350; 115362; 117157;<br>137970; 152789; 158067;<br>163351; 168537; 202309;<br>221150; 221830; 246778;<br>283420; 284486; 345611;<br>353345; 387914; 387923;<br>388507; 388646; 400410;<br>445347; 100423062;<br>100527949; 84824 |
| <b>CTLA4.Pathway<br/>GSEA.BIOCARTA<br/>ProcNatlAcadSciUS<br/>A.2005<br/>PMID.16199517</b> | <b>T cells</b> | Signature | PMID.16<br>199517 | 5781; 941; 942; 940; 915;<br>916; 917; 3702; 5290;<br>23308; 6957; 6955; 2885;<br>919; 29851; 5295; 3932;<br>3123; 3122; 1493; 3558                                                                                                                                                                                                                                                                                                                                                                                                                                                                                                                                                                                                                                                                                                                                                                                                                                                                                                                                                                     |

|                                                                                                                                  |                       |                  |                           |                                                                                                                                                                                                                                                                                                                                                                                                                                                                                                                                                                                                              |
|----------------------------------------------------------------------------------------------------------------------------------|-----------------------|------------------|---------------------------|--------------------------------------------------------------------------------------------------------------------------------------------------------------------------------------------------------------------------------------------------------------------------------------------------------------------------------------------------------------------------------------------------------------------------------------------------------------------------------------------------------------------------------------------------------------------------------------------------------------|
| <p><b>Immune.cell.Cluster.<br/>PerouLab<br/>Fan.GSEA.GP2<br/>BMC MedGenomics.2<br/>011 PMID.21214954</b></p>                     | <p><b>T cells</b></p> | <p>Signature</p> | <p>PMID.16<br/>199517</p> | <p>7453; 3620; 6039; 8477;<br/>4332; 27074; 25816; 4067;<br/>7128; 51316; 3575; 1439;<br/>3659; 7133; 27299; 56833;<br/>55423; 4050; 5790; 1236;<br/>9806; 5341; 972; 3108;<br/>3122; 3109; 2207; 7305;<br/>7805; 3689; 712; 6772;<br/>6373; 3627; 2633; 6890;<br/>5698; 55303; 5552; 10875;<br/>3059; 9938; 3932; 2124;<br/>55843; 9595; 3001; 3937;<br/>963; 3587; 962; 6352; 915;<br/>914; 3003; 5788; 4283;<br/>9535; 3394; 1520; 22797;<br/>6503; 9056; 7940; 199;<br/>942; 3071; 9473; 4069;<br/>1043; 6402; 3134; 3106;<br/>3133; 3002; 10507; 11118;<br/>10384; 834</p>                              |
| <p><b>Tcells.Bcell.KEGG.h<br/>ematopoietic.cell.line<br/>age GSEA.GP2<br/>ProcNatlAcadSciUS<br/>A.2005<br/>PMID.16199517</b></p> | <p><b>T cells</b></p> | <p>Signature</p> | <p>PMID.16<br/>199517</p> | <p>2811; 2812; 2056; 3581;<br/>945; 7124; 2815; 3684;<br/>947; 948; 2814; 3676;<br/>3675; 4254; 3674; 2209;<br/>3678; 2208; 2993; 7066;<br/>7850; 3575; 4311; 3590;<br/>930; 931; 7037; 933; 3815;<br/>2322; 3690; 2323; 3552;<br/>1380; 929; 1378; 7173;<br/>2057; 3589; 1437; 3126;<br/>920; 1436; 3127; 1435;<br/>3125; 3563; 3562; 966;<br/>652799; 928; 925; 926;<br/>960; 924; 921; 1438; 1604;<br/>1791; 1440; 3553; 3554;<br/>3559; 3655; 3570; 3673;<br/>3672; 1441; 3574; 951;<br/>914; 915; 916; 952; 917;<br/>910; 290; 911; 912; 913;<br/>909; 3565; 3566; 3567;<br/>3568; 3569; 3123; 3122</p> |
| <p><b>PD1.Signaling.React<br/>ome GSEA<br/>ProcNatlAcadSciUS<br/>A.2005<br/>PMID.16199517</b></p>                                | <p><b>T cells</b></p> | <p>Signature</p> | <p>PMID.16<br/>199517</p> | <p>1445; 29126; 3113; 3115;<br/>3117; 3118; 3123; 3125;<br/>3127; 3932; 5133; 5777;<br/>80380; 915; 916; 917; 919;<br/>920</p>                                                                                                                                                                                                                                                                                                                                                                                                                                                                               |
| <p><b>Tcells.CD8 Bindea<br/>Immunity.2013<br/>PMID.24138885</b></p>                                                              | <p><b>T cells</b></p> | <p>Signature</p> | <p>PMID.24<br/>138885</p> | <p>166; 321; 678; 687; 819;<br/>925; 926; 1647; 1831;<br/>2323; 3004; 3337; 5196;<br/>5504; 5551; 5935; 6432;<br/>6844; 6903; 6935; 7536;<br/>7570; 7644; 7994; 9194;<br/>11322; 23060; 23484;<br/>29777; 51275; 54923;<br/>55602; 55615; 55623;<br/>79441; 91304</p>                                                                                                                                                                                                                                                                                                                                        |

|                                                                                 |                |           |                   |                                                                                                                                                                                                                                    |
|---------------------------------------------------------------------------------|----------------|-----------|-------------------|------------------------------------------------------------------------------------------------------------------------------------------------------------------------------------------------------------------------------------|
| <b>Cytotoxic.cells<br/>Bindea<br/>Immunity.2013<br/>PMID.24138885</b>           | <b>T cells</b> | Signature | PMID.24<br>138885 | 321; 864; 1521; 1844;<br>2999; 3001; 3820; 3824;<br>4818; 6095; 7704; 10578;<br>22914; 51348; 59307;<br>80833; 339005                                                                                                              |
| <b>Tcells Bindea<br/>Immunity.2013<br/>PMID.24138885</b>                        | <b>T cells</b> | Signature | PMID.24<br>138885 | 914; 915; 916; 917; 923;<br>940; 3932; 4068; 5588;<br>6955; 8631; 9452; 10225;<br>28639; 28755; 50852;<br>55340; 64919; 83988                                                                                                      |
| <b>Tcells.Thelper<br/>Bindea<br/>Immunity.2013<br/>PMID.24138885</b>            | <b>T cells</b> | Signature | PMID.24<br>138885 | 940; 987; 1386; 4676;<br>5527; 6117; 6955; 7332;<br>8604; 9452; 9632; 10538;<br>10541; 10730; 10772;<br>23015; 25842; 29851;<br>55274; 57122; 63901;<br>79009; 79866; 285527                                                       |
| <b>Tcells.Follicular.Help<br/>er Bindea<br/>Immunity.2013<br/>PMID.24138885</b> | <b>T cells</b> | Signature | PMID.24<br>138885 | 643; 753; 1114; 1117;<br>3382; 4086; 4094; 5783;<br>6489; 7253; 8362; 8645;<br>8851; 9760; 10563; 10585;<br>23178; 23462; 27087;<br>27347; 54436; 55423;<br>56301; 57496; 57535;<br>63892; 92595; 28986;<br>4646; 4647; 5133; 5816 |
| <b>Tcells.Gamma.Delta<br/>Bindea<br/>Immunity.2013<br/>PMID.24138885</b>        | <b>T cells</b> | Signature | PMID.24<br>138885 | 6964; 6983; 9638; 10485;<br>11126; 445347                                                                                                                                                                                          |
| <b>Tcells.Th1.cells<br/>Bindea<br/>Immunity.2013<br/>PMID.24138885</b>          | <b>T cells</b> | Signature | PMID.24<br>138885 | 323; 347; 684; 952; 970;<br>1437; 1493; 1803; 1839;<br>1847; 2678; 3458; 3595;<br>4049; 6351; 6443; 7804;<br>8418; 9143; 9162; 10079;<br>10950; 25975; 27033;<br>50616; 54674; 55816                                               |
| <b>Tcells.Th17.cells<br/>Bindea<br/>Immunity.2013<br/>PMID.24138885</b>         | <b>T cells</b> | Signature | PMID.24<br>138885 | 3605; 6097; 23765                                                                                                                                                                                                                  |
| <b>Tcells.Th2.cells<br/>Bindea<br/>Immunity.2013<br/>PMID.24138885</b>          | <b>T cells</b> | Signature | PMID.24<br>138885 | 107; 286; 332; 995; 1063;<br>1719; 2625; 2941; 3070;<br>3904; 4087; 4151; 5251;<br>5367; 5740; 6632; 7813;<br>8317; 9645; 10663; 11169;<br>23516; 51474; 54806;<br>55247; 55801; 728210                                            |
| <b>Immune.Hot.vs.Cold.<br/>CD8 Cabrita<br/>Nature.2020<br/>PMID.31942071</b>    | <b>T cells</b> | Signature | PMID.31<br>942071 | 4069; 5552; 962; 51316;<br>1075; 9595; 939; 3123;<br>3394; 2533; 2124; 5880;<br>6352; 3122; 3119; 11151;<br>3512; 91353; 951; 3575;<br>6039; 4283; 3117; 27299;<br>963; 7805; 2207; 7852;                                          |



|  |  |  |  |                                                                                                                                                                                                                                                                                                                                                                                                                                                                                                                                                                                                                                                                                                                                                                                                                                                                                                                                                                                                                                                                                                                                                                                                                                                                                                                                                                                                                                                                                                                                                    |
|--|--|--|--|----------------------------------------------------------------------------------------------------------------------------------------------------------------------------------------------------------------------------------------------------------------------------------------------------------------------------------------------------------------------------------------------------------------------------------------------------------------------------------------------------------------------------------------------------------------------------------------------------------------------------------------------------------------------------------------------------------------------------------------------------------------------------------------------------------------------------------------------------------------------------------------------------------------------------------------------------------------------------------------------------------------------------------------------------------------------------------------------------------------------------------------------------------------------------------------------------------------------------------------------------------------------------------------------------------------------------------------------------------------------------------------------------------------------------------------------------------------------------------------------------------------------------------------------------|
|  |  |  |  | 3689; 3059; 2123; 1520;<br>5341; 64092; 6355; 713;<br>3587; 51816; 7351; 3115;<br>10875; 712; 2745; 51338;<br>241; 11040; 3001; 3003;<br>915; 3669; 9938; 969;<br>1043; 914; 3702; 6402;<br>11184; 1236; 27074; 1880;<br>9214; 26191; 50856; 4818;<br>64919; 6363; 9535; 3071;<br>3683; 2313; 925; 5551;<br>60489; 474344; 942; 8477;<br>9262; 10288; 91543; 6890;<br>3135; 3620; 5698; 3134;<br>3133; 3106; 9246; 6772;<br>3429; 5996; 8519; 5696;<br>3437; 10125; 9636; 6891;<br>4599; 10964; 55601; 4939;<br>3600; 54739; 2537; 3659;<br>3458; 1776; 7412; 4050;<br>3002; 973; 972; 10563;<br>4067; 330; 25816; 5734;<br>729230; 6387; 51237;<br>3113; 64231; 4689; 7133;<br>6362; 3109; 10437; 56833;<br>3128; 4688; 6348; 7941;<br>9332; 6648; 7453; 3126;<br>8942; 7128; 7305; 3108;<br>1436; 629; 240; 3936;<br>1512; 1536; 5265; 54440;<br>3055; 2219; 1675; 30835;<br>54855; 952; 1794; 4033;<br>5579; 80342; 3957; 7940;<br>199; 11262; 695; 55340;<br>716; 730; 1438; 919; 917;<br>4068; 10225; 29851; 3112;<br>3820; 3695; 26051; 120;<br>924; 6366; 8875; 5790;<br>834; 971; 4066; 11025;<br>10791; 55303; 23228;<br>6414; 81030; 50619;<br>387751; 54923; 3627;<br>9235; 6373; 10578; 9404;<br>2209; 9056; 7462; 6775;<br>11006; 9447; 2359; 2833;<br>2999; 8685; 6357; 5721;<br>10346; 5920; 80833;<br>10261; 51056; 79961;<br>54518; 83593; 80709;<br>5777; 714; 6001; 10870;<br>58475; 51296; 257106;<br>5294; 26157; 10320;<br>219285; 64098; 441168;<br>115362; 256236; 259307;<br>30061; 10507; 81704;<br>353514; 7318; 10068; |
|--|--|--|--|----------------------------------------------------------------------------------------------------------------------------------------------------------------------------------------------------------------------------------------------------------------------------------------------------------------------------------------------------------------------------------------------------------------------------------------------------------------------------------------------------------------------------------------------------------------------------------------------------------------------------------------------------------------------------------------------------------------------------------------------------------------------------------------------------------------------------------------------------------------------------------------------------------------------------------------------------------------------------------------------------------------------------------------------------------------------------------------------------------------------------------------------------------------------------------------------------------------------------------------------------------------------------------------------------------------------------------------------------------------------------------------------------------------------------------------------------------------------------------------------------------------------------------------------------|

|                                                               |                       |                  |                           |                                                                                                                                                                                                                                                                                                                                                                                                                                                                                                                                                                                                                                                                                                                                                                                                                                                                                                                                                                                                             |
|---------------------------------------------------------------|-----------------------|------------------|---------------------------|-------------------------------------------------------------------------------------------------------------------------------------------------------------------------------------------------------------------------------------------------------------------------------------------------------------------------------------------------------------------------------------------------------------------------------------------------------------------------------------------------------------------------------------------------------------------------------------------------------------------------------------------------------------------------------------------------------------------------------------------------------------------------------------------------------------------------------------------------------------------------------------------------------------------------------------------------------------------------------------------------------------|
|                                                               |                       |                  |                           | <p>3433; 255231; 9619; 3635;<br/> 9450; 27071; 57823;<br/> 118788; 84433; 5336;<br/> 7454; 114836; 10537;<br/> 4938; 10148; 64407; 8638;<br/> 2643; 94240; 10538;<br/> 51225; 51284; 4973;<br/> 27128; 113791; 53829;<br/> 6688; 84803; 203328;<br/> 11309; 374403; 5583;<br/> 92241; 54900; 11320;<br/> 100131187; 286530;<br/> 64135; 3430; 3665; 717;<br/> 9476; 3107; 3125; 3120;<br/> 2210; 3824; 3902; 28874;<br/> 28896; 3111; 3904; 3805;<br/> 146722; 89790; 10990;<br/> 26270; 8743; 83666;<br/> 168537; 217; 3560; 2268;<br/> 149628; 51311; 2517;<br/> 54502; 7538; 64005;<br/> 128346; 3136; 115361;<br/> 414062; 64926; 8676;<br/> 79895; 160364; 3543;<br/> 4242; 56990; 10170;<br/> 170575; 10866; 27334;<br/> 2203; 114614; 160365;<br/> 89846; 118932; 51703;<br/> 154; 202309; 57552;<br/> 155038; 55840; 9050;<br/> 221472; 9560; 1318; 1050;<br/> 9806; 147463; 126306;<br/> 84969; 51755; 654817;<br/> 10800; 260436; 115352;<br/> 57172; 430; 376412;<br/> 387841; 400759; 79037</p> |
| <p><b>Immune.87 Perez<br/> JCO.2015<br/> PMID.2560586</b></p> | <p><b>T cells</b></p> | <p>Signature</p> | <p>PMID.25<br/> 60586</p> | <p>3635; 729230; 3575; 3133;<br/> 3689; 3487; 7454; 10870;<br/> 3071; 7494; 81793; 6352;<br/> 7133; 3385; 3821; 4049;<br/> 3458; 4050; 959; 3394;<br/> 7412; 5729; 5734; 941;<br/> 4068; 54106; 973; 2833;<br/> 313; 695; 9934; 120425;<br/> 1235; 4069; 4065; 7852;<br/> 3683; 915; 5788; 976;<br/> 3561; 3766; 3932; 913;<br/> 2534; 11126; 6693; 5336;<br/> 3115; 3823; 9437; 3620;<br/> 916; 26191; 3112; 1233;<br/> 2826; 919; 10563; 84174;<br/> 3001; 718; 5168; 6932;<br/> 917; 6387; 10225; 54900;<br/> 974; 29126; 952; 5551;<br/> 1493; 84632; 5588; 80833;<br/> 1236; 29851; 6402; 10219;</p>                                                                                                                                                                                                                                                                                                                                                                                                   |

|                                                                                    |                |           |                   |                                                                                                                                                                                                                                                                                                                                                                                                           |
|------------------------------------------------------------------------------------|----------------|-----------|-------------------|-----------------------------------------------------------------------------------------------------------------------------------------------------------------------------------------------------------------------------------------------------------------------------------------------------------------------------------------------------------------------------------------------------------|
|                                                                                    |                |           |                   | 3543; 3702; 925; 115650;<br>6366; 6403; 6363                                                                                                                                                                                                                                                                                                                                                              |
| <b>LCK Rody<br/>BreastCancerResear<br/>ch.2008<br/>PMID.19272155</b>               | <b>T cells</b> | Signature | PMID.19<br>272155 | 55843; 22914; 54440;<br>9938; 6504; 55340; 4068;<br>1236; 3702; 28568; 5880;<br>11151; 5293; 9404; 5579;<br>6775; 9535; 6404; 10875;<br>2124; 1439; 3003; 64092;<br>55303; 3394; 3071; 3587;<br>28755; 3635; 51316; 6352;<br>919; 4050; 3561; 3059;<br>3575; 963; 1231; 3932;<br>915; 939; 3001; 6402;<br>28566; 914; 962; 6503;<br>3937; 5552; 5788                                                      |
| <b>MCD3.CD8 Fan<br/>BMC MedGenomics.2<br/>011 PMID.21214954</b>                    | <b>T cells</b> | Signature | PMID.21<br>214954 | 3932; 390243; 151888;<br>5450; 4242; 115350;<br>84824; 9214; 51617; 1840;<br>940; 26999; 4068; 3111;<br>921; 9840; 27040; 89857;<br>2833; 4050; 84329; 6689;<br>1380; 30009; 10750;<br>10870; 3603; 643; 974;<br>51237; 931; 55843; 26228;<br>923; 8631; 926; 915; 914;<br>3702; 925; 917; 6402; 399;<br>3695; 3560; 1731; 27334;<br>939; 6775; 80342; 26279;<br>393; 26191; 9476; 1269;<br>168537; 84433 |
| <b>MERCK.Immune.Sig<br/>nature Cristescu<br/>Science.2018<br/>PMID.30309915</b>    | <b>T cells</b> | Signature | PMID.30<br>309915 | 6352; 939; 29126; 80381;<br>925; 1240; 4283; 10663;<br>3117; 3123; 3133; 3620;<br>3902; 4818; 80380; 5699;<br>6772; 201633                                                                                                                                                                                                                                                                                |
| <b>Tcells.NK.Metagene<br/>Miller<br/>GenomeBiol.2013<br/>PMID.23618380</b>         | <b>T cells</b> | Signature | PMID.23<br>618380 | 4242; 10875; 3587; 916;<br>5579; 2841; 2124; 1521;<br>3820; 6375; 3059; 3635;<br>5293; 962; 951; 6402;<br>3932; 54440; 1439; 939;<br>3003; 729230; 11151;<br>3603; 28517; 3702; 10730;<br>5788; 5880; 4818; 55340;<br>55843; 474344; 9938                                                                                                                                                                 |
| <b>Tcells.ImmuneProfile<br/>s.Mouse.Human<br/>Shay PNAS.2013<br/>PMID.23382184</b> | <b>T cells</b> | Signature | PMID.23<br>382184 | 23; 120; 158; 166; 360;<br>399; 406; 472; 476; 596;<br>814; 841; 894; 914; 915;<br>916; 917; 919; 921; 923;<br>939; 940; 944; 955; 1107;<br>1236; 1455; 1477; 1493;<br>1540; 1606; 1643; 1778;<br>1936; 2071; 2073; 2113;<br>2145; 2308; 2534; 2580;<br>2617; 2625; 3097; 3268;<br>3337; 3384; 3396; 3561;<br>3572; 3575; 3603; 3655;                                                                     |

|  |  |  |  |                                                                                                                                                                                                                                                                                                                                                                                                                                                                                                                                                                                                                                                                                                                                                                                                                                                                                                                                                                                                                                                                                                                                                                                                                                                                                                                                                                                                                                                               |
|--|--|--|--|---------------------------------------------------------------------------------------------------------------------------------------------------------------------------------------------------------------------------------------------------------------------------------------------------------------------------------------------------------------------------------------------------------------------------------------------------------------------------------------------------------------------------------------------------------------------------------------------------------------------------------------------------------------------------------------------------------------------------------------------------------------------------------------------------------------------------------------------------------------------------------------------------------------------------------------------------------------------------------------------------------------------------------------------------------------------------------------------------------------------------------------------------------------------------------------------------------------------------------------------------------------------------------------------------------------------------------------------------------------------------------------------------------------------------------------------------------------|
|  |  |  |  | 3661; 3695; 3702; 3707;<br>3738; 3932; 3985; 4063;<br>4068; 4216; 4242; 4552;<br>4676; 4775; 4798; 4839;<br>4891; 4926; 5001; 5140;<br>5144; 5293; 5297; 5335;<br>5527; 5528; 5578; 5583;<br>5588; 5727; 5965; 6095;<br>6117; 6197; 6232; 6301;<br>6304; 6415; 6448; 6489;<br>6504; 6609; 6709; 6772;<br>6777; 6829; 6932; 7049;<br>7174; 7277; 7294; 7433;<br>7535; 7597; 7841; 8216;<br>8445; 8449; 8480; 8514;<br>8525; 8631; 8651; 8718;<br>8720; 8821; 8871; 8888;<br>8890; 8893; 8906; 9047;<br>9057; 9267; 9368; 9402;<br>9452; 9730; 9903; 9913;<br>9919; 9923; 10048; 10123;<br>10125; 10225; 10235;<br>10291; 10531; 10641;<br>10666; 10671; 10723;<br>10767; 10801; 10868;<br>10947; 10985; 11059;<br>11123; 11322; 11329;<br>11336; 22859; 22887;<br>22890; 22993; 23033;<br>23046; 23214; 23215;<br>23248; 23338; 23344;<br>23348; 23352; 23368;<br>23370; 23381; 23484;<br>23492; 23523; 23526;<br>23774; 24148; 25777;<br>25948; 25996; 26009;<br>26018; 26119; 26207;<br>26249; 27040; 27240;<br>27347; 28951; 28984;<br>29851; 29980; 50852;<br>51070; 51174; 51176;<br>51185; 51367; 51466;<br>51531; 51586; 51654;<br>51669; 51696; 51735;<br>51761; 53347; 54093;<br>54509; 54541; 54606;<br>54870; 54941; 55037;<br>55049; 55080; 55102;<br>55127; 55253; 55275;<br>55303; 55324; 55623;<br>55667; 55695; 55703;<br>55795; 56829; 56948;<br>56965; 57062; 57185;<br>57194; 57198; 59307;<br>60487; 63892; 64132;<br>64210; 64425; 64601; |
|--|--|--|--|---------------------------------------------------------------------------------------------------------------------------------------------------------------------------------------------------------------------------------------------------------------------------------------------------------------------------------------------------------------------------------------------------------------------------------------------------------------------------------------------------------------------------------------------------------------------------------------------------------------------------------------------------------------------------------------------------------------------------------------------------------------------------------------------------------------------------------------------------------------------------------------------------------------------------------------------------------------------------------------------------------------------------------------------------------------------------------------------------------------------------------------------------------------------------------------------------------------------------------------------------------------------------------------------------------------------------------------------------------------------------------------------------------------------------------------------------------------|

|                                                                          |                |           |                |                                                                                                                                                                                                                                                                                                                                                                                                          |
|--------------------------------------------------------------------------|----------------|-----------|----------------|----------------------------------------------------------------------------------------------------------------------------------------------------------------------------------------------------------------------------------------------------------------------------------------------------------------------------------------------------------------------------------------------------------|
|                                                                          |                |           |                | 64745; 64750; 64784; 64919; 65083; 65983; 79573; 79595; 79695; 79726; 79913; 79918; 79961; 79991; 80007; 80152; 80198; 80335; 80342; 80762; 81606; 84162; 84859; 89941; 93210; 113791; 117246; 120526; 399665; 474344; 1039; 23020; 50649; 55718; 55843; 6687; 7067; 7267; 9138; 926; 9906; 101060399; 101929240; 101930241; 101060521; 101928361; 101930112; 9572; 286495; 100505585; 100996919; 728661 |
| <b>Tcells.CD4.Activated Charoentong CellRep.2017 PMID.28052254</b>       | <b>T cells</b> | Signature | PMID.28 052254 | 83990; 9447; 330; 6364; 6351; 6352; 891; 1236; 1844; 157570; 2113; 9156; 54536; 3376; 3702; 3832; 9735; 83540; 9055; 29968; 5996; 219790; 64092; 6402; 50852                                                                                                                                                                                                                                             |
| <b>Tcells.CD8.Activated Charoentong CellRep.2017 PMID.28052254</b>       | <b>T cells</b> | Signature | PMID.28 052254 | 917; 11047; 10598; 29071; 10693; 951; 915; 916; 969; 925; 1070; 1434; 79833; 10578; 84706; 3001; 2999; 3003; 3560; 3932; 9019; 4818; 113791; 51651; 26517; 7535                                                                                                                                                                                                                                          |
| <b>Tcells.CD4.Central.Memory Charoentong CellRep.2017 PMID.28052254</b>  | <b>T cells</b> | Signature | PMID.28 052254 | 2937; 171586; 79026; 304; 360; 80162; 648; 28969; 967; 1282; 1540; 63916; 2534; 11010; 10581; 3688; 3689; 688; 4046; 4715; 5315; 81855; 55423; 4089; 6810; 8717; 7431; 2547                                                                                                                                                                                                                              |
| <b>Tcells.CD8.Central.Memory Charoentong CellRep.2017 PMID.28052254</b>  | <b>T cells</b> | Signature | PMID.28 052254 | 2288; 81; 8038; 115; 2162; 2207; 2215; 2252; 2746; 2760; 2990; 3557; 25926; 4914; 5914; 79589; 6614; 8792; 9878; 7311; 80329                                                                                                                                                                                                                                                                             |
| <b>Tcells.CD4.Effector.Memory Charoentong CellRep.2017 PMID.28052254</b> | <b>T cells</b> | Signature | PMID.28 052254 | 7857; 472; 836; 844; 342510; 1615; 23348; 5393; 2146; 51573; 146433; 8031; 4747; 5157; 5742; 85021; 8436; 100049587; 946; 6886; 22797; 54962; 27010; 7381; 8287; 7456; 85437                                                                                                                                                                                                                             |
| <b>Tcells.CD8.Effector.Memory Charoentong</b>                            | <b>T cells</b> | Signature | PMID.28 052254 | 80833; 79658; 9744; 57205; 719; 1234; 11126; 1604; 8837; 1240; 27071; 343413; 2323; 3004;                                                                                                                                                                                                                                                                                                                |

|                                                                                     |                |           |                   |                                                                                                                                                                                                                                                                                                                                                                                                                                                                                                                                                               |
|-------------------------------------------------------------------------------------|----------------|-----------|-------------------|---------------------------------------------------------------------------------------------------------------------------------------------------------------------------------------------------------------------------------------------------------------------------------------------------------------------------------------------------------------------------------------------------------------------------------------------------------------------------------------------------------------------------------------------------------------|
| <b>CellRep.2017<br/>PMID.28052254</b>                                               |                |           |                   | 145864; 3109; 3113; 3115;<br>3428; 54923; 4058; 4792;<br>80854; 150094; 28951                                                                                                                                                                                                                                                                                                                                                                                                                                                                                 |
| <b>Tcells.Gamma.Delta<br/>Charoentong<br/>CellRep.2017<br/>PMID.28052254</b>        | <b>T cells</b> | Signature | PMID.28<br>052254 | 2171; 54; 366; 11118;<br>79630; 22900; 6357; 6362;<br>30835; 945; 948; 1020;<br>28988; 2168; 8772; 3588;<br>55975; 51348; 144501;<br>3915; 254251; 3956; 4001;<br>5598; 4213; 9848; 9562;<br>4352; 6229; 6201; 6203                                                                                                                                                                                                                                                                                                                                           |
| <b>Tcells.Regulatory<br/>Charoentong<br/>CellRep.2017<br/>PMID.28052254</b>         | <b>T cells</b> | Signature | PMID.28<br>052254 | 3988; 4035; 6349; 971;<br>23601; 50943; 3676; 3897;<br>115353; 8685; 4321; 4332;<br>4360; 64231; 53918; 5341;<br>11098; 5739; 7903; 23166                                                                                                                                                                                                                                                                                                                                                                                                                     |
| <b>Tcells.Follicular.Help<br/>er Charoentong<br/>CellRep.2017<br/>PMID.28052254</b> | <b>T cells</b> | Signature | PMID.28<br>052254 | 2247; 8829; 8480; 27087;<br>604; 4345; 9308; 8832;<br>8851; 1050; 51816; 55501;<br>10462; 50856; 9022; 1436;<br>1520; 23336; 1803; 2841;<br>10625; 3803; 5641; 2615;<br>4161; 100507436; 4684;<br>9436; 5133; 80380; 10016;<br>5052; 135250; 27036;<br>27180; 7301                                                                                                                                                                                                                                                                                            |
| <b>Tcells.Th1.cells<br/>Charoentong<br/>CellRep.2017<br/>PMID.28052254</b>          | <b>T cells</b> | Signature | PMID.28<br>052254 | 1600; 84085; 3357; 6403;<br>27240; 101; 23382; 214;<br>8706; 166379; 683; 800;<br>977; 961; 962; 1043; 963;<br>966; 923; 968; 924; 970;<br>10225; 976; 10878; 1131;<br>64581; 91522; 1286;<br>50509; 220107; 8447;<br>11072; 2012; 8507; 2161;<br>54463; 9103; 5045;<br>139716; 2628; 9945; 2848;<br>64388; 26762; 3290;<br>30811; 3385; 3481; 3592;<br>3659; 3691; 4056; 11253;<br>4190; 284207; 23531;<br>55034; 5026; 92241; 6004;<br>6261; 60485; 6401; 30011;<br>89790; 8631; 51000; 6769;<br>30009; 80745; 201633;<br>51311; 7132; 7185; 10758;<br>9839 |
| <b>Tcells.Th17.cells<br/>Charoentong<br/>CellRep.2017<br/>PMID.28052254</b>         | <b>T cells</b> | Signature | PMID.28<br>052254 | 10803; 1084; 19; 5243;<br>81792; 286; 118932; 8707;<br>145741; 388125; 760;<br>23261; 85478; 958; 11251;<br>57560; 3605; 27189;<br>112744; 23765; 84818;<br>132014; 51561; 286676;<br>79836; 284948; 79155                                                                                                                                                                                                                                                                                                                                                    |

|                                                                                             |                       |                  |                           |                                                                                                                                                                                                                                                                                                                                                                                                                                                                                                                                                                                                                                                        |
|---------------------------------------------------------------------------------------------|-----------------------|------------------|---------------------------|--------------------------------------------------------------------------------------------------------------------------------------------------------------------------------------------------------------------------------------------------------------------------------------------------------------------------------------------------------------------------------------------------------------------------------------------------------------------------------------------------------------------------------------------------------------------------------------------------------------------------------------------------------|
| <p><b>Tcells.Th2<br/>Charoentong<br/>CellRep.2017<br/>PMID.28052254</b></p>                 | <p><b>T cells</b></p> | <p>Signature</p> | <p>PMID.28<br/>052254</p> | <p>10395; 8828; 64699;<br/>51676; 332; 995; 8317;<br/>1063; 1466; 10663; 1612;<br/>1719; 56521; 1848; 7813;<br/>2625; 2770; 2941; 3070;<br/>55801; 3904; 27074;<br/>114876; 5142; 22822;<br/>5321; 5874; 27303; 54941</p>                                                                                                                                                                                                                                                                                                                                                                                                                              |
| <p><b>Tcells ImSig.Nirmal<br/>CancerImmunoIRes.<br/>2018 PMID.30266715</b></p>              | <p><b>T cells</b></p> | <p>Signature</p> | <p>PMID.30<br/>266715</p> | <p>9595; 3603; 925; 9450;<br/>6967; 1043; 79037; 84329;<br/>55843; 128346; 695; 6503;<br/>962; 10225; 4068; 197358;<br/>89857; 2313; 28755; 2123;<br/>139716; 10663; 2124;<br/>55619; 64174; 399; 64333;<br/>3820; 64098; 56253; 917;<br/>915; 916; 2841; 29909;<br/>6983; 5583; 50852; 11262;<br/>9938; 10870; 3604; 3003;<br/>1236; 55423; 445347;<br/>51411; 3936; 3683; 4283;<br/>654816; 5790; 3575;<br/>54518; 1794; 51561; 3587;<br/>29851; 9051; 914; 53347;<br/>923; 939; 92241; 940;<br/>2533; 26157; 3702; 55303;<br/>374403; 55340; 474344;<br/>168537; 6363; 64407;<br/>81704; 83593; 11151;<br/>2534; 9535; 80342; 54440;<br/>441168</p> |
| <p><b>Tcells.NK.51genes<br/>Miller<br/>GenomeBiol.2013<br/>PMID.23618380</b></p>            | <p><b>T cells</b></p> | <p>Signature</p> | <p>PMID.23<br/>618380</p> | <p>55843; 9938; 729230;<br/>1236; 919; 939; 951; 915;<br/>916; 962; 11151; 1439;<br/>1521; 2124; 10875; 2533;<br/>55340; 474344; 9535;<br/>2841; 3001; 3003; 3059;<br/>3133; 3587; 3603; 51561;<br/>3635; 3702; 3820; 3932;<br/>9404; 4050; 4242; 4818;<br/>5293; 5579; 5788; 5790;<br/>79037; 5880; 54440; 6402;<br/>4068; 7128; 6846; 10730;<br/>57175; 6375; 100527949;<br/>10734</p>                                                                                                                                                                                                                                                               |
| <p><b>Tcells.CD8.Effector.v<br/>s.Naive.2 Pauken<br/>Science.2016<br/>PMID.27789795</b></p> | <p><b>T cells</b></p> | <p>Signature</p> | <p>PMID.27<br/>789795</p> | <p>54443; 378708; 9824;<br/>84986; 55723; 259266;<br/>79915; 6790; 9212; 332;<br/>672; 83990; 699; 701;<br/>57082; 836; 890; 891;<br/>9133; 899; 991; 995; 990;<br/>157313; 83461; 113130;<br/>55143; 1033; 1058; 1062;<br/>1063; 64946; 64105;<br/>55839; 401541; 55165;<br/>1111; 26586; 150468;</p>                                                                                                                                                                                                                                                                                                                                                 |

|                                                                                     |                       |                  |                      |                                                                                                                                                                                                                                                                                                                                                                                                                                                                                                                                                                                                                                                                                                                          |
|-------------------------------------------------------------------------------------|-----------------------|------------------|----------------------|--------------------------------------------------------------------------------------------------------------------------------------------------------------------------------------------------------------------------------------------------------------------------------------------------------------------------------------------------------------------------------------------------------------------------------------------------------------------------------------------------------------------------------------------------------------------------------------------------------------------------------------------------------------------------------------------------------------------------|
|                                                                                     |                       |                  |                      | <p>1163; 1164; 63967; 55635; 1719; 81624; 9787; 79075; 51514; 79733; 1894; 157570; 9700; 9156; 2146; 2171; 26271; 2237; 63979; 2305; 9837; 3014; 3070; 3161; 3619; 9768; 57650; 3832; 56992; 146909; 10112; 3835; 9493; 11004; 24137; 9735; 3838; 3978; 4001; 4085; 55388; 4172; 4174; 4176; 9833; 4288; 4603; 9918; 64151; 54892; 23397; 10403; 55247; 4751; 83540; 51203; 55872; 5347; 10733; 5422; 5426; 9055; 5557; 55771; 22949; 29127; 5888; 10635; 8438; 5932; 5983; 6240; 6241; 151648; 79801; 29015; 10592; 10615; 147841; 57405; 6491; 3925; 256126; 10460; 6941; 7153; 22974; 9319; 7272; 7298; 11065; 29128; 7468; 55055</p>                                                                                 |
| <p><b>Tcells.CD8.Exhausted vs. AntiPDL1.2 Pauken Science.2016 PMID.27789795</b></p> | <p><b>T cells</b></p> | <p>Signature</p> | <p>PMID.27789795</p> | <p>132; 79026; 50808; 302; 302; 307; 259266; 332; 699; 701; 11238; 837; 890; 891; 899; 729230; 1234; 1235; 968; 941; 991; 994; 995; 990; 983; 1062; 55165; 1111; 11113; 26586; 1163; 1164; 1240; 1397; 2833; 1595; 23604; 10926; 1718; 1719; 115817; 81624; 9787; 1763; 80005; 11034; 79733; 1894; 133418; 2012; 2034; 54206; 11082; 116496; 2274; 63979; 2678; 2745; 2769; 10007; 3005; 3014; 55363; 3161; 51617; 8809; 7850; 3575; 10788; 3687; 3688; 9768; 57650; 23095; 10112; 3835; 9493; 10219; 3914; 3956; 3978; 9516; 4001; 122769; 4171; 4172; 255231; 4288; 84057; 51264; 4603; 4605; 4644; 9918; 64151; 54892; 10787; 10403; 55247; 4751; 83540; 51203; 55872; 10733; 5422; 5426; 5427; 5441; 9055; 5557;</p> |



|                                                                          |                |           |               |                                                                                                                                                                                                                                                                                                                                                                                                                                                                                                                                                                                                                                                                                                                                                                                                                                              |
|--------------------------------------------------------------------------|----------------|-----------|---------------|----------------------------------------------------------------------------------------------------------------------------------------------------------------------------------------------------------------------------------------------------------------------------------------------------------------------------------------------------------------------------------------------------------------------------------------------------------------------------------------------------------------------------------------------------------------------------------------------------------------------------------------------------------------------------------------------------------------------------------------------------------------------------------------------------------------------------------------------|
|                                                                          |                |           |               | 22949; 8438; 54502; 5979; 23433; 23433; 6094; 6095; 6281; 6275; 6275; 10505; 220134; 28232; 6652; 10615; 6713; 6491; 10460; 6941; 7153; 22974; 9697; 6302; 125488; 145567; 11065; 137886; 29128; 9094; 51201                                                                                                                                                                                                                                                                                                                                                                                                                                                                                                                                                                                                                                 |
| <b>Tcells.CD8.Exhausted.vs.Naive.2 Pauken Science.2016 PMID.27789795</b> | <b>T cells</b> | Signature | PMID.27789795 | 33; 54443; 9824; 84986; 55723; 259266; 79915; 580; 332; 83990; 699; 701; 57082; 836; 890; 891; 9133; 9134; 991; 995; 990; 157313; 83461; 113130; 55143; 1031; 1033; 1058; 1062; 1063; 64946; 64105; 401541; 55165; 1111; 26586; 150468; 1163; 1164; 63967; 55635; 1719; 81624; 9787; 79075; 51514; 1854; 79733; 1894; 30844; 54821; 157570; 9156; 2146; 2171; 26271; 2237; 63979; 2305; 9837; 3014; 3070; 3148; 3161; 7850; 3619; 3662; 9768; 57650; 3832; 56992; 3835; 9493; 24137; 9735; 3902; 3978; 4001; 4085; 9833; 4288; 4603; 4635; 64151; 54892; 23397; 10403; 55247; 4751; 83540; 51203; 132299; 55872; 5133; 5347; 10733; 5352; 5422; 5426; 9055; 5557; 55771; 5888; 10635; 5932; 5983; 79621; 6240; 6241; 151648; 79801; 10592; 10615; 147841; 57405; 6491; 3925; 256126; 10460; 6941; 22974; 9319; 7272; 7298; 11065; 7468; 6375 |
| <b>Tcells.CD8.Memory.vs.Naive.1 Pauken Science.2016 PMID.27789795</b>    | <b>T cells</b> | Signature | PMID.27789795 | 5243; 11332; 302; 8553; 55450; 822; 824; 834; 836; 837; 6352; 729230; 1234; 11126; 1154; 56253; 8530; 1493; 2833; 23191; 23258; 8411; 79180; 2012; 5167; 2123; 356; 2207; 10875; 115361; 2745; 9446; 3001; 3003; 3099; 84525; 3398; 10437; 3458; 3587; 8809; 9173; 10219; 3956; 3958; 9516; 56925; 23643;                                                                                                                                                                                                                                                                                                                                                                                                                                                                                                                                    |

|                                                                                        |                |           |                   |                                                                                                                                                                                                                                                                                                                                                                                                                                                                                                                                                             |
|----------------------------------------------------------------------------------------|----------------|-----------|-------------------|-------------------------------------------------------------------------------------------------------------------------------------------------------------------------------------------------------------------------------------------------------------------------------------------------------------------------------------------------------------------------------------------------------------------------------------------------------------------------------------------------------------------------------------------------------------|
|                                                                                        |                |           |                   | 256586; 29969; 8829; 4953; 8993; 123; 5359; 9055; 10549; 23433; 6281; 6275; 6277; 5269; 9047; 8935; 6645; 10402; 140738; 8784; 7133; 58485; 6302; 7305; 9094                                                                                                                                                                                                                                                                                                                                                                                                |
| <b>Tcells.Activation<br/>Petitprez<br/>Nature.2020<br/>PMID.31942077</b>               | <b>T cells</b> | Signature | PMID.31<br>942077 | 4283; 3627; 3458; 3600; 58191                                                                                                                                                                                                                                                                                                                                                                                                                                                                                                                               |
| <b>Tcells.Cluster Iglesia<br/>CCR.2014<br/>PMID.24916698</b>                           | <b>T cells</b> | Signature | PMID.24<br>916698 | 100188949; 8530; 9806; 2672; 497189; 140947; 5133; 11184; 9051; 11151; 11262; 115352; 29851; 1493; 4283; 56253; 9840; 729230; 959; 952; 57823; 3662; 54900; 387751; 84636; 256380; 151888; 925; 3003; 29909; 128611; 5790; 374403; 10663; 4063; 9744; 27240; 201633; 3932; 55423; 919; 84174; 3702; 10225; 4068; 921; 916; 914; 915; 2833; 114836; 3561; 53347; 6504; 149628; 939; 50852; 3001; 30009; 5778; 6352; 4818; 5551; 962; 154075; 917; 7535; 22914; 283897; 923; 5579; 8698; 8320; 387357; 356; 120425; 3718; 26279; 4049; 924; 1043; 3004; 27040 |
| <b>Tcells.Survival.2gene<br/>Petitprez<br/>Nature.2020<br/>PMID.31942077</b>           | <b>T cells</b> | Signature | PMID.31<br>942077 | 939; 970                                                                                                                                                                                                                                                                                                                                                                                                                                                                                                                                                    |
| <b>Tcells.Regulatory.cell<br/>I.2gene Petitprez<br/>Nature.2020<br/>PMID.31942077</b>  | <b>T cells</b> | Signature | PMID.31<br>942077 | 50943; 8784                                                                                                                                                                                                                                                                                                                                                                                                                                                                                                                                                 |
| <b>Tcells.Resident.Memory.<br/>Single.cell Savas<br/>NatMed.2018<br/>PMID.29942092</b> | <b>T cells</b> | Signature | PMID.29<br>942092 | 199; 356; 444; 478; 486; 925; 926; 928; 952; 953; 967; 1124; 1130; 1230; 1234; 1521; 1627; 2115; 2171; 2494; 2530; 2589; 2590; 2793; 2820; 2975; 2999; 3001; 3002; 3117; 3119; 3122; 3123; 3127; 3162; 3458; 3672; 3673; 3695; 3805; 3821; 3822; 3824; 3887; 3892; 3902; 3984; 4647; 4681; 4753; 4818; 4929; 5133; 5175; 5445; 5446; 5551; 5763;                                                                                                                                                                                                            |

|                                                                                               |                |           |                |                                                                                                                                                                                                                                                                                                                                                                                                                                                                                                                                                                                                                                                                                                                                                                                                                                                                                                          |
|-----------------------------------------------------------------------------------------------|----------------|-----------|----------------|----------------------------------------------------------------------------------------------------------------------------------------------------------------------------------------------------------------------------------------------------------------------------------------------------------------------------------------------------------------------------------------------------------------------------------------------------------------------------------------------------------------------------------------------------------------------------------------------------------------------------------------------------------------------------------------------------------------------------------------------------------------------------------------------------------------------------------------------------------------------------------------------------------|
|                                                                                               |                |           |                | 5921; 6003; 6348; 6351; 6983; 7273; 7292; 7412; 8110; 8214; 8302; 8320; 8395; 8441; 8482; 8538; 8543; 8572; 8611; 8848; 8875; 8903; 9022; 9242; 9289; 9495; 9523; 9560; 9576; 9666; 9760; 9788; 9901; 9976; 10253; 10447; 10510; 10529; 10578; 10839; 10863; 10962; 11098; 11145; 11182; 22914; 23604; 23665; 26228; 27333; 28531; 29083; 29988; 51225; 51232; 51655; 51744; 54072; 54438; 54674; 55084; 55501; 55653; 55784; 56253; 57121; 57196; 57406; 57493; 59342; 59345; 64127; 64218; 79070; 79895; 79899; 79931; 80119; 81553; 81563; 81618; 83903; 84056; 84329; 84632; 84868; 85302; 85379; 85458; 89987; 91937; 114614; 116841; 118788; 123355; 131450; 132332; 138948; 140739; 150763; 152100; 160335; 160365; 164668; 165186; 219931; 221184; 221188; 253782; 254559; 284406; 285025; 375775; 387923; 401124; 414062; 644150; 731247; 100287298; 100290966; 100505576; 100506776; 101927931 |
| <b>Tcells.MCP Petitprez Nature.2020 PMID.31942077</b>                                         | <b>T cells</b> | Signature | PMID.31 942077 | 940; 915; 917; 921; 923; 100506915; 1493; 2323; 29851; 4118; 348035; 80714; 55423; 387357; 8718; 50852                                                                                                                                                                                                                                                                                                                                                                                                                                                                                                                                                                                                                                                                                                                                                                                                   |
| <b>Tcells.CD8.Exhausted.Anti.PDL1.vs.Control.Metagene.1 Pauken Science.2016 PMID.27789795</b> | <b>T cells</b> | Signature | PMID.27 789795 | 65987; 2766; 3428; 7444; 55803; 84875; 27074; 6672; 25865; 8775; 51296; 127544; 355; 715; 7318; 6373; 1267; 116071; 3601; 55013; 10865; 84930; 201176; 94240; 10135; 29126; 3659; 57169; 83666; 54625; 129607; 115361; 4283; 941; 57162; 85463; 9753; 51365; 256586; 26750; 3574;                                                                                                                                                                                                                                                                                                                                                                                                                                                                                                                                                                                                                        |

|                                                                                                                                  |                       |                  |                            |                                                                                                                                                                                                                                                                                                                                                                                                                                                                                                                                                                                                                                                                                                                                                                                                                                                                                                                                                                                                                                                                                                                                                                                                                                                          |
|----------------------------------------------------------------------------------------------------------------------------------|-----------------------|------------------|----------------------------|----------------------------------------------------------------------------------------------------------------------------------------------------------------------------------------------------------------------------------------------------------------------------------------------------------------------------------------------------------------------------------------------------------------------------------------------------------------------------------------------------------------------------------------------------------------------------------------------------------------------------------------------------------------------------------------------------------------------------------------------------------------------------------------------------------------------------------------------------------------------------------------------------------------------------------------------------------------------------------------------------------------------------------------------------------------------------------------------------------------------------------------------------------------------------------------------------------------------------------------------------------|
|                                                                                                                                  |                       |                  |                            | <p>79370; 602; 834; 64853;<br/> 388646; 1616; 163351;<br/> 146857; 345611; 7098;<br/> 25939; 2634; 55905; 4084;<br/> 5168; 51284; 56937; 4343;<br/> 3959; 55281; 81030; 3627;<br/> 79132; 64108; 6772;<br/> 64761; 684; 3669; 6737;<br/> 3433; 3430; 10379; 3434;<br/> 5610; 4938; 103; 91543;<br/> 4599; 4940; 10561; 8638;<br/> 4600; 55601; 3665; 6773;<br/> 4939; 11274; 3594; 8375;<br/> 8374</p>                                                                                                                                                                                                                                                                                                                                                                                                                                                                                                                                                                                                                                                                                                                                                                                                                                                   |
| <p><b>Tcells.CD8.Exhauste<br/> d.at.day.8.post.Imm.<br/> vs.Naive.Metagene.1<br/> Pauken Science.2016<br/> PMID.27789795</b></p> | <p><b>T cells</b></p> | <p>Signature</p> | <p>PMID.27<br/> 789795</p> | <p>967; 4635; 5355; 411;<br/> 84868; 56925; 952;<br/> 158219; 5359; 8411;<br/> 54502; 10549; 2745; 840;<br/> 3559; 824; 79180; 4783;<br/> 22822; 5734; 1326; 6351;<br/> 5341; 57823; 84419;<br/> 197259; 23710; 1493; 307;<br/> 196383; 5996; 214; 50515;<br/> 125488; 26031; 116496;<br/> 6310; 493; 201633; 8836;<br/> 2012; 5272; 11034; 29887;<br/> 639; 2591; 23692; 10809;<br/> 301; 6095; 195; 3005;<br/> 8993; 11332; 3915; 22926;<br/> 23589; 11163; 7905; 5911;<br/> 2669; 202; 55794; 10930;<br/> 8347; 11172; 83988; 8524;<br/> 493869; 11082; 1524;<br/> 9839; 53637; 4644; 3092;<br/> 3684; 1509; 3683; 4542;<br/> 3398; 960; 81615; 54843;<br/> 51201; 3595; 118788;<br/> 54476; 79158; 27293;<br/> 2151; 3903; 6118; 5795;<br/> 93663; 3672; 10663;<br/> 22837; 57105; 22856;<br/> 2081; 10402; 115361; 597;<br/> 2149; 54206; 356; 6352;<br/> 1234; 8553; 8829; 5783;<br/> 6284; 23175; 3764; 2213;<br/> 56994; 23604; 3687;<br/> 80005; 3001; 3003; 30009;<br/> 8809; 3821; 84525; 5551;<br/> 8807; 2833; 3458; 8810;<br/> 1231; 10219; 22936; 3587;<br/> 29957; 7133; 10875; 837;<br/> 834; 6280; 6279; 23191;<br/> 10602; 199; 2769; 23075;<br/> 23258; 953; 822; 3958;<br/> 6277; 6275; 6281; 3956;<br/> 302; 9516; 968; 23433;</p> |

|                                                                                   |                |           |               |                                                                                                                                                                                                                                                                                                                                                                                                                                                                                                                                                                                                                                                                                                                                                                                                                                                          |
|-----------------------------------------------------------------------------------|----------------|-----------|---------------|----------------------------------------------------------------------------------------------------------------------------------------------------------------------------------------------------------------------------------------------------------------------------------------------------------------------------------------------------------------------------------------------------------------------------------------------------------------------------------------------------------------------------------------------------------------------------------------------------------------------------------------------------------------------------------------------------------------------------------------------------------------------------------------------------------------------------------------------------------|
|                                                                                   |                |           |               | 941; 9173; 10995; 11110; 79026; 84564; 91663; 93992; 160851; 729230                                                                                                                                                                                                                                                                                                                                                                                                                                                                                                                                                                                                                                                                                                                                                                                      |
| <b>Tcells.CD8.Exhausted.vs.Naive.Metagene.1 Pauken Science.2016 PMID.27789795</b> | <b>T cells</b> | Signature | PMID.27789795 | 118788; 7227; 942; 2650; 941; 929; 952; 57823; 29992; 80219; 4067; 55300; 3552; 5272; 3606; 10410; 55281; 3601; 1390; 10950; 64135; 3627; 153020; 84419; 221079; 91543; 9246; 629; 3600; 8676; 51296; 3669; 6648; 840; 8743; 9636; 10581; 3587; 219972; 10561; 23429; 79931; 2820; 84930; 338339; 64108; 23424; 56829; 1326; 5359; 10260; 25932; 115361; 10018; 10135; 10538; 3428; 837; 3586; 597; 3559; 4938; 25801; 9034; 5610; 1536; 80231; 11274; 7128; 132864; 439996; 2643; 85463; 55013; 602; 10437; 7097; 3656; 3437; 54739; 4792; 8870; 1026; 4084; 3553; 6351; 3665; 23643; 26471; 1263; 6004; 3434; 6280; 2921; 3604; 9334; 29126; 64332; 127544; 64761; 1846; 5341; 64092; 196383; 2669; 5996; 6357; 4616; 5734; 1847; 8013; 65108; 7050; 4783; 22822; 79720; 467; 4929; 7832; 1843; 1958; 9592; 23764; 3164; 2355; 1051; 80824; 8376; 8374 |
| <b>Tcells.CD8.Exhausted.vs.Naive.Metagene.3 Pauken Science.2016 PMID.27789795</b> | <b>T cells</b> | Signature | PMID.27789795 | 3001; 30009; 3897; 3458; 3683; 54843; 50515; 10219; 3672; 10663; 8809; 23191; 6284; 3903; 3092; 29887; 5795; 3915; 5551; 8411; 2207; 356; 4644; 158219; 54476; 56994; 960; 493869; 81615; 214; 23710; 2149; 2833; 64065; 9497; 8807; 22936; 1231; 6118; 93663; 3821; 195; 639; 53637; 22837; 79158; 29957; 307; 8836; 56925; 493; 80005; 3003; 23604; 27293; 54502; 3956; 5911; 1234; 411; 8993; 29851; 5243; 23589; 4542; 23208;                                                                                                                                                                                                                                                                                                                                                                                                                        |

|                                                                                             |                |           |                   |                                                                                                                                                                                                                                                                                                                                                                                                                                                                                                                                                                                                                   |
|---------------------------------------------------------------------------------------------|----------------|-----------|-------------------|-------------------------------------------------------------------------------------------------------------------------------------------------------------------------------------------------------------------------------------------------------------------------------------------------------------------------------------------------------------------------------------------------------------------------------------------------------------------------------------------------------------------------------------------------------------------------------------------------------------------|
|                                                                                             |                |           |                   | 2591; 23175; 2745; 79156; 11034; 7133; 3684; 23692; 6279; 23433; 9516; 84868; 10549; 201633; 8320; 3800; 302; 8435; 2151; 10602; 8553; 8829; 3005; 333926; 5167; 7905; 57105; 11172; 834; 6310; 3764; 11082; 9749; 51201; 10930; 7498; 3595; 22856; 9839; 23075; 23258; 2213; 11163; 125488; 6095; 8530; 11332; 7703; 29969; 84525; 1154; 1493; 728392; 79180; 6352; 202; 5179; 116496; 6275; 140738; 197259; 1524; 3398; 11006; 3958; 22926; 6277; 55450; 824; 967; 51744; 11126; 10875; 4818; 199; 8819; 2012; 26031; 8810; 301; 5783; 10809; 953; 3687; 54206; 9173; 91663; 729230; 10995; 84564; 79026; 11110 |
| <b>Tcells.CD8.Memory.v<br/>s.Naive.Metagene.1<br/>Pauken Science.2016<br/>PMID.27789795</b> | <b>T cells</b> | Signature | PMID.27<br>789795 | 256586; 55450; 1154; 5269; 4953; 8784; 1493; 29969; 7133; 8810; 9446; 2012; 824; 56253; 140738; 837; 834; 5167; 115361; 8553; 1234; 10402; 3398; 79180; 8530; 9047; 11126; 8829; 8993; 84525; 8809; 356; 2833; 3458; 6352; 3001; 3003; 1231; 10219; 5243; 123; 6645; 836; 10549; 3587; 23258; 9094; 822; 6277; 6275; 6281; 3958; 3956; 302; 728392; 2745; 3099; 6302; 11332; 58485; 9055; 10875; 23643; 10437; 2207; 7305; 2123; 5359; 8411; 9516; 8935; 23433; 23191; 56925; 10995; 729230; 80792; 9173                                                                                                          |
| <b>Tcells.CD8.Memory.v<br/>s.Naive.Metagene.2<br/>Pauken Science.2016<br/>PMID.27789795</b> | <b>T cells</b> | Signature | PMID.27<br>789795 | 11238; 29851; 57105; 22856; 23092; 2769; 118788; 23075; 953; 8524; 23710; 27120; 94120; 6310; 493; 201633; 54836; 54843; 598; 26031; 245972; 411; 54476; 79158; 27293; 11082; 2081; 2591; 125488;                                                                                                                                                                                                                                                                                                                                                                                                                 |

|                                                                                                       |                       |                  |                            |                                                                                                                                                                                                                                                                                                                                                                                                                                                                                                                                                                                                                                                                                                                                                                                                                                                                       |
|-------------------------------------------------------------------------------------------------------|-----------------------|------------------|----------------------------|-----------------------------------------------------------------------------------------------------------------------------------------------------------------------------------------------------------------------------------------------------------------------------------------------------------------------------------------------------------------------------------------------------------------------------------------------------------------------------------------------------------------------------------------------------------------------------------------------------------------------------------------------------------------------------------------------------------------------------------------------------------------------------------------------------------------------------------------------------------------------|
|                                                                                                       |                       |                  |                            | <p>389072; 5576; 7703;<br/> 51201; 2151; 10663; 5795;<br/> 3903; 6118; 3897; 3672;<br/> 22837; 960; 5214; 4542;<br/> 6095; 195; 4644; 93663;<br/> 1509; 84650; 2213; 23692;<br/> 3687; 301; 23175; 10809;<br/> 23604; 3764; 3004; 80005;<br/> 11345; 3595; 30009; 4818;<br/> 2149; 5783; 3683; 5551;<br/> 56994; 8807; 3821; 9497;<br/> 57412; 493869; 5911;<br/> 1524; 9839; 53637;<br/> 154075; 2034; 79156;<br/> 197259; 54331; 158219;<br/> 33; 4635; 79634; 127124;<br/> 63951; 3006; 8819; 214;<br/> 50515; 116496; 307;<br/> 11163; 29887; 3005;<br/> 22926; 3915; 7905; 6284;<br/> 23589; 8836; 11034; 639;<br/> 81615; 202; 1891; 5613;<br/> 29957; 80150; 168537;<br/> 333926; 10930; 55794;<br/> 8347; 11172; 83988; 3820;<br/> 3684; 3459; 8905; 54502;<br/> 199; 644; 84868; 11110;<br/> 114242; 160851; 79026;<br/> 84564; 89875; 91663;<br/> 93992</p> |
| <p><b>Tcells.CD8.Memory.v<br/> s.Naive.Metagene.3<br/> Pauken Science.2016<br/> PMID.27789795</b></p> | <p><b>T cells</b></p> | <p>Signature</p> | <p>PMID.27<br/> 789795</p> | <p>941; 23670; 3559; 3662;<br/> 6504; 10538; 64092;<br/> 112574; 81553; 3555;<br/> 22936; 7227; 952; 5606;<br/> 5272; 4860; 3627; 3600;<br/> 3665; 64135; 11274; 5341;<br/> 366; 153020; 5966; 11080;<br/> 23429; 3606; 10260; 8444;<br/> 221079; 9693; 80149;<br/> 56300; 8767; 1647; 10950;<br/> 29933; 1326; 255231;<br/> 3475; 54206; 597; 8870;<br/> 1847; 9034; 23135; 23764;<br/> 6351; 2643; 6648; 2180;<br/> 1844; 7124; 3553; 3552;<br/> 2921; 7128; 4792; 29126;<br/> 64332; 8740; 80231; 1992;<br/> 25932; 1051; 51296;<br/> 10602; 11213; 3303; 1536;<br/> 929; 6280; 6279; 59342;<br/> 2212; 3162; 29992; 84419;<br/> 11006; 942; 967; 4067;<br/> 6775; 57823; 132864;<br/> 196383; 1880; 25976;<br/> 57485; 79720; 7050;<br/> 30015; 4793; 5932; 3725;</p>                                                                                             |

|                                                                   |                |           |                   |                                                                                                                                                                                                                                                                                                                                                                                                                                                                                                                                                                                                                                                                                                                                                                                                                                                                                                                                                                                                  |
|-------------------------------------------------------------------|----------------|-----------|-------------------|--------------------------------------------------------------------------------------------------------------------------------------------------------------------------------------------------------------------------------------------------------------------------------------------------------------------------------------------------------------------------------------------------------------------------------------------------------------------------------------------------------------------------------------------------------------------------------------------------------------------------------------------------------------------------------------------------------------------------------------------------------------------------------------------------------------------------------------------------------------------------------------------------------------------------------------------------------------------------------------------------|
|                                                                   |                |           |                   | 6236; 10221; 6520; 2669; 5996; 1164; 2717; 9456; 255758; 4783; 388; 22822; 7832; 1843; 3726; 9592; 3164; 2355; 467; 80219; 2354; 1390; 4929; 5734; 8013; 84275; 10253; 6498; 10206; 9683; 80824; 7185; 3383; 330; 65108; 4616; 85463; 4794; 1026; 6675; 5292; 127544; 338339; 8878; 4780; 222255; 51278; 7850                                                                                                                                                                                                                                                                                                                                                                                                                                                                                                                                                                                                                                                                                    |
| <b>Serum.Response.Up<br/>TCGA Immunity.2018<br/>PMID.29628290</b> | <b>T cells</b> | Signature | PMID.29<br>628290 | 84131; 27258; 55631; 9263; 6184; 3726; 79902; 2318; 3151; 10799; 29796; 7965; 1111; 51534; 11340; 79172; 56902; 6566; 79084; 51465; 51491; 4521; 10592; 292; 9818; 8847; 11333; 56267; 10063; 56647; 5340; 85397; 6631; 10733; 10204; 25804; 6611; 10969; 93081; 7416; 10213; 26292; 64750; 2791; 2152; 3575; 83990; 8399183990; 83991; 3181; 1633; 84266; 56263; 9086156263; 90861; 4478; 7168; 219844; 115106; 9688; 6635; 3655; 55839; 53838; 8836; 5214; 2193; 27102; 387103; 7277; 6434; 7372; 51154; 55270; 5237; 55276; 79007; 6628; 4331; 129401; 6921; 51668; 84798; 3399; 79711; 10056; 1981; 220134; 79157; 5329; 153562; 4172; 1719; 10193; 3398; 3015; 1017; 56926; 55055; 6993; 56942; 55972; 389; 22948; 9601; 6626; 10432; 9260; 26207; 7170; 23603; 10613; 5059; 106065059; 10606; 51002; 348235; 4603; 80851; 675; 56681; 51728; 28957; 6494728957; 64947; 57122; 7283; 5411; 83648; 5983; 4637; 4176; 55110; 23625; 10452; 55038; 4504; 4522; 5718; 4605; 51192; 56675; 7430; |



|                                                                                          |                |           |                   |                                                                                                                                                                                                                                                                                                                                                                                                                                                                                                                                                                              |
|------------------------------------------------------------------------------------------|----------------|-----------|-------------------|------------------------------------------------------------------------------------------------------------------------------------------------------------------------------------------------------------------------------------------------------------------------------------------------------------------------------------------------------------------------------------------------------------------------------------------------------------------------------------------------------------------------------------------------------------------------------|
|                                                                                          |                |           |                   | 29902; 2822; 6723; 5865; 57486; 4494; 51330; 7167; 3037; 79135; 150726; 51253; 79807; 6382; 84058; 51444; 378708; 64777; 2023; 1326; 222865; 9784; 11103; 6876; 5036; 8607; 6632; 4017; 5427; 22919; 92856; 2013; 5708; 4233; 7866; 3999; 848233999; 84823; 5352; 57552; 4830; 6800; 201254; 86; 10301; 6627; 10951; 55646; 9199; 5216; 55835; 23406; 57213; 10208; 6182; 9510; 10539; 55884; 51021; 6495951021; 64959; 64858; 8195; 84319; 80315; 200162; 359815; 6675; 27235; 11169; 131566; 23065; 51128; 5688; 5702; 10980; 1854; 10465; 26147; 7169; 28985; 1978; 10236 |
| <b>Lymphocyte.Infiltration.Expression.Score<br/>TCGA Immunity.2018<br/>PMID.29628290</b> | <b>T cells</b> | Signature | PMID.29<br>628290 | 6352; 930; 951; 915; 916; 917; 919; 973; 974; 925; 926; 3502; 28219; 3512; 3537; 28840; 929; 3932; 4050; 931                                                                                                                                                                                                                                                                                                                                                                                                                                                                 |
| <b>Tcells.Follicular.Helper<br/>TCGA<br/>Immunity.2018<br/>PMID.29628290</b>             | <b>T cells</b> | Signature | PMID.29<br>628290 | 27087; 643; 753; 8851; 1114; 1117; 10563; 23462; 8362; 3382; 8645; 57535; 4094; 28986; 57496; 4646; 4647; 23178; 5133; 10585; 5783; 5816; 54436; 55423; 56301; 4086; 7972; 6489; 27347; 63892; 9760; 7253; 92595                                                                                                                                                                                                                                                                                                                                                             |
| <b>Tcells.Gamma.Delta<br/>TCGA Immunity.2018<br/>PMID.29628290</b>                       | <b>T cells</b> | Signature | PMID.29<br>628290 | 10485; 11126; 9638; 445347; 6964; 6983; 28531                                                                                                                                                                                                                                                                                                                                                                                                                                                                                                                                |
| <b>Immune.CD8.GZMK<br/>TCGA.BRCA.1198<br/>JCI.2020<br/>PMID.32573490</b>                 | <b>T cells</b> | Signature | PMID.32<br>573490 | 729230; 497189; 1236; 2672; 387357; 84636; 387751; 10666; 959; 115352; 5133; 100188949; 120425; 9840; 56253; 8320; 283897; 5579; 22914; 256380; 29851; 201633; 29909; 151888; 128611; 925; 10663; 154075; 50852; 3003; 149628; 30009; 3001; 939; 4063; 6504; 4068; 114836; 917; 3702; 10225; 55423; 53347; 3932; 2833; 27240;                                                                                                                                                                                                                                                |

|                                                                               |                |           |                   |                                                                                                                                                                                                                                                                                                                                                                                                                                                                                                                                                                                                                                                                                                                                                                                                                                                                                     |
|-------------------------------------------------------------------------------|----------------|-----------|-------------------|-------------------------------------------------------------------------------------------------------------------------------------------------------------------------------------------------------------------------------------------------------------------------------------------------------------------------------------------------------------------------------------------------------------------------------------------------------------------------------------------------------------------------------------------------------------------------------------------------------------------------------------------------------------------------------------------------------------------------------------------------------------------------------------------------------------------------------------------------------------------------------------|
|                                                                               |                |           |                   | 915; 914; 916; 919; 921; 3561; 962; 84174; 6352; 4818; 5551; 923; 79037; 3004; 5790; 8698; 7535; 9744; 1731; 374403; 64926; 147138; 11184; 11151; 9051; 27040; 3718; 9806; 11262; 8530; 1043; 924; 80342                                                                                                                                                                                                                                                                                                                                                                                                                                                                                                                                                                                                                                                                            |
| <b>Immune.Cell.Content<br/>Verhaak<br/>NatCommun.2013<br/>PMID.24113773</b>   | <b>T cells</b> | Signature | PMID.24<br>113773 | 10320; 9910; 3575; 55303; 3106; 3937; 4046; 2533; 5341; 3055; 3587; 10859; 3071; 3903; 4688; 1536; 5788; 7805; 963; 2124; 6503; 3689; 4542; 3059; 4332; 3561; 962; 313; 6352; 4050; 9535; 474344; 3003; 7940; 8477; 10288; 7456; 951; 51411; 2207; 7305; 10875; 2313; 3394; 55843; 10019; 7133; 1794; 914; 9459; 11151; 23643; 4069; 3683; 7128; 6039; 7040; 9051; 8530; 5996; 2268; 6402; 64780; 80342; 3676; 9935; 397; 3566; 399; 3113; 4818; 4689; 9404; 3702; 6404; 3115; 915; 11314; 3560; 113; 5734; 5552; 919; 1236; 4478; 241; 5732; 5880; 2634; 7409; 9976; 9934; 4792; 6280; 10437; 64747; 9770; 1200; 391; 50856; 3002; 79037; 6279; 834; 597; 3133; 3820; 10578; 5873; 8807; 8459; 2014; 51291; 3932; 9235; 5790; 3965; 26112; 25939; 6890; 2633; 1520; 2999; 101; 2745; 5551; 969; 3108; 972; 22914; 5791; 3122; 8875; 10312; 1475; 7535; 3134; 3135; 1043; 9936; 939 |
| <b>TLS.Hallmark Cabrita<br/>Nature.2020<br/>PMID.31942071</b>                 | <b>TLS</b>     | Signature | PMID.31<br>942071 | 6363; 6366; 10563; 1236; 643; 27074; 6402                                                                                                                                                                                                                                                                                                                                                                                                                                                                                                                                                                                                                                                                                                                                                                                                                                           |
| <b>TLS.Known.Markers<br/>Cabrita Nature.2020<br/>PMID.31942071</b>            | <b>TLS</b>     | Signature | PMID.31<br>942071 | 1236; 10563; 6363; 7852; 6366; 27074; 942; 604; 6402                                                                                                                                                                                                                                                                                                                                                                                                                                                                                                                                                                                                                                                                                                                                                                                                                                |
| <b>TLS.12genes.Chemo<br/>kine Zhu<br/>FrontImmunol.2017<br/>PMID.28713385</b> | <b>TLS</b>     | Signature | PMID.28<br>713385 | 6348; 6347; 10563; 6366; 4283; 6355; 6363; 6352; 6373; 6351; 6362; 3627                                                                                                                                                                                                                                                                                                                                                                                                                                                                                                                                                                                                                                                                                                                                                                                                             |

|                                                                                                    |                   |                  |                           |                                                                                                                                                                                                                                                                                                                                                                                                             |
|----------------------------------------------------------------------------------------------------|-------------------|------------------|---------------------------|-------------------------------------------------------------------------------------------------------------------------------------------------------------------------------------------------------------------------------------------------------------------------------------------------------------------------------------------------------------------------------------------------------------|
| <p><b>TLS.High.In.No.Resp<br/>onse Helmin<br/>k Nature.2020<br/>PMID.31942075</b></p>              | <p><b>TLS</b></p> | <p>Signature</p> | <p>PMID.31<br/>942075</p> | <p>51129; 7079; 80760; 4017;<br/>5046; 5055; 374; 3451;<br/>5212; 347; 8534; 133;<br/>1917; 79884; 7056; 5522;<br/>8862; 57722; 147495;<br/>6098; 27295; 4099; 8515;<br/>154664; 2260; 27237;<br/>63982; 79054; 374946;<br/>84929; 148281; 200162;<br/>6620; 5009; 114788;<br/>23743; 7087; 89886; 1770;<br/>55511</p>                                                                                      |
| <p><b>TLS.High.In.Respons<br/>e.MCP Helmin<br/>k Nature.2020<br/>PMID.31942075</b></p>             | <p><b>TLS</b></p> | <p>Signature</p> | <p>PMID.31<br/>942075</p> | <p>4283; 2633; 3001; 915;<br/>3627; 8115; 973; 9235;<br/>3620; 3512; 5450; 6890;<br/>710; 51237; 3821; 923;<br/>158471; 3659; 3458; 5920;<br/>115361; 10396; 151888;<br/>3824; 54900; 83416;<br/>26279; 8368; 56145;<br/>56146; 8395; 55118;<br/>260436; 3738; 100423062;<br/>91319; 389643</p>                                                                                                             |
| <p><b>TLS.9genes Cabrita<br/>Nature.2020<br/>PMID.31942071</b></p>                                 | <p><b>TLS</b></p> | <p>Signature</p> | <p>PMID.31<br/>942071</p> | <p>5730; 912; 974; 1235;<br/>27040; 1071; 83758; 9086;<br/>8631</p>                                                                                                                                                                                                                                                                                                                                         |
| <p><b>TLS.Tumors.w.TLS.a<br/>nd.CD8.vs.CD8.alone<br/>Cabrita Nature.2020<br/>PMID.31942071</b></p> | <p><b>TLS</b></p> | <p>Signature</p> | <p>PMID.31<br/>942071</p> | <p>962; 4050; 1043; 915;<br/>6402; 80342; 939; 51316;<br/>9595; 973; 1236; 974;<br/>4033; 952; 3957; 917; 919;<br/>3512; 330; 51237; 6363;<br/>8875; 6366; 730; 5790;<br/>3112; 3394; 923; 27040;<br/>912; 5730; 971; 54923;<br/>1235; 7351; 54900; 64333;<br/>374403; 81704; 11040;<br/>9086; 54855; 1776; 5777;<br/>5336; 8631; 55840;<br/>114836; 160365; 202309;<br/>115352; 83758; 1071;<br/>79037</p> |

**eTable 2. Comparison of Baseline Characteristics of the Patients From the CALGB 40601 Event-Free Survival (EFS) and Landmark Subpopulations**

| Characteristic                | CALGB40601<br>EFS cohort<br>(N = 230) | CALGB40601<br>Landmark cohort<br>(N = 227) | p-value |
|-------------------------------|---------------------------------------|--------------------------------------------|---------|
| <b>Age (median, IQ range)</b> | 49 (41, 56)                           | 49 (41, 56)                                | NS      |
| <b>Menopause status</b>       |                                       |                                            | NS      |
| Postmenopausal                | 89 (38.70%)                           | 87 (38.33%)                                |         |
| Premenopausal                 | 141 (61.30%)                          | 140 (61.67%)                               |         |
| <b>HR status</b>              |                                       |                                            | NS      |
| HR-negative                   | 93 (40.43%)                           | 91 (40.09%)                                |         |
| HR-positive                   | 137 (59.57%)                          | 136 (59.91%)                               |         |
| <b>Clinical Stage</b>         |                                       |                                            | NS      |
| Stage I                       | 0 (0%)                                | 0 (0%)                                     |         |
| Stage II                      | 157 (68.26%)                          | 156 (68.72%)                               |         |
| Stage III                     | 73 (31.74%)                           | 71 (31.28%)                                |         |
| <b>Treatment</b>              |                                       |                                            | NS      |
| HL +/- ET                     | 0 (0%)                                | 0 (0%)                                     |         |
| TH                            | 89 (38.70%)                           | 87 (38.33%)                                |         |
| THL                           | 95 (41.30%)                           | 95 (41.85%)                                |         |
| TL                            | 46 (20%)                              | 45 (19.82%)                                |         |
| <b>Intrinsic subtype</b>      |                                       |                                            | NS      |
| Basal-like                    | 19 (8.26%)                            | 19 (8.37%)                                 |         |
| HER2-Enriched                 | 131 (56.96%)                          | 129 (56.83%)                               |         |
| Luminal A                     | 26 (11.30%)                           | 26 (11.45%)                                |         |
| Luminal B                     | 32 (13.91%)                           | 31 (13.66%)                                |         |
| Normal-like                   | 22 (9.57%)                            | 22 (9.69%)                                 |         |

Statistical differences were assessed using a Wilcoxon rank sum test (for the age) and Pearson's Chi-squared test (for the rest of the variables).

EFS: event-free survival; IQ: interquartile range; HR: hormone receptor; H: trastuzumab; L: lapatinib; ET: endocrine therapy; T: weekly paclitaxel; NS: no significant.

**eTable 3. Correlation of Tumor-Infiltrating Lymphocytes (TILs) and Immune Gene Expression Signatures (iGES) in CALGB 40601 and PAMELA**

| <b>CALGB 40601</b>                                                      | <b>Coefficient</b> | <b>p-value</b> | <b>Coefficient tertiles</b> | <b>p-value tertiles</b> |
|-------------------------------------------------------------------------|--------------------|----------------|-----------------------------|-------------------------|
| Immune1 TCGA.BRCA.1198 JCI.2020 PMID.32573490                           | 0.61               | <0.001         | 0.53                        | <0.001                  |
| Stromal.Inflammation Heng JPathol.2017 PMID.27861902                    | 0.6                | <0.001         | 0.54                        | <0.001                  |
| TLS.High.In.Response.MCP Helmink Nature.2020 PMID.31942075              | 0.6                | <0.001         | 0.53                        | <0.001                  |
| IFN.5.ImmLandscape Wolf PlosOne.2014 PMID.24516633                      | 0.59               | <0.001         | 0.55                        | <0.001                  |
| Tcells.CD4.Memory.Activated CIBERSORT NatMethods.2015 PMID.25822800     | 0.59               | <0.001         | 0.57                        | <0.001                  |
| Plasma.cells ImSig.Nirmal CancerImmunolRes.2018 PMID.30266715           | 0.59               | <0.001         | 0.51                        | <0.001                  |
| NK.CD56dim Bindea Immunity.2013 PMID.24138885                           | 0.58               | <0.001         | 0.52                        | <0.001                  |
| Immune.Active Hollern Cell.2019 PMID.31730857                           | 0.57               | <0.001         | 0.50                        | <0.001                  |
| CTLA4.Single.Gene Hollern Cell.2019 PMID.31730857                       | 0.57               | <0.001         | 0.51                        | <0.001                  |
| Tcells.Cluster Iglesia CCR.2014 PMID.24916698                           | 0.56               | <0.001         | 0.49                        | <0.001                  |
| Bcells.Plasma.cells.52genes Miller GenomeBiol.2013 PMID.23618380        | 0.56               | <0.001         | 0.52                        | <0.001                  |
| IGG.Cluster Fan BMCMedGenomics.2011 PMID.21214954                       | 0.56               | <0.001         | 0.51                        | <0.001                  |
| PDCD1.Single.Gene Pare AnnOncol.2019 PMID.30165419                      | 0.56               | <0.001         | 0.50                        | <0.001                  |
| Macrophages.M1 CIBERSORT NatMethods.2015 PMID.25822800                  | 0.55               | <0.001         | 0.51                        | <0.001                  |
| Immune.CD8.GZMK TCGA.BRCA.1198 JCI.2020 PMID.32573490                   | 0.55               | <0.001         | 0.48                        | <0.001                  |
| CD8.Cluster Iglesia CCR.2014 PMID.24916698                              | 0.55               | <0.001         | 0.47                        | <0.001                  |
| Cytotoxic.Lymphocytes.MCP Petitprez Nature.2020 PMID.31942077           | 0.55               | <0.001         | 0.51                        | <0.001                  |
| Cytotoxic.cells Bindea Immunity.2013 PMID.24138885                      | 0.55               | <0.001         | 0.49                        | <0.001                  |
| Tcells.Survival.2gene Petitprez Nature.2020 PMID.31942077               | 0.55               | <0.001         | 0.49                        | <0.001                  |
| CTLA4.Pathway GSEA.BIOCARTA ProcNatlAcadSciUSA.2005 PMID.16199517       | 0.55               | <0.001         | 0.49                        | <0.001                  |
| Immune.CTLA4.CXCL.FOXP3 TCGA.BRCA.1198 JCI.2020 PMID.32573490.          | 0.55               | <0.001         | 0.52                        | <0.001                  |
| Immune.Suppression Kardos JCIInsight.2016 PMID.27699256                 | 0.54               | <0.001         | 0.52                        | <0.001                  |
| Tcells.CD8.Memory.vs.Naive.Metagene.3 Pauken Science.2016 PMID.27789795 | 0.54               | <0.001         | 0.50                        | <0.001                  |
| Ig TCGA.BRCA.1198 Cell.2015 PMID.26451490                               | 0.54               | <0.001         | 0.49                        | <0.001                  |

|                                                                                   |      |        |      |        |
|-----------------------------------------------------------------------------------|------|--------|------|--------|
| Tcells.Gamma.Delta CIBERSORT<br>NatMethods.2015 PMID.25822800                     | 0.54 | <0.001 | 0.45 | <0.001 |
| MERCK.Immune.Signature Cristescu<br>Science.2018 PMID.30309915                    | 0.54 | <0.001 | 0.45 | <0.001 |
| Immune.87 Perez JCO.2015 PMID.2560586                                             | 0.54 | <0.001 | 0.46 | <0.001 |
| Tcells.Th1.cells Bindea Immunity.2013<br>PMID.24138885                            | 0.54 | <0.001 | 0.53 | <0.001 |
| CD274.Single.Gene Hollern Cell.2019<br>PMID.31730857                              | 0.54 | <0.001 | 0.51 | <0.001 |
| Bcells.Immature Charoentong CellRep.2017<br>PMID.28052254                         | 0.54 | <0.001 | 0.48 | <0.001 |
| Tcells.CD8 CIBERSORT NatMethods.2015<br>PMID.25822800                             | 0.53 | <0.001 | 0.47 | <0.001 |
| NK.Resting CIBERSORT NatMethods.2015<br>PMID.25822800                             | 0.53 | <0.001 | 0.45 | <0.001 |
| Immune.cell.Cluster.PerouLab<br>Fan.GSEA.GP2 BMCMedGenomics.2011<br>PMID.21214954 | 0.53 | <0.001 | 0.51 | <0.001 |
| Tcells.MCP Petitprez Nature.2020<br>PMID.31942077                                 | 0.53 | <0.001 | 0.48 | <0.001 |
| Immune.Hot.vs.Cold.CD8 Cabrita<br>Nature.2020 PMID.31942071                       | 0.53 | <0.001 | 0.48 | <0.001 |
| Immune.CD4.CD53.CD84.BTK<br>TCGA.BRCA.1198 JCI.2020 PMID.32573490                 | 0.53 | <0.001 | 0.48 | <0.001 |
| MHC.II Rody BreastCancerResearch.2008<br>PMID.19272155                            | 0.53 | <0.001 | 0.47 | <0.001 |
| Tcells.Resident.Memory.Single.cell Savas<br>NatMed.2018 PMID.29942092             | 0.52 | <0.001 | 0.46 | <0.001 |
| Tcells.Follicular.Helper CIBERSORT<br>NatMethods.2015 PMID.25822800               | 0.52 | <0.001 | 0.45 | <0.001 |
| Tcells.CD4.Memory.Resting CIBERSORT<br>NatMethods.2015 PMID.25822800              | 0.52 | <0.001 | 0.42 | <0.001 |
| Tcells Bindea Immunity.2013<br>PMID.24138885                                      | 0.52 | <0.001 | 0.42 | <0.001 |
| Tcells.Th1.cells Charoentong CellRep.2017<br>PMID.28052254                        | 0.52 | <0.001 | 0.46 | <0.001 |
| Cytolytic.Activity Rooney Cell.2015<br>PMID.25594174                              | 0.51 | <0.001 | 0.45 | <0.001 |
| NK ImSig.Nirmal CancerImmunolRes.2018<br>PMID.30266715                            | 0.51 | <0.001 | 0.48 | <0.001 |
| MCD3.CD8 Fan BMCMedGenomics.2011<br>PMID.21214954                                 | 0.51 | <0.001 | 0.43 | <0.001 |
| NK.Activated CIBERSORT NatMethods.2015<br>PMID.25822800                           | 0.51 | <0.001 | 0.46 | <0.001 |
| Dendritic.cells.Activated Bindea<br>Immunity.2013 PMID.24138885                   | 0.51 | <0.001 | 0.51 | <0.001 |
| Macrophages.Th1.Cluster Iglesia CCR.2014<br>PMID.24916698                         | 0.51 | <0.001 | 0.48 | <0.001 |
| Tcells.CD8.Activated Charoentong<br>CellRep.2017 PMID.28052254                    | 0.51 | <0.001 | 0.45 | <0.001 |
| STAT1 Rody BreastCancerResearch.2008<br>PMID.19272155                             | 0.5  | <0.001 | 0.48 | <0.001 |
| Tcells.Regulatory.Tregs CIBERSORT<br>NatMethods.2015 PMID.25822800                | 0.5  | <0.001 | 0.41 | <0.001 |

|                                                                                                     |      |        |      |        |
|-----------------------------------------------------------------------------------------------------|------|--------|------|--------|
| TLS.Tumors.w.TLS.and.CD8.vs.CD8.alone<br>Cabrita Nature.2020 PMID.31942071                          | 0.5  | <0.001 | 0.44 | <0.001 |
| Plasma.cells CIBERSORT NatMethods.2015<br>PMID.25822800                                             | 0.5  | <0.001 | 0.45 | <0.001 |
| Bcells.IL10.Plus Lin JImmunol.2014<br>PMID.25080484                                                 | 0.5  | <0.001 | 0.48 | <0.001 |
| Macrophages.Monocytes.CSF1.Response<br>Beck CCR.2009 PMID.19188147                                  | 0.5  | <0.001 | 0.49 | <0.001 |
| CSF1.Response TCGA Immunity.2018<br>PMID.29628290                                                   | 0.5  | <0.001 | 0.49 | <0.001 |
| MDSC Charoentong CellRep.2017<br>PMID.28052254                                                      | 0.5  | <0.001 | 0.50 | <0.001 |
| Tcells.CD8.Exhausted.at.day.8.post.Imm.vs.<br>Naive.Metagene.1 Pauken Science.2016<br>PMID.27789795 | 0.5  | <0.001 | 0.47 | <0.001 |
| Bcells.Cluster Iglesia CCR.2014<br>PMID.24916698                                                    | 0.5  | <0.001 | 0.48 | <0.001 |
| Tcells.CD8.Memory.vs.Naive.1 Pauken<br>Science.2016 PMID.27789795                                   | 0.5  | <0.001 | 0.45 | <0.001 |
| Tcells.CD8.Memory.vs.Naive.Metagene.1<br>Pauken Science.2016 PMID.27789795                          | 0.5  | <0.001 | 0.45 | <0.001 |
| Tcells.NK.51genes Miller GenomeBiol.2013<br>PMID.23618380                                           | 0.49 | <0.001 | 0.42 | <0.001 |
| Immune.Cell.Content Verhaak<br>NatCommun.2013 PMID.24113773                                         | 0.49 | <0.001 | 0.46 | <0.001 |
| Tcells ImSig.Nirmal CancerImmunolRes.2018<br>PMID.30266715                                          | 0.49 | <0.001 | 0.42 | <0.001 |
| LCK Rody BreastCancerResearch.2008<br>PMID.19272155                                                 | 0.49 | <0.001 | 0.46 | <0.001 |
| Tcells.Bcells.Lymphocyte.Infiltration Calabro<br>BreastCancerResTreat.2009 PMID.18592372            | 0.49 | <0.001 | 0.39 | <0.001 |
| Lymphocyte.Infiltration.Expression.Score<br>TCGA Immunity.2018 PMID.29628290                        | 0.49 | <0.001 | 0.39 | <0.001 |
| Tcells.CD8.Exhausted.vs.Naive.Metagene.1<br>Pauken Science.2016 PMID.27789795                       | 0.49 | <0.001 | 0.46 | <0.001 |
| Tcells.CD4.Activated Charoentong<br>CellRep.2017 PMID.28052254                                      | 0.49 | <0.001 | 0.48 | <0.001 |
| Tcells.CD8.Exhausted.vs.Naive.Metagene.3<br>Pauken Science.2016 PMID.27789795                       | 0.49 | <0.001 | 0.43 | <0.001 |
| IgG Rody BreastCancerResearch.2008<br>PMID.19272155                                                 | 0.48 | <0.001 | 0.44 | <0.001 |
| TLS.12genes.Chemokine Zhu<br>FrontImmunol.2017 PMID.28713385                                        | 0.48 | <0.001 | 0.45 | <0.001 |
| Tcells.Bcell.KEGG.hematopoietic.cell.lineage<br>GSEA.GP2 ProcNatIAcadSciUSA.2005<br>PMID.16199517   | 0.48 | <0.001 | 0.42 | <0.001 |
| Tcells.NK.Metagene Miller GenomeBiol.2013<br>PMID.23618380                                          | 0.48 | <0.001 | 0.44 | <0.001 |
| Monocytes.Dendritic.25genes Miller<br>GenomeBiol.2013 PMID.23618380                                 | 0.48 | <0.001 | 0.46 | <0.001 |
| Bcells ImSig.Nirmal<br>CancerImmunolRes.2018 PMID.30266715                                          | 0.48 | <0.001 | 0.43 | <0.001 |
| Tcells.CD4.Naive CIBERSORT<br>NatMethods.2015 PMID.25822800                                         | 0.47 | <0.001 | 0.41 | <0.001 |

|                                                                            |      |        |      |        |
|----------------------------------------------------------------------------|------|--------|------|--------|
| Bcells.Plasma.cells.Metagene Miller<br>GenomeBiol.2013 PMID.23618380       | 0.47 | <0.001 | 0.43 | <0.001 |
| Tcells.CD8.MCP Petitprez Nature.2020<br>PMID.31942077                      | 0.46 | <0.001 | 0.35 | <0.001 |
| Bcells.Plasmablast Dybaer JCO.2015<br>PMID.25800755                        | 0.46 | <0.001 | 0.39 | <0.001 |
| Dendritic.cells.Activated CIBERSORT<br>NatMethods.2015 PMID.25822800       | 0.46 | <0.001 | 0.44 | <0.001 |
| Bcells.Memory CIBERSORT<br>NatMethods.2015 PMID.25822800                   | 0.46 | <0.001 | 0.41 | <0.001 |
| Tcells.CD8.Memory.vs.Naive.Metagene.2<br>Pauken Science.2016 PMID.27789795 | 0.46 | <0.001 | 0.41 | <0.001 |
| MHC.11genes Forero<br>CancerImmunoRes.2016 PMID.26980599                   | 0.46 | <0.001 | 0.42 | <0.001 |
| Immune.HLA.D TCGA.BRCA.1198 JCI.2020<br>PMID.32573490                      | 0.46 | <0.001 | 0.38 | <0.001 |
| Tcells.CD8.Effector.Memory Charoentong<br>CellRep.2017 PMID.28052254       | 0.45 | <0.001 | 0.40 | <0.001 |
| Immune.CD19 TCGA.BRCA.1198 JCI.2020<br>PMID.32573490                       | 0.45 | <0.001 | 0.38 | <0.001 |
| Tcells.Regulatory Charoentong CellRep.2017<br>PMID.28052254                | 0.45 | <0.001 | 0.43 | <0.001 |
| Tcells.Activation Petitprez Nature.2020<br>PMID.31942077                   | 0.45 | <0.001 | 0.42 | <0.001 |
| Dendritic.cells.Activated Charoentong<br>CellRep.2017 PMID.28052254        | 0.45 | <0.001 | 0.44 | <0.001 |
| Bcells Bindea Immunity.2013<br>PMID.24138885                               | 0.44 | <0.001 | 0.37 | <0.001 |
| Bcells.Naive CIBERSORT NatMethods.2015<br>PMID.25822800                    | 0.44 | <0.001 | 0.39 | <0.001 |
| PD1.Signaling.Reactome GSEA<br>ProcNatAcadSciUSA.2005 PMID.16199517        | 0.44 | <0.001 | 0.41 | <0.001 |
| Bcells.ImmuneProfiles.Mouse.Human Shay<br>PNAS.2013 PMID.23382184          | 0.43 | <0.001 | 0.34 | <0.001 |
| Immune.HLA.A.F TCGA.BRCA.1198<br>JCI.2020 PMID.32573490                    | 0.43 | <0.001 | 0.41 | <0.001 |
| Bcells.Activated Charoentong CellRep.2017<br>PMID.28052254                 | 0.43 | <0.001 | 0.36 | <0.001 |
| Macrophages ImSig.Nirmal<br>CancerImmunoRes.2018 PMID.30266715             | 0.43 | <0.001 | 0.46 | <0.001 |
| Monocytes.Dendritic.cell.Metagene Miller<br>GenomeBiol.2013 PMID.23618380  | 0.43 | <0.001 | 0.34 | <0.001 |
| MHC.I Rody BreastCancerResearch.2008<br>PMID.19272155                      | 0.42 | <0.001 | 0.35 | <0.001 |
| Neutrophils.Activated.Lung Janiszewska<br>NatCellBiol.2019 PMID.31263265   | 0.42 | <0.001 | 0.36 | <0.001 |
| MHC.I.CoreGenes Lauss NatCommun.2017<br>PMID29170503                       | 0.41 | <0.001 | 0.38 | <0.001 |
| Bcells Garber<br>CellMolGastroenterolHepatol.2017<br>PMID.28508029         | 0.41 | <0.001 | 0.38 | <0.001 |
| NK.MCP Helmink Nature.2020<br>PMID.31942077                                | 0.41 | <0.001 | 0.29 | <0.001 |
| Monocytes CIBERSORT NatMethods.2015<br>PMID.25822800                       | 0.41 | <0.001 | 0.45 | <0.001 |



|                                                                                               |      |        |      |        |
|-----------------------------------------------------------------------------------------------|------|--------|------|--------|
| HCK Rody BreastCancerResearch.2008<br>PMID.19272155                                           | 0.41 | <0.001 | 0.43 | <0.001 |
| TLS.Known.Markers Cabrita Nature.2020<br>PMID.31942071                                        | 0.4  | <0.001 | 0.36 | <0.001 |
| Monocytes ImSig.Nirmal<br>CancerImmunoRes.2018 PMID.30266715                                  | 0.4  | <0.001 | 0.35 | <0.001 |
| MDSC.Neutrophil Youn LeukocBiol.2012<br>PMID.21954284                                         | 0.39 | <0.001 | 0.36 | <0.001 |
| Macrophages.M0 CIBERSORT<br>NatMethods.2015 PMID.25822800                                     | 0.39 | <0.001 | 0.44 | <0.001 |
| TLS.Hallmark Cabrita Nature.2020<br>PMID.31942071                                             | 0.37 | <0.001 | 0.30 | <0.001 |
| Tcells.ImmuneProfiles.Mouse.Human Shay<br>PNAS.2013 PMID.23382184                             | 0.37 | <0.001 | 0.34 | <0.001 |
| Tcells.Central.Memory Bindea Immunity.2013<br>PMID.24138885                                   | 0.37 | <0.001 | 0.26 | <0.001 |
| Neutrophils CIBERSORT NatMethods.2015<br>PMID.25822800                                        | 0.37 | <0.001 | 0.36 | <0.001 |
| Bcells.Tcells.Cooperation Hollern Cell.2019<br>PMID.31730857                                  | 0.35 | <0.001 | 0.28 | <0.001 |
| Immune.GIMAP.IL16 TCGA.BRCA.1198<br>JCI.2020 PMID.32573490                                    | 0.35 | <0.001 | 0.32 | <0.001 |
| Tcells.CD8.Exhausted.Anti.PDL1.vs.Control.<br>Metagene.1 Pauken Science.2016<br>PMID.27789795 | 0.35 | <0.001 | 0.39 | <0.001 |
| IFNg.Module11 Gatza<br>ProcNatlAcadSciUSA.2010 PMID.20335537                                  | 0.35 | <0.001 | 0.36 | <0.001 |
| IFN.Cluster.GSEA.GP11 Fan<br>BMCMedGenomics.2011 PMID.21214954                                | 0.35 | <0.001 | 0.37 | <0.001 |
| Bcells.IL10.Minus Lin JImmunol.2014<br>PMID.25080484                                          | 0.33 | <0.001 | 0.27 | <0.001 |
| Monocytes Charoentong CellRep.2017<br>PMID.28052254                                           | 0.33 | <0.001 | 0.27 | <0.001 |
| Dendritic.cells.Resting CIBERSORT<br>NatMethods.2015 PMID.25822800                            | 0.33 | <0.001 | 0.32 | <0.001 |
| Eosinophils CIBERSORT NatMethods.2015<br>PMID.25822800                                        | 0.33 | <0.001 | 0.31 | <0.001 |
| TLS.9genes Cabrita Nature.2020<br>PMID.31942071                                               | 0.32 | <0.001 | 0.24 | <0.001 |
| Bcells.Extended Garber<br>CellMolGastroenterolHepatol.2017<br>PMID.28508029                   | 0.31 | <0.001 | 0.29 | <0.001 |
| Macrophages Bindea Immunity.2013<br>PMID.24138885                                             | 0.31 | <0.001 | 0.31 | <0.001 |
| Tcells.Gamma.Delta Bindea Immunity.2013<br>PMID.24138885                                      | 0.31 | <0.001 | 0.26 | <0.001 |
| Tcells.Gamma.Delta TCGA Immunity.2018<br>PMID.29628290                                        | 0.31 | <0.001 | 0.26 | <0.001 |
| Tcells.CD8.Exhausted.vs.AntiPDL1.2 Pauken<br>Science.2016 PMID.27789795                       | 0.31 | <0.001 | 0.28 | <0.001 |
| Tcells.Follicular.Helper Bindea<br>Immunity.2013 PMID.24138885                                | 0.3  | <0.001 | 0.26 | <0.001 |
| Tcells.Follicular.Helper TCGA Immunity.2018<br>PMID.29628290                                  | 0.3  | <0.001 | 0.26 | <0.001 |

|                                                                           |      |        |      |        |
|---------------------------------------------------------------------------|------|--------|------|--------|
| Macrophages.M2 CIBERSORT<br>NatMethods.2015 PMID.25822800                 | 0.3  | <0.001 | 0.27 | <0.001 |
| Bcells.Centrocyte Dybaer JCO.2015<br>PMID.25800755                        | 0.28 | <0.001 | 0.25 | <0.001 |
| MDSC.Tumor.Macrophages Schlecker<br>JImmunol.2012 PMID.23152559           | 0.28 | <0.001 | 0.30 | <0.001 |
| Bcells.Memory Dybaer JCO.2015<br>PMID.25800755                            | 0.28 | <0.001 | 0.27 | <0.001 |
| IFNa.Module10 Gatza<br>ProcNatlAcadSciUSA.2010 PMID.20335537              | 0.28 | <0.001 | 0.33 | <0.001 |
| Granulocytes.ImmuneProfiles.Mouse.Human<br>Shay PNAS.2013 PMID.23382184   | 0.28 | <0.001 | 0.28 | <0.001 |
| Dendritic.cells Bindea Immunity.2013<br>PMID.24138885                     | 0.26 | <0.001 | 0.26 | <0.001 |
| IFN.Pathway ImSig.Nirmal<br>CancerImmunolRes.2018 PMID.30266715           | 0.26 | <0.001 | 0.29 | <0.001 |
| Tcells.CD8.Exhausted.vs.Naive.2 Pauken<br>Science.2016 PMID.27789795      | 0.25 | 0.001  | 0.23 | 0.001  |
| Influenza.11genes Khatri Immunity.2015<br>PMID.26682989                   | 0.25 | <0.001 | 0.26 | <0.001 |
| Immune.14 Perez JCO.2015 PMID.2560586                                     | 0.24 | <0.001 | 0.23 | 0.001  |
| Macrophages.M2 Ghassabeh Blood.2006<br>PMID.16556895                      | 0.23 | 0.001  | 0.22 | 0.001  |
| CD68.Cluster Iglesia CCR.2014<br>PMID.24916698                            | 0.23 | 0.001  | 0.21 | 0.002  |
| Proliferation.Pathway ImSig.Nirmal<br>CancerImmunolRes.2018 PMID.30266715 | 0.23 | 0.003  | 0.22 | 0.001  |
| Tcells.CD8.Effector.vs.Naive.2 Pauken<br>Science.2016 PMID.27789795       | 0.23 | 0.003  | 0.22 | 0.001  |
| Tcells.CD4.Effector.Memory Charoentong<br>CellRep.2017 PMID.28052254      | 0.23 | <0.001 | 0.25 | <0.001 |
| Mast.cells.Resting CIBERSORT<br>NatMethods.2015 PMID.25822800             | 0.23 | <0.001 | 0.18 | 0.01   |
| Mast.cell Charoentong CellRep.2017<br>PMID.28052254                       | 0.22 | 0.001  | 0.23 | 0.001  |
| Tcells.Regulatory.cell.2gene Petitprez<br>Nature.2020 PMID.31942077       | 0.22 | 0.001  | 0.17 | 0.01   |
| Neutrophils ImSig.Nirmal<br>CancerImmunolRes.2018 PMID.30266715           | 0.22 | <0.001 | 0.27 | <0.001 |
| Denditic.cells.ImmuneProfiles.Mouse.Human<br>Shay PNAS.2013 PMID.23382184 | 0.21 | 0.003  | 0.24 | <0.001 |
| Bcells.Centroblast Dybaer JCO.2015<br>PMID.25800755                       | 0.21 | 0.004  | 0.16 | 0.02   |
| Tcells.Follicular.Helper Charoentong<br>CellRep.2017 PMID.28052254        | 0.2  | 0.001  | 0.21 | 0.002  |
| MDSC.Tumor Schlecker JImmunol.2012<br>PMID.23152559                       | 0.2  | 0.001  | 0.22 | 0.001  |
| Serum.Response.Up TCGA Immunity.2018<br>PMID.29628290                     | 0.2  | 0.001  | 0.12 | 0.07   |
| Neutrophils Bindea Immunity.2013<br>PMID.24138885                         | 0.2  | 0.013  | 0.23 | 0.001  |
| Tcells.Th2 Charoentong CellRep.2017<br>PMID.28052254                      | 0.18 | <0.001 | 0.17 | 0.01   |

|                                                                     |                    |                |       |        |
|---------------------------------------------------------------------|--------------------|----------------|-------|--------|
| Bcells.Naive Dybaer JCO.2015<br>PMID.25800755                       | 0.17               | 0.002          | 0.14  | 0.04   |
| NK.ImmuneProfiles.Mouse.Human Shay<br>PNAS.2013 PMID.23382184       | 0.17               | 0.002          | 0.17  | 0.01   |
| Wound.Healing Chang PlosBiol.2004<br>PMID.14737219                  | 0.17               | 0.003          | 0.15  | 0.03   |
| MHC.24genes Forero<br>CancerImmunoRes.2016 PMID.26980599            | 0.17               | 0.008          | 0.15  | 0.03   |
| Mast.cells.Activated CIBERSORT<br>NatMethods.2015 PMID.25822800     | 0.17               | 0.009          | 0.13  | 0.07   |
| NK Charoentong CellRep.2017<br>PMID.28052254                        | 0.17               | 0.01           | 0.17  | 0.01   |
| NK.Tcell Charoentong CellRep.2017<br>PMID.28052254                  | 0.17               | 0.01           | 0.22  | 0.001  |
| IFN.Cluster Fan BMCMedGenomics.2011<br>PMID.21214954                | 0.17               | 0.02           | 0.20  | 0.003  |
| Immune.IFN TCGA.BRCA.1198 JCI.2020<br>PMID.32573490                 | 0.17               | 0.03           | 0.20  | 0.003  |
| Tcells.CD8 Bindea Immunity.2013<br>PMID.24138885                    | 0.17               | 0.03           | 0.05  | 0.47   |
| IFN.3.ImmLandscape Wolf PlosOne.2014<br>PMID.24516633               | 0.17               | 0.04           | 0.20  | 0.002  |
| IFN.Score.module3 TCGA Immunity.2018<br>PMID.29628290               | 0.17               | 0.04           | 0.20  | 0.002  |
| Eosinophils Charoentong CellRep.2017<br>PMID.28052254               | 0.15               | 0.03           | 0.17  | 0.014  |
| Tcells.Thelper Bindea Immunity.2013<br>PMID.24138885                | 0.14               | 0.012          | 0.07  | 0.29   |
| Tcells.Th17.cells Charoentong CellRep.2017<br>PMID.28052254         | 0.11               | 0.03           | 0.08  | 0.22   |
| Dendritic.cells.Immature. Charoentong<br>CellRep.2017 PMID.28052254 | 0.1                | 0.04           | 0.14  | 0.05   |
| Mast.cells Bindea Immunity.2013<br>PMID.24138885                    | -0.14              | 0.04           | -0.10 | 0.14   |
| Eosinophils Bindea Immunity.2013<br>PMID.24138885                   | -0.16              | 0.03           | -0.07 | 0.34   |
| Immunosuppression Petitprez Nature.2020<br>PMID.31942077            | -0.17              | 0.01           | -0.11 | 0.10   |
| Tcells.Th17.cells Bindea Immunity.2013<br>PMID.24138885             | -0.18              | 0.04           | -0.16 | 0.02   |
| TGFB.score TCGA Immunity.2018<br>PMID.29628290                      | -0.26              | <0.001         | -0.19 | 0.006  |
| TLS.High.In.No.Response Helmink<br>Nature.2020 PMID.31942075        | -0.29              | <0.001         | -0.24 | <0.001 |
| <b>PAMELA</b>                                                       | <b>Coefficient</b> | <b>p-value</b> |       |        |
| IFN.5.ImmLandscape Wolf PlosOne.2014<br>PMID.24516633               | 0.71               | <0.001         | 0.64  | <0.001 |
| Stromal.Inflammation Heng JPathol.2017<br>PMID.27861902             | 0.7                | <0.001         | 0.63  | <0.001 |
| TLS.High.In.Response.MCP Helmink<br>Nature.2020 PMID.31942075       | 0.65               | <0.001         | 0.58  | <0.001 |
| Tcells.Bcell.Cluster Fan<br>BMCMedGenomics.2011 PMID.21214954       | 0.68               | <0.001         | 0.62  | <0.001 |

|                                                                                       |      |        |      |        |
|---------------------------------------------------------------------------------------|------|--------|------|--------|
| Tcells.CD4.Memory.Activated CIBERSORT NatMethods.2015 PMID.25822800                   | 0.69 | <0.001 | 0.62 | <0.001 |
| Immune.Active Hollern Cell.2019 PMID.31730857                                         | 0.67 | <0.001 | 0.62 | <0.001 |
| Tcells.Cluster Iglesia CCR.2014 PMID.24916698                                         | 0.66 | <0.001 | 0.64 | <0.001 |
| Tcells.CD8 CIBERSORT NatMethods.2015 PMID.25822800                                    | 0.65 | <0.001 | 0.64 | <0.001 |
| CD8.Cluster Iglesia CCR.2014 PMID.24916698                                            | 0.65 | <0.001 | 0.62 | <0.001 |
| Cytotoxic.cells Bindea Immunity.2013 PMID.24138885                                    | 0.66 | <0.001 | 0.62 | <0.001 |
| Immune.CD8.GZMK TCGA.BRCA.1198 JCI.2020 PMID.32573490                                 | 0.65 | <0.001 | 0.62 | <0.001 |
| Macrophages.M1 CIBERSORT NatMethods.2015 PMID.25822800                                | 0.68 | <0.001 | 0.62 | <0.001 |
| Tcells ImSig.Nirmal CancerImmunoRes.2018 PMID.30266715                                | 0.63 | <0.001 | 0.63 | <0.001 |
| NK.Activated CIBERSORT NatMethods.2015 PMID.25822800                                  | 0.63 | <0.001 | 0.59 | <0.001 |
| Tcells.Resident.Memory.Single.cell Savas NatMed.2018 PMID.29942092                    | 0.64 | <0.001 | 0.60 | <0.001 |
| Immune.Hot.vs.Cold.CD8 Cabrita Nature.2020 PMID.31942071                              | 0.66 | <0.001 | 0.64 | <0.001 |
| Tcells.Follicular.Helper CIBERSORT NatMethods.2015 PMID.25822800                      | 0.65 | <0.001 | 0.61 | <0.001 |
| Immune.87 Perez JCO.2015 PMID.2560586                                                 | 0.65 | <0.001 | 0.62 | <0.001 |
| Immune.Cell.Content Verhaak NatCommun.2013 PMID.24113773                              | 0.64 | <0.001 | 0.63 | <0.001 |
| Tcells.Gamma.Delta CIBERSORT NatMethods.2015 PMID.25822800                            | 0.61 | <0.001 | 0.54 | <0.001 |
| LCK Rody BreastCancerResearch.2008 PMID.19272155                                      | 0.64 | <0.001 | 0.59 | <0.001 |
| Tcells.CD4.Memory.Resting CIBERSORT NatMethods.2015 PMID.25822800                     | 0.63 | <0.001 | 0.63 | <0.001 |
| MCD3.CD8 Fan BMCMedGenomics.2011 PMID.21214954                                        | 0.62 | <0.001 | 0.54 | <0.001 |
| Tcells.MCP Petitprez Nature.2020 PMID.31942077                                        | 0.66 | <0.001 | 0.57 | <0.001 |
| Tcells.CD8.Activated Charoentong CellRep.2017 PMID.28052254                           | 0.65 | <0.001 | 0.57 | <0.001 |
| TLS.Tumors.w.TLS.and.CD8.vs.CD8.alone Cabrita Nature.2020 PMID.31942071               | 0.62 | <0.001 | 0.59 | <0.001 |
| Tcells Bindea Immunity.2013 PMID.24138885                                             | 0.64 | <0.001 | 0.62 | <0.001 |
| Tcells.NK.51genes Miller GenomeBiol.2013 PMID.23618380                                | 0.63 | <0.001 | 0.59 | <0.001 |
| MERCK.Immune.Signature Cristescu Science.2018 PMID.30309915                           | 0.68 | <0.001 | 0.68 | <0.001 |
| NK.Resting CIBERSORT NatMethods.2015 PMID.25822800                                    | 0.62 | <0.001 | 0.55 | <0.001 |
| Tcells.Bcells.Lymphocyte.Infiltration Calabro BreastCancerResTreat.2009 PMID.18592372 | 0.63 | <0.001 | 0.57 | <0.001 |

|                                                                                                     |      |        |      |        |
|-----------------------------------------------------------------------------------------------------|------|--------|------|--------|
| Lymphocyte.Infiltration.Expression.Score<br>TCGA Immunity.2018 PMID.29628290                        | 0.63 | <0.001 | 0.57 | <0.001 |
| Tcells.NK.Metagene Miller GenomeBiol.2013<br>PMID.23618380                                          | 0.61 | <0.001 | 0.56 | <0.001 |
| Immune.CTLA4.CXCL.FOXP3<br>TCGA.BRCA.1198 JCI.2020<br>PMID.32573490.                                | 0.71 | <0.001 | 0.67 | <0.001 |
| NK.CD56dim Bindea Immunity.2013<br>PMID.24138885                                                    | 0.64 | <0.001 | 0.61 | <0.001 |
| CTLA4.Pathway GSEA.BIOCARTA<br>ProcNatlAcadSciUSA.2005 PMID.16199517                                | 0.65 | <0.001 | 0.61 | <0.001 |
| Dendritic.cells.Activated Bindea<br>Immunity.2013 PMID.24138885                                     | 0.65 | <0.001 | 0.65 | <0.001 |
| Immune.CD4.CD53.CD84.BTK<br>TCGA.BRCA.1198 JCI.2020 PMID.32573490                                   | 0.62 | <0.001 | 0.62 | <0.001 |
| Cytotoxic.Lymphocytes.MCP Petitprez<br>Nature.2020 PMID.31942077                                    | 0.6  | <0.001 | 0.57 | <0.001 |
| TLS.12genes.Chemokine Zhu<br>FrontImmunol.2017 PMID.28713385                                        | 0.66 | <0.001 | 0.64 | <0.001 |
| Tcells.Regulatory.Tregs CIBERSORT<br>NatMethods.2015 PMID.25822800                                  | 0.61 | <0.001 | 0.57 | <0.001 |
| IGG.Cluster Fan BMCMedGenomics.2011<br>PMID.21214954                                                | 0.62 | <0.001 | 0.52 | <0.001 |
| Macrophages.Th1.Cluster Iglesia CCR.2014<br>PMID.24916698                                           | 0.63 | <0.001 | 0.62 | <0.001 |
| Tcells.CD4.Naive CIBERSORT<br>NatMethods.2015 PMID.25822800                                         | 0.59 | <0.001 | 0.59 | <0.001 |
| Immune.Suppression Kardos JCIInsight.2016<br>PMID.27699256                                          | 0.67 | <0.001 | 0.64 | <0.001 |
| Immune1 TCGA.BRCA.1198 JCI.2020<br>PMID.32573490                                                    | 0.61 | <0.001 | 0.54 | <0.001 |
| Tcells.CD4.Activated Charoentong<br>CellRep.2017 PMID.28052254                                      | 0.64 | <0.001 | 0.60 | <0.001 |
| Macrophages.Monocytes.CSF1.Response<br>Beck CCR.2009 PMID.19188147                                  | 0.62 | <0.001 | 0.60 | <0.001 |
| CSF1.Response TCGA Immunity.2018<br>PMID.29628290                                                   | 0.62 | <0.001 | 0.60 | <0.001 |
| Tcells.Bcell.KEGG.hematopoietic.cell.lineage<br>GSEA.GP2 ProcNatlAcadSciUSA.2005<br>PMID.16199517   | 0.62 | <0.001 | 0.59 | <0.001 |
| STAT1 Rody BreastCancerResearch.2008<br>PMID.19272155                                               | 0.68 | <0.001 | 0.66 | <0.001 |
| CD274.Single.Gene Hollern Cell.2019<br>PMID.31730857                                                | 0.65 | <0.001 | 0.64 | <0.001 |
| Bcells.IL10.Plus Lin JImmunol.2014<br>PMID.25080484                                                 | 0.58 | <0.001 | 0.51 | <0.001 |
| Tcells.CD8.Effector.Memory Charoentong<br>CellRep.2017 PMID.28052254                                | 0.59 | <0.001 | 0.58 | <0.001 |
| MHC.II Rody BreastCancerResearch.2008<br>PMID.19272155                                              | 0.65 | <0.001 | 0.63 | <0.001 |
| Tcells.CD8.Exhausted.at.day.8.post.Imm.vs.<br>Naive.Metagene.1 Pauken Science.2016<br>PMID.27789795 | 0.62 | <0.001 | 0.56 | <0.001 |
| Dendritic.cells.Activated CIBERSORT<br>NatMethods.2015 PMID.25822800                                | 0.64 | <0.001 | 0.61 | <0.001 |

|                                                                               |      |        |      |        |
|-------------------------------------------------------------------------------|------|--------|------|--------|
| Cytolytic.Activity Rooney Cell.2015<br>PMID.25594174                          | 0.61 | <0.001 | 0.59 | <0.001 |
| Tcells.Th1.cells Bindea Immunity.2013<br>PMID.24138885                        | 0.57 | <0.001 | 0.54 | <0.001 |
| Tcells.CD8.Memory.vs.Naive.1 Pauken<br>Science.2016 PMID.27789795             | 0.64 | <0.001 | 0.60 | <0.001 |
| Tcells.CD8.Memory.vs.Naive.Metagene.1<br>Pauken Science.2016 PMID.27789795    | 0.64 | <0.001 | 0.60 | <0.001 |
| Bcells.Immature Charoentong CellRep.2017<br>PMID.28052254                     | 0.57 | <0.001 | 0.56 | <0.001 |
| Immune.GIMAP.IL16 TCGA.BRCA.1198<br>JCI.2020 PMID.32573490                    | 0.51 | <0.001 | 0.51 | <0.001 |
| TLS.Known.Markers Cabrita Nature.2020<br>PMID.31942071                        | 0.58 | <0.001 | 0.53 | <0.001 |
| Immune.HLA.A.F TCGA.BRCA.1198<br>JCI.2020 PMID.32573490                       | 0.62 | <0.001 | 0.60 | <0.001 |
| NK ImSig.Nirmal CancerImmunoRes.2018<br>PMID.30266715                         | 0.55 | <0.001 | 0.52 | <0.001 |
| Tcells.CD8.Exhausted.vs.Naive.Metagene.3<br>Pauken Science.2016 PMID.27789795 | 0.61 | <0.001 | 0.58 | <0.001 |
| Bcells.Memory CIBERSORT<br>NatMethods.2015 PMID.25822800                      | 0.57 | <0.001 | 0.47 | <0.001 |
| Tcells.CD8.Memory.vs.Naive.Metagene.3<br>Pauken Science.2016 PMID.27789795    | 0.61 | <0.001 | 0.55 | <0.001 |
| Tcells.CD8.MCP Petitprez Nature.2020<br>PMID.31942077                         | 0.65 | <0.001 | 0.66 | <0.001 |
| Plasma.cells CIBERSORT NatMethods.2015<br>PMID.25822800                       | 0.55 | <0.001 | 0.47 | <0.001 |
| Monocytes.Dendritic.25genes Miller<br>GenomeBiol.2013 PMID.23618380           | 0.6  | <0.001 | 0.59 | <0.001 |
| Bcells ImSig.Nirmal<br>CancerImmunoRes.2018 PMID.30266715                     | 0.54 | <0.001 | 0.47 | <0.001 |
| TLS.Hallmark Cabrita Nature.2020<br>PMID.31942071                             | 0.54 | <0.001 | 0.48 | <0.001 |
| MDSC Charoentong CellRep.2017<br>PMID.28052254                                | 0.57 | <0.001 | 0.50 | <0.001 |
| HCK Rody BreastCancerResearch.2008<br>PMID.19272155                           | 0.61 | <0.001 | 0.56 | <0.001 |
| Bcells.Naive CIBERSORT NatMethods.2015<br>PMID.25822800                       | 0.53 | <0.001 | 0.44 | <0.001 |
| Macrophages.M0 CIBERSORT<br>NatMethods.2015 PMID.25822800                     | 0.62 | <0.001 | 0.60 | <0.001 |
| CTLA4.Single.Gene Hollern Cell.2019<br>PMID.31730857                          | 0.66 | <0.001 | 0.63 | <0.001 |
| Macrophages ImSig.Nirmal<br>CancerImmunoRes.2018 PMID.30266715                | 0.63 | <0.001 | 0.63 | <0.001 |
| Bcells.Plasma.cells.52genes Miller<br>GenomeBiol.2013 PMID.23618380           | 0.57 | <0.001 | 0.49 | <0.001 |
| Tcells.Th1.cells Charoentong CellRep.2017<br>PMID.28052254                    | 0.57 | <0.001 | 0.55 | <0.001 |
| Bcells.Cluster Iglesia CCR.2014<br>PMID.24916698                              | 0.53 | <0.001 | 0.44 | <0.001 |
| Tcells.Regulatory Charoentong CellRep.2017<br>PMID.28052254                   | 0.55 | <0.001 | 0.50 | <0.001 |

|                                                                                               |      |        |      |        |
|-----------------------------------------------------------------------------------------------|------|--------|------|--------|
| Ig TCGA.BRCA.1198 Cell.2015<br>PMID.26451490                                                  | 0.55 | <0.001 | 0.49 | <0.001 |
| Monocytes ImSig.Nirmal<br>CancerImmunoRes.2018 PMID.30266715                                  | 0.6  | <0.001 | 0.57 | <0.001 |
| Tcells.CD8.Exhausted.vs.Naive.Metagene.1<br>Pauken Science.2016 PMID.27789795                 | 0.56 | <0.001 | 0.53 | <0.001 |
| Bcells.Tcells.Cooperation Hollern Cell.2019<br>PMID.31730857                                  | 0.5  | <0.001 | 0.40 | <0.001 |
| Bcells.Activated Charoentong CellRep.2017<br>PMID.28052254                                    | 0.52 | <0.001 | 0.41 | <0.001 |
| Bcells Bindea Immunity.2013<br>PMID.24138885                                                  | 0.5  | <0.001 | 0.42 | <0.001 |
| Macrophages.M2 CIBERSORT<br>NatMethods.2015 PMID.25822800                                     | 0.54 | <0.001 | 0.61 | <0.001 |
| Tcells.CD8.Memory.vs.Naive.Metagene.2<br>Pauken Science.2016 PMID.27789795                    | 0.54 | <0.001 | 0.56 | <0.001 |
| MHC.I Rody BreastCancerResearch.2008<br>PMID.19272155                                         | 0.56 | <0.001 | 0.55 | <0.001 |
| Immune.HLA.D TCGA.BRCA.1198 JCI.2020<br>PMID.32573490                                         | 0.55 | <0.001 | 0.50 | <0.001 |
| Dendritic.cells.Activated Charoentong<br>CellRep.2017 PMID.28052254                           | 0.54 | <0.001 | 0.52 | <0.001 |
| PD1.Signaling.Reactome GSEA<br>ProcNatlAcadSciUSA.2005 PMID.16199517                          | 0.5  | <0.001 | 0.50 | <0.001 |
| Dendritic.cells.Resting CIBERSORT<br>NatMethods.2015 PMID.25822800                            | 0.55 | <0.001 | 0.55 | <0.001 |
| TLS.9genes Cabrita Nature.2020<br>PMID.31942071                                               | 0.45 | <0.001 | 0.42 | <0.001 |
| MHC.I.CoreGenes Lauss NatCommun.2017<br>PMID29170503                                          | 0.57 | <0.001 | 0.59 | <0.001 |
| Tcells.ImmuneProfiles.Mouse.Human Shay<br>PNAS.2013 PMID.23382184                             | 0.39 | <0.001 | 0.43 | <0.001 |
| Bcells.Plasma.cells.Metagene Miller<br>GenomeBiol.2013 PMID.23618380                          | 0.52 | <0.001 | 0.44 | <0.001 |
| Immune.CD19 TCGA.BRCA.1198 JCI.2020<br>PMID.32573490                                          | 0.5  | <0.001 | 0.43 | <0.001 |
| Bcells Garber<br>CellMolGastroenterolHepatol.2017<br>PMID.28508029                            | 0.51 | <0.001 | 0.45 | <0.001 |
| MDSC.Neutrophil Youn LeukocBiol.2012<br>PMID.21954284                                         | 0.55 | <0.001 | 0.54 | <0.001 |
| MHC.11genes Forero<br>CancerImmunoRes.2016 PMID.26980599                                      | 0.47 | <0.001 | 0.39 | <0.001 |
| Monocytes CIBERSORT NatMethods.2015<br>PMID.25822800                                          | 0.55 | <0.001 | 0.51 | <0.001 |
| Bcells.Plasmablast Dybaer JCO.2015<br>PMID.25800755                                           | 0.47 | <0.001 | 0.40 | <0.001 |
| Tcells.CD8.Exhausted.Anti.PDL1.vs.Control.<br>Metagene.1 Pauken Science.2016<br>PMID.27789795 | 0.52 | <0.001 | 0.53 | <0.001 |
| IFN.Cluster.GSEA.GP11 Fan<br>BMCMedGenomics.2011 PMID.21214954                                | 0.53 | <0.001 | 0.48 | <0.001 |
| Plasma.cells ImSig.Nirmal<br>CancerImmunoRes.2018 PMID.30266715                               | 0.52 | <0.001 | 0.45 | <0.001 |

|                                                                             |       |        |       |        |
|-----------------------------------------------------------------------------|-------|--------|-------|--------|
| IFNg.Module11 Gatza<br>ProcNatI AcadSciUSA.2010 PMID.20335537               | 0.51  | <0.001 | 0.49  | <0.001 |
| Monocytes.Dendritic.cell.Metagene Miller<br>GenomeBiol.2013 PMID.23618380   | 0.53  | <0.001 | 0.59  | <0.001 |
| Tcells.Activation Petitprez Nature.2020<br>PMID.31942077                    | 0.59  | <0.001 | 0.57  | <0.001 |
| Eosinophils CIBERSORT NatMethods.2015<br>PMID.25822800                      | 0.5   | <0.001 | 0.42  | <0.001 |
| IgG Rody BreastCancerResearch.2008<br>PMID.19272155                         | 0.51  | <0.001 | 0.41  | <0.001 |
| Tcells.Survival.2gene Petitprez Nature.2020<br>PMID.31942077                | 0.5   | <0.001 | 0.49  | <0.001 |
| Immune.14 Perez JCO.2015 PMID.2560586                                       | 0.45  | <0.001 | 0.45  | <0.001 |
| Dendritic.cells Bindea Immunity.2013<br>PMID.24138885                       | 0.48  | <0.001 | 0.46  | <0.001 |
| Bcells.ImmuneProfiles.Mouse.Human Shay<br>PNAS.2013 PMID.23382184           | 0.38  | <0.001 | 0.39  | <0.001 |
| Tcells.Th17.cells Charoentong CellRep.2017<br>PMID.28052254                 | 0.44  | <0.001 | 0.33  | <0.001 |
| PDCD1.Single.Gene Pare AnnOncol.2019<br>PMID.30165419                       | 0.52  | <0.001 | 0.45  | <0.001 |
| NK.ImmuneProfiles.Mouse.Human Shay<br>PNAS.2013 PMID.23382184               | 0.39  | <0.001 | 0.40  | <0.001 |
| IFNa.Module10 Gatza<br>ProcNatI AcadSciUSA.2010 PMID.20335537               | 0.44  | <0.001 | 0.39  | <0.001 |
| Mast.cells.Resting CIBERSORT<br>NatMethods.2015 PMID.25822800               | 0.38  | <0.001 | 0.39  | <0.001 |
| Mast.cell Charoentong CellRep.2017<br>PMID.28052254                         | 0.42  | <0.001 | 0.38  | <0.001 |
| TLS.High.In.No.Response Helmink<br>Nature.2020 PMID.31942075                | -0.37 | <0.001 | -0.26 | <0.001 |
| Macrophages.M2 Ghassabeh Blood.2006<br>PMID.16556895                        | 0.43  | <0.001 | 0.40  | <0.001 |
| Neutrophils CIBERSORT NatMethods.2015<br>PMID.25822800                      | 0.41  | <0.001 | 0.39  | <0.001 |
| Granulocytes.ImmuneProfiles.Mouse.Human<br>Shay PNAS.2013 PMID.23382184     | 0.48  | <0.001 | 0.53  | <0.001 |
| Influenza.11genes Khatri Immunity.2015<br>PMID.26682989                     | 0.43  | <0.001 | 0.37  | <0.001 |
| MHC.24genes Forero<br>CancerImmunolRes.2016 PMID.26980599                   | 0.36  | <0.001 | 0.35  | <0.001 |
| IFN.Pathway ImSig.Nirmal<br>CancerImmunolRes.2018 PMID.30266715             | 0.42  | <0.001 | 0.34  | <0.001 |
| Bcells.Extended Garber<br>CellMolGastroenterolHepatol.2017<br>PMID.28508029 | 0.39  | <0.001 | 0.34  | <0.001 |
| Mast.cells.Activated CIBERSORT<br>NatMethods.2015 PMID.25822800             | 0.35  | <0.001 | 0.37  | <0.001 |
| Macrophages Bindea Immunity.2013<br>PMID.24138885                           | 0.47  | <0.001 | 0.48  | <0.001 |
| MDSC.Tumor.Macrophages Schlecker<br>JImmunol.2012 PMID.23152559             | 0.37  | <0.001 | 0.37  | <0.001 |
| Monocytes Charoentong CellRep.2017<br>PMID.28052254                         | 0.29  | <0.001 | 0.30  | 0.001  |



|                                                                        |       |        |       |        |
|------------------------------------------------------------------------|-------|--------|-------|--------|
| Tcells.CD4.Effector.Memory Charoentong CellRep.2017 PMID.28052254      | 0.41  | <0.001 | 0.36  | <0.001 |
| Neutrophils.Activated.Lung Janiszewska NatCellBiol.2019 PMID.31263265  | 0.33  | <0.001 | 0.40  | <0.001 |
| Tcells.Central.Memory Bindea Immunity.2013 PMID.24138885               | 0.29  | <0.001 | 0.26  | 0.003  |
| Tcells.Follicular.Helper Bindea Immunity.2013 PMID.24138885            | 0.34  | <0.001 | 0.36  | <0.001 |
| Tcells.Follicular.Helper TCGA Immunity.2018 PMID.29628290              | 0.34  | <0.001 | 0.36  | <0.001 |
| Neutrophils.Activated.Blood Janiszewska NatCellBiol.2019 PMID.31263265 | 0.33  | <0.001 | 0.28  | 0.002  |
| Neutrophils ImSig.Nirmal CancerImmunoRes.2018 PMID.30266715            | 0.38  | <0.001 | 0.38  | <0.001 |
| Bcells.Naive Dybaer JCO.2015 PMID.25800755                             | 0.28  | <0.001 | 0.23  | 0.008  |
| Tcells.CD4.Central.Memory Charoentong CellRep.2017 PMID.28052254       | 0.25  | <0.001 | 0.32  | <0.001 |
| Tcells.CD8.Exhausted.vs.AntiPDL1.2 Pauken Science.2016 PMID.27789795   | 0.29  | 0.001  | 0.23  | 0.008  |
| NK.MCP Helmink Nature.2020 PMID.31942077                               | 0.21  | 0.001  | 0.13  | 0.14   |
| TGFB.score TCGA Immunity.2018 PMID.29628290                            | -0.22 | 0.001  | -0.10 | 0.25   |
| Tcells.CD8 Bindea Immunity.2013 PMID.24138885                          | 0.24  | 0.001  | 0.19  | 0.03   |
| Tcells.Follicular.Helper Charoentong CellRep.2017 PMID.28052254        | 0.27  | 0.001  | 0.31  | <0.001 |
| Bcells.IL10.Minus Lin JImmunol.2014 PMID.25080484                      | 0.34  | 0.002  | 0.28  | 0.001  |
| Immune.IFN TCGA.BRCA.1198 JCI.2020 PMID.32573490                       | 0.28  | 0.002  | 0.23  | 0.01   |
| IFN.Cluster Fan BMCMedGenomics.2011 PMID.21214954                      | 0.27  | 0.003  | 0.24  | 0.007  |
| NK.CD56bright Bindea Immunity.2013 PMID.24138885                       | 0.26  | 0.003  | 0.21  | 0.02   |
| NK.Tcell Charoentong CellRep.2017 PMID.28052254                        | 0.36  | 0.003  | 0.37  | <0.001 |
| IFN.3.ImmLandscape Wolf PlosOne.2014 PMID.24516633                     | 0.27  | 0.004  | 0.25  | 0.004  |
| IFN.Score.module3 TCGA Immunity.2018 PMID.29628290                     | 0.27  | 0.004  | 0.25  | 0.004  |
| MDSC.Tumor Schlecker JImmunol.2012 PMID.23152559                       | 0.33  | 0.004  | 0.30  | 0.001  |
| Tcells.Regulatory.cell.2gene Petitprez Nature.2020 PMID.31942077       | 0.31  | 0.007  | 0.34  | <0.001 |
| Immunosuppression Petitprez Nature.2020 PMID.31942077                  | -0.23 | 0.009  | -0.14 | 0.13   |
| Bcells.Memory Dybaer JCO.2015 PMID.25800755                            | 0.23  | 0.01   | 0.20  | 0.02   |
| Tcells.Th2 Charoentong CellRep.2017 PMID.28052254                      | 0.21  | 0.01   | 0.22  | 0.01   |
| Tcells.CD8.Exhausted.vs.Naive.2 Pauken Science.2016 PMID.27789795      | 0.22  | 0.01   | 0.17  | 0.05   |

|                                                                                         |       |      |       |       |
|-----------------------------------------------------------------------------------------|-------|------|-------|-------|
| NK Charoentong CellRep.2017<br>PMID.28052254                                            | 0.25  | 0.01 | 0.24  | 0.006 |
| Bcells.Memory Charoentong CellRep.2017<br>PMID.28052254                                 | 0.22  | 0.02 | 0.16  | 0.08  |
| Neutrophils Bindea Immunity.2013<br>PMID.24138885                                       | 0.24  | 0.03 | 0.24  | 0.006 |
| IFN Rody BreastCancerResearch.2008<br>PMID.19272155                                     | 0.21  | 0.03 | 0.21  | 0.02  |
| Bcells.Centroblast Dybaer JCO.2015<br>PMID.25800755                                     | 0.19  | 0.03 | 0.12  | 0.20  |
| Tcells.Effector.Memory Bindea<br>Immunity.2013 PMID.24138885                            | 0.14  | 0.03 | 0.22  | 0.01  |
| Hematopoietic.Stem.cells.ImmuneProfiles.Mo<br>use.Human Shay PNAS.2013<br>PMID.23382184 | -0.14 | 0.04 | -0.17 | 0.06  |
| Proliferation.Pathway ImSig.Nirmal<br>CancerImmunolRes.2018 PMID.30266715               | 0.2   | 0.04 | 0.11  | 0.22  |
| CD103.Negative Broz CancerCell.2014<br>PMID.25446897                                    | 0.2   | 0.04 | 0.21  | 0.02  |
| Tcells.CD8.Effector.vs.Naive.2 Pauken<br>Science.2016 PMID.27789795                     | 0.19  | 0.04 | 0.09  | 0.32  |

Only the immune signatures significantly associated with TILs as continuous variables in each study are shown. Spearman's correlation coefficients and p-values (95% CI) are included. P-values are adjusted for multiple testing using a Benjamini & Hochberg method to control the False Discovery Rate.

**eTable 4. Association of Tumor-Infiltrating Lymphocytes (TILs) and Immune Gene Expression Signatures (iGES) With Pathologic Complete Response (pCR) in the Combined CALGB 40601 and PAMELA Data Set**

| All Signatures                                                          | OR   | Lower CI | Upper CI | p value | AIC    |
|-------------------------------------------------------------------------|------|----------|----------|---------|--------|
| Bcells.Plasma.cells.52genes Miller GenomeBiol.2013 PMID.23618380        | 1.93 | 1.51     | 2.51     | <0.001  | 453.15 |
| Ig TCGA.BRCA.1198 Cell.2015 PMID.26451490                               | 1.94 | 1.51     | 2.51     | <0.001  | 453.11 |
| Plasma.cells ImSig.Nirmal CancerImmunolRes.2018 PMID.30266715           | 2.01 | 1.57     | 2.63     | <0.001  | 450.06 |
| IgG Rody BreastCancerResearch.2008 PMID.19272155                        | 1.81 | 1.42     | 2.33     | <0.001  | 458.11 |
| Immune1 TCGA.BRCA.1198 JCI.2020 PMID.32573490                           | 1.77 | 1.40     | 2.27     | <0.001  | 459.16 |
| IGG.Cluster Fan BMCMedGenomics.2011 PMID.21214954                       | 1.64 | 1.30     | 2.09     | 0.001   | 464.74 |
| NK.CD56dim Bindea Immunity.2013 PMID.24138885                           | 1.65 | 1.31     | 2.12     | 0.001   | 464.57 |
| Bcells.Plasma.cells.Metagene Miller GenomeBiol.2013 PMID.23618380       | 1.65 | 1.30     | 2.11     | 0.001   | 464.76 |
| TLS.High.In.Response.MCP Helmink Nature.2020 PMID.31942075              | 1.64 | 1.30     | 2.10     | 0.001   | 465.05 |
| Immune.CTLA4.CXCL.FOXP3 TCGA.BRCA.1198 JCI.2020 PMID.32573490.          | 1.63 | 1.28     | 2.10     | 0.002   | 466.12 |
| CD274.Single.Gene Hollern Cell.2019 PMID.31730857                       | 1.55 | 1.23     | 1.98     | 0.005   | 468.41 |
| Bcells.Centroblast Dybkae JCO.2015 PMID.25800755                        | 1.55 | 1.23     | 1.98     | 0.005   | 468.37 |
| Dendritic.cells.ImmuneProfiles.Mouse.Human Shay PNAS.2013 PMID.23382184 | 1.48 | 1.18     | 1.88     | 0.02    | 471.30 |
| TILs 40                                                                 | 2.29 | 1.40     | 3.77     | 0.02    | 471.68 |
| TILs                                                                    | 1.01 | 1.01     | 1.02     | 0.02    | 472.23 |
| Macrophages.M1 CIBERSORT NatMethods.2015 PMID.25822800                  | 1.47 | 1.16     | 1.86     | 0.02    | 472.10 |
| STAT1 Rody BreastCancerResearch.2008 PMID.19272155                      | 1.46 | 1.16     | 1.86     | 0.02    | 472.11 |
| IFN.5.ImmLandscape Wolf PlosOne.2014 PMID.24516633                      | 1.44 | 1.15     | 1.83     | 0.02    | 472.63 |
| Bcells.Plasmablast Dybaer JCO.2015 PMID.25800755                        | 1.43 | 1.14     | 1.80     | 0.02    | 472.66 |
| Tcells.CD4.Memory.Activated CIBERSORT NatMethods.2015 PMID.25822800     | 1.44 | 1.14     | 1.82     | 0.02    | 472.81 |
| Stromal.Inflammation Heng JPathol.2017 PMID.27861902                    | 1.43 | 1.14     | 1.80     | 0.03    | 473.18 |
| Bcells.Cluster Iglesias CCR.2014 PMID.24916698                          | 1.40 | 1.12     | 1.77     | 0.03    | 473.77 |

|                                                                         |      |      |      |      |        |
|-------------------------------------------------------------------------|------|------|------|------|--------|
| Dendritic.cells.Activated Bindea Immunity.2013 PMID.24138885            | 1.41 | 1.12 | 1.79 | 0.03 | 473.91 |
| Immune.Suppression Kardos JCIInsight.2016 PMID.27699256                 | 1.41 | 1.12 | 1.79 | 0.03 | 474.03 |
| Proliferation.Pathway ImSig.Nirmal CancerImmunolRes.2018 PMID.30266715  | 1.41 | 1.12 | 1.78 | 0.03 | 473.78 |
| Tcells.CD8.Effector.vs.Naive.2 Pauken Science.2016 PMID.27789795        | 1.40 | 1.12 | 1.78 | 0.03 | 473.84 |
| Tcells.CD8.Exhausted.vs.Naive.2 Pauken Science.2016 PMID.27789795       | 1.40 | 1.12 | 1.78 | 0.03 | 473.88 |
| MDSC Charoentong CellRep.2017 PMID.28052254                             | 1.41 | 1.12 | 1.79 | 0.03 | 474.17 |
| Plasma.cells CIBERSORT NatMethods.2015 PMID.25822800                    | 1.38 | 1.11 | 1.74 | 0.03 | 474.31 |
| TLS.12genes.Chemokine Zhu FrontImmunol.2017 PMID.28713385               | 1.39 | 1.11 | 1.76 | 0.03 | 474.40 |
| Tcells.CD4.Activated Charoentong CellRep.2017 PMID.28052254             | 1.39 | 1.11 | 1.77 | 0.03 | 474.35 |
| TILs 20                                                                 | 1.86 | 1.20 | 2.91 | 0.04 | 474.98 |
| Immune.Active Hollern Cell.2019 PMID.31730857                           | 1.37 | 1.09 | 1.73 | 0.04 | 475.04 |
| Dendritic.cells.Activated CIBERSORT NatMethods.2015 PMID.25822800       | 1.37 | 1.09 | 1.74 | 0.04 | 475.31 |
| PDCD1.Single.Gene Pare AnnOncol.2019 PMID.30165419                      | 1.39 | 1.10 | 1.78 | 0.04 | 475.19 |
| Cytotoxic.Lymphocytes.MCP Petitprez Nature.2020 PMID.31942077           | 1.37 | 1.09 | 1.73 | 0.04 | 475.18 |
| Tcells.Activation Petitprez Nature.2020 PMID.31942077                   | 1.38 | 1.09 | 1.77 | 0.04 | 475.16 |
| MHC.I.CoreGenes Lauss NatCommun.2017 PMID29170503                       | 1.36 | 1.08 | 1.71 | 0.04 | 475.56 |
| MERCK.Immune.Signature Cristescu Science.2018 PMID.30309915             | 1.36 | 1.09 | 1.73 | 0.04 | 475.44 |
| Tcells.CD8.Exhausted.vs.AntiPDL1.2 Pauken Science.2016 PMID.27789795    | 1.35 | 1.08 | 1.70 | 0.05 | 475.70 |
| Tcells.Cluster Iglesia CCR.2014 PMID.24916698                           | 1.35 | 1.08 | 1.70 | 0.05 | 475.80 |
| Tcells.Th1.cells Bindea Immunity.2013 PMID.24138885                     | 1.34 | 1.07 | 1.68 | 0.06 | 476.16 |
| Tcells.CD8.Memory.vs.Naive.Metagene.3 Pauken Science.2016 PMID.27789795 | 1.34 | 1.07 | 1.70 | 0.06 | 476.18 |
| Monocytes Charoentong CellRep.2017 PMID.28052254                        | 1.34 | 1.07 | 1.68 | 0.06 | 476.30 |
| Tcells.Central.Memory Bindea Immunity.2013 PMID.24138885                | 1.32 | 1.06 | 1.66 | 0.07 | 476.47 |
| Tcells.Th17.cells Charoentong CellRep.2017 PMID.28052254                | 1.32 | 1.06 | 1.66 | 0.07 | 476.47 |
| Immune.CD19 TCGA.BRCA.1198 JCI.2020 PMID.32573490                       | 1.32 | 1.06 | 1.66 | 0.07 | 476.68 |
| Tcells.Follicular.Helper Bindea Immunity.2013 PMID.24138885             | 1.33 | 1.06 | 1.68 | 0.07 | 476.67 |

|                                                                          |      |      |      |      |        |
|--------------------------------------------------------------------------|------|------|------|------|--------|
| Tcells.Follicular.Helper TCGA Immunity.2018 PMID.29628290                | 1.33 | 1.06 | 1.68 | 0.07 | 476.67 |
| TLS.High.In.No.Response Helmk Nature.2020 PMID.31942075                  | 0.76 | 0.61 | 0.95 | 0.07 | 476.90 |
| Mast.cells Bindea Immunity.2013 PMID.24138885                            | 0.77 | 0.61 | 0.95 | 0.08 | 476.97 |
| Macrophages.M0 CIBERSORT NatMethods.2015 PMID.25822800                   | 1.31 | 1.05 | 1.64 | 0.08 | 477.07 |
| MHC.11genes Forero CancerImmunoRes.2016 PMID.26980599                    | 1.30 | 1.04 | 1.63 | 0.08 | 477.42 |
| NK.Activated CIBERSORT NatMethods.2015 PMID.25822800                     | 1.30 | 1.04 | 1.63 | 0.08 | 477.42 |
| CTLA4.Single.Gene Hollern Cell.2019 PMID.31730857                        | 1.32 | 1.04 | 1.69 | 0.08 | 477.31 |
| Tcells.CD8 CIBERSORT NatMethods.2015 PMID.25822800                       | 1.30 | 1.04 | 1.63 | 0.08 | 477.45 |
| Tcells.Follicular.Helper CIBERSORT NatMethods.2015 PMID.25822800         | 1.30 | 1.04 | 1.64 | 0.08 | 477.44 |
| CTLA4.Pathway GSEA.BIOCARTA ProcNatAcadSciUSA.2005 PMID.16199517         | 1.31 | 1.04 | 1.65 | 0.08 | 477.17 |
| Immune.87 Perez JCO.2015 PMID.2560586                                    | 1.30 | 1.04 | 1.64 | 0.08 | 477.24 |
| Tcells.CD8.Activated Charoentong CellRep.2017 PMID.28052254              | 1.30 | 1.04 | 1.64 | 0.08 | 477.34 |
| Tcells.MCP Petitprez Nature.2020 PMID.31942077                           | 1.30 | 1.04 | 1.65 | 0.08 | 477.38 |
| Immune.CD8.GZMK TCGA.BRCA.1198 JCI.2020 PMID.32573490                    | 1.30 | 1.04 | 1.63 | 0.08 | 477.33 |
| Tcells.Effector.Memory Bindea Immunity.2013 PMID.24138885                | 0.78 | 0.62 | 0.97 | 0.08 | 477.50 |
| CD8.Cluster Iglesia CCR.2014 PMID.24916698                               | 1.29 | 1.03 | 1.62 | 0.09 | 477.64 |
| Bcells.Centrocyte Dybkaer JCO.2015 PMID.25800755                         | 1.28 | 1.02 | 1.61 | 0.10 | 478.00 |
| Bcells.Memory CIBERSORT NatMethods.2015 PMID.25822800                    | 1.27 | 1.02 | 1.60 | 0.10 | 478.03 |
| Bcells.Activated Charoentong CellRep.2017 PMID.28052254                  | 1.28 | 1.02 | 1.60 | 0.10 | 477.98 |
| Plasmacytoid.Dendritic.cell Charoentong CellRep.2017 PMID.28052254       | 0.78 | 0.62 | 0.98 | 0.10 | 477.92 |
| MDSC.Tumor.Macrophages Schlecker JImmunol.2012 PMID.23152559             | 1.29 | 1.02 | 1.63 | 0.10 | 478.03 |
| Cytotoxic.cells Bindea Immunity.2013 PMID.24138885                       | 1.28 | 1.02 | 1.60 | 0.10 | 477.99 |
| Tcells.CD8.Central.Memory Charoentong CellRep.2017 PMID.28052254         | 0.79 | 0.63 | 0.98 | 0.10 | 478.03 |
| Tcells.Th2 Charoentong CellRep.2017 PMID.28052254                        | 1.27 | 1.02 | 1.60 | 0.10 | 478.03 |
| TLS.Tumors.w.TLS.and.CD8.vs.CD8.al one Cabrita Nature.2020 PMID.31942071 | 1.27 | 1.02 | 1.60 | 0.10 | 478.03 |

|                                                                                             |      |      |      |      |        |
|---------------------------------------------------------------------------------------------|------|------|------|------|--------|
| MDSC.Granulocytic Youn<br>LeukocBiol.2012 PMID.21954284                                     | 1.27 | 1.02 | 1.60 | 0.10 | 478.07 |
| Tcells.Gamma.Delta CIBERSORT<br>NatMethods.2015 PMID.25822800                               | 1.27 | 1.02 | 1.59 | 0.10 | 478.15 |
| MHC.II Rody<br>BreastCancerResearch.2008<br>PMID.19272155                                   | 1.27 | 1.02 | 1.60 | 0.10 | 478.20 |
| Immune.CD34.TIE1 TCGA.BRCA.1198<br>JCI.2020 PMID.32573490                                   | 0.80 | 0.64 | 0.99 | 0.11 | 478.37 |
| Tcells.Survival.2gene Petitprez<br>Nature.2020 PMID.31942077                                | 1.27 | 1.01 | 1.60 | 0.11 | 478.36 |
| Tcells.NK.51genes Miller<br>GenomeBiol.2013 PMID.23618380                                   | 1.26 | 1.01 | 1.58 | 0.11 | 478.44 |
| Bcells ImSig.Nirmal<br>CancerImmunoRes.2018<br>PMID.30266715                                | 1.26 | 1.01 | 1.58 | 0.11 | 478.48 |
| PD1.Signaling.Reactome GSEA<br>ProcNatAcadSciUSA.2005<br>PMID.16199517                      | 1.26 | 1.01 | 1.59 | 0.11 | 478.51 |
| Tcells.Bcells.Lymphocyte.Infiltration<br>Calabro BreastCancerResTreat.2009<br>PMID.18592372 | 1.25 | 1.01 | 1.57 | 0.12 | 478.59 |
| Lymphocyte.Infiltration.Expression.Score<br>TCGA Immunity.2018 PMID.29628290                | 1.25 | 1.01 | 1.57 | 0.12 | 478.59 |
| Bcells.Memory Charoentong<br>CellRep.2017 PMID.28052254                                     | 1.25 | 1.00 | 1.57 | 0.12 | 478.66 |
| Macrophages Charoentong<br>CellRep.2017 PMID.28052254                                       | 0.80 | 0.64 | 0.99 | 0.12 | 478.58 |
| NK.CD56bright Bindea Immunity.2013<br>PMID.24138885                                         | 1.25 | 1.00 | 1.57 | 0.12 | 478.64 |
| MHC.I Rody<br>BreastCancerResearch.2008<br>PMID.19272155                                    | 1.26 | 1.00 | 1.58 | 0.12 | 478.75 |
| Tcells.CD8.Effector.Memory<br>Charoentong CellRep.2017<br>PMID.28052254                     | 1.25 | 1.00 | 1.57 | 0.12 | 478.75 |
| NK.Resting CIBERSORT<br>NatMethods.2015 PMID.25822800                                       | 1.25 | 1.00 | 1.57 | 0.12 | 478.79 |
| TILs 60                                                                                     | 1.73 | 0.99 | 3.04 | 0.12 | 478.89 |
| Bcells.Tcells.Cooperation Hollern<br>Cell.2019 PMID.31730857                                | 1.24 | 1.00 | 1.55 | 0.12 | 478.86 |
| MCD3.CD8 Fan<br>BMCMedGenomics.2011<br>PMID.21214954                                        | 1.24 | 1.00 | 1.56 | 0.12 | 478.89 |
| Tcells.CD8.Memory.vs.Naive.Metagene.<br>2 Pauken Science.2016<br>PMID.27789795              | 1.24 | 1.00 | 1.56 | 0.12 | 478.88 |
| Tcells.Resident.Memory.Single.cell<br>Savas NatMed.2018 PMID.29942092                       | 1.25 | 1.00 | 1.57 | 0.12 | 478.91 |
| NK.CD56dim Charoentong<br>CellRep.2017 PMID.28052254                                        | 1.23 | 0.99 | 1.54 | 0.13 | 479.07 |
| NK Charoentong CellRep.2017<br>PMID.28052254                                                | 0.81 | 0.65 | 1.01 | 0.13 | 479.13 |
| Tcells.Th2.cells Bindea Immunity.2013<br>PMID.24138885                                      | 1.23 | 0.99 | 1.54 | 0.13 | 479.12 |

|                                                                                              |      |      |      |      |        |
|----------------------------------------------------------------------------------------------|------|------|------|------|--------|
| Bcells.ImmuneProfiles.Mouse.Human Shay PNAS.2013 PMID.23382184                               | 1.23 | 0.98 | 1.53 | 0.14 | 479.29 |
| Bcells.Immature Charoentong CellRep.2017 PMID.28052254                                       | 1.23 | 0.98 | 1.53 | 0.14 | 479.32 |
| Immune.HLA.A.F TCGA.BRCA.1198 JCI.2020 PMID.32573490                                         | 1.23 | 0.98 | 1.55 | 0.14 | 479.28 |
| Bcells.Memory Dybaer JCO.2015 PMID.25800755                                                  | 1.23 | 0.98 | 1.54 | 0.14 | 479.31 |
| Macrophages.Th1.Cluster Iglesia CCR.2014 PMID.24916698                                       | 1.23 | 0.98 | 1.54 | 0.15 | 479.37 |
| Immune.CD4.CD53.CD84.BTK TCGA.BRCA.1198 JCI.2020 PMID.32573490                               | 1.22 | 0.98 | 1.54 | 0.15 | 479.42 |
| Immune.Hot.vs.Cold.CD8 Cabrita Nature.2020 PMID.31942071                                     | 1.22 | 0.98 | 1.54 | 0.15 | 479.45 |
| LCK Rody BreastCancerResearch.2008 PMID.19272155                                             | 1.22 | 0.98 | 1.53 | 0.15 | 479.50 |
| Tcells.CD8.Exhausted.vs.Naive.Metagen.1 Pauken Science.2016 PMID.27789795                    | 1.22 | 0.98 | 1.54 | 0.15 | 479.48 |
| Tcells.Bcell.Cluster Fan BMCMedGenomics.2011 PMID.21214954                                   | 1.22 | 0.98 | 1.54 | 0.16 | 479.55 |
| Tcells Bindea Immunity.2013 PMID.24138885                                                    | 1.22 | 0.98 | 1.54 | 0.16 | 479.56 |
| Bcells.Naive CIBERSORT NatMethods.2015 PMID.25822800                                         | 1.21 | 0.98 | 1.52 | 0.16 | 479.61 |
| Tcells.Gamma.Delta Bindea Immunity.2013 PMID.24138885                                        | 1.21 | 0.98 | 1.51 | 0.16 | 479.63 |
| Tcells.Gamma.Delta TCGA Immunity.2018 PMID.29628290                                          | 1.21 | 0.98 | 1.51 | 0.16 | 479.63 |
| Tcells ImSig.Nirmal CancerImmunolRes.2018 PMID.30266715                                      | 1.21 | 0.97 | 1.52 | 0.16 | 479.68 |
| Tcells.CD8.Exhausted.at.day.8.post.Imm.vs.Naive.Metagene.1 Pauken Science.2016 PMID.27789795 | 1.22 | 0.97 | 1.53 | 0.16 | 479.71 |
| Bcells Bindea Immunity.2013 PMID.24138885                                                    | 1.20 | 0.96 | 1.50 | 0.19 | 479.95 |
| Tcells.NK.Metagene Miller GenomeBiol.2013 PMID.23618380                                      | 1.20 | 0.96 | 1.50 | 0.20 | 480.03 |
| Macrophages.Monocytes.CSF1.Response Beck CCR.2009 PMID.19188147                              | 1.20 | 0.96 | 1.50 | 0.20 | 480.09 |
| CSF1.Response TCGA Immunity.2018 PMID.29628290                                               | 1.20 | 0.96 | 1.50 | 0.20 | 480.09 |
| Neutrophils.Activated.Lung Janiszewska NatCellBiol.2019 PMID.31263265                        | 1.20 | 0.96 | 1.51 | 0.20 | 480.05 |
| Tcells.CD4.Memory.Resting CIBERSORT NatMethods.2015 PMID.25822800                            | 1.20 | 0.96 | 1.50 | 0.20 | 480.08 |
| Tcells.Th1.cells Charoentong CellRep.2017 PMID.28052254                                      | 1.20 | 0.96 | 1.50 | 0.20 | 480.10 |
| NK ImSig.Nirmal CancerImmunolRes.2018 PMID.30266715                                          | 1.19 | 0.96 | 1.49 | 0.20 | 480.17 |

|                                                                                |      |      |      |      |        |
|--------------------------------------------------------------------------------|------|------|------|------|--------|
| Tcells.CD8.Exhausted.vs.Naive.Metagen.3 Pauken Science.2016<br>PMID.27789795   | 1.20 | 0.96 | 1.50 | 0.20 | 480.17 |
| Tcells.CD8.MCP Petitprez Nature.2020<br>PMID.31942077                          | 1.20 | 0.96 | 1.51 | 0.20 | 480.19 |
| Tcells.Regulatory.Tregs CIBERSORT<br>NatMethods.2015 PMID.25822800             | 1.19 | 0.95 | 1.49 | 0.20 | 480.21 |
| Tcells.CD4.Naive CIBERSORT<br>NatMethods.2015 PMID.25822800                    | 1.19 | 0.95 | 1.49 | 0.22 | 480.31 |
| Neutrophils ImSig.Nirmal<br>CancerImmunolRes.2018<br>PMID.30266715             | 1.19 | 0.95 | 1.51 | 0.22 | 480.32 |
| Dendritic.cells.Immature. Bindea<br>Immunity.2013 PMID.24138885                | 1.18 | 0.95 | 1.48 | 0.22 | 480.38 |
| MDSC.Neutrophil Youn<br>LeukocBiol.2012 PMID.21954284                          | 1.19 | 0.95 | 1.49 | 0.22 | 480.38 |
| Macrophages ImSig.Nirmal<br>CancerImmunolRes.2018<br>PMID.30266715             | 1.18 | 0.95 | 1.48 | 0.22 | 480.42 |
| Immune.Cell.Content Verhaak<br>NatCommun.2013 PMID.24113773                    | 1.18 | 0.95 | 1.48 | 0.22 | 480.43 |
| IFNg.Module11 Gatza<br>ProcNatlAcadSciUSA.2010<br>PMID.20335537                | 1.18 | 0.95 | 1.48 | 0.23 | 480.47 |
| Influenza.11genes Khatri Immunity.2015<br>PMID.26682989                        | 1.18 | 0.95 | 1.47 | 0.23 | 480.47 |
| Bcells.IL10.Plus Lin JImmunol.2014<br>PMID.25080484                            | 1.18 | 0.94 | 1.48 | 0.23 | 480.49 |
| TLS.Known.Markers Cabrita<br>Nature.2020 PMID.31942071                         | 1.17 | 0.94 | 1.47 | 0.24 | 480.56 |
| Neutrophils.Activated.Blood<br>Janiszewska NatCellBiol.2019<br>PMID.31263265   | 0.85 | 0.67 | 1.06 | 0.24 | 480.57 |
| TLS.Hallmark Cabrita Nature.2020<br>PMID.31942071                              | 1.17 | 0.94 | 1.47 | 0.24 | 480.61 |
| Monocytes CIBERSORT<br>NatMethods.2015 PMID.25822800                           | 1.17 | 0.94 | 1.46 | 0.24 | 480.62 |
| Dendritic.cells.Resting CIBERSORT<br>NatMethods.2015 PMID.25822800             | 1.16 | 0.94 | 1.45 | 0.26 | 480.75 |
| Tcells.Regulatory Charoentong<br>CellRep.2017 PMID.28052254                    | 1.17 | 0.93 | 1.46 | 0.26 | 480.77 |
| Immune.HLA.D TCGA.BRCA.1198<br>JCI.2020 PMID.32573490                          | 1.17 | 0.93 | 1.46 | 0.26 | 480.78 |
| Monocytes..Dendritic.cell.Metagene<br>Miller GenomeBiol.2013<br>PMID.23618380  | 1.17 | 0.93 | 1.46 | 0.26 | 480.80 |
| Tcells.CD8.Memory.vs.Naive.1 Pauken<br>Science.2016 PMID.27789795              | 1.17 | 0.93 | 1.47 | 0.26 | 480.81 |
| Tcells.CD8.Memory.vs.Naive.Metagene.<br>1 Pauken Science.2016<br>PMID.27789795 | 1.17 | 0.93 | 1.47 | 0.26 | 480.81 |
| Cytolytic.Activity Rooney Cell.2015<br>PMID.25594174                           | 1.16 | 0.93 | 1.46 | 0.27 | 480.87 |
| Monocytes.Dendritic.25genes Miller<br>GenomeBiol.2013 PMID.23618380            | 1.15 | 0.92 | 1.44 | 0.32 | 481.11 |



|                                                                                                       |      |      |      |      |        |
|-------------------------------------------------------------------------------------------------------|------|------|------|------|--------|
| IFN.Cluster.GSEA.GP11 Fan<br>BMC Med Genomics.2011<br>PMID.21214954                                   | 1.15 | 0.92 | 1.43 | 0.32 | 481.14 |
| Tcells.CD8 Bindea Immunity.2013<br>PMID.24138885                                                      | 0.87 | 0.70 | 1.09 | 0.32 | 481.14 |
| Neutrophils Bindea Immunity.2013<br>PMID.24138885                                                     | 0.88 | 0.70 | 1.09 | 0.34 | 481.25 |
| Tcells.CD4.Central.Memory<br>Charoentong CellRep.2017<br>PMID.28052254                                | 0.88 | 0.71 | 1.09 | 0.35 | 481.29 |
| Neutrophils CIBERSORT<br>NatMethods.2015 PMID.25822800                                                | 1.13 | 0.91 | 1.42 | 0.35 | 481.33 |
| Dendritic.cells Bindea Immunity.2013<br>PMID.24138885                                                 | 1.13 | 0.91 | 1.42 | 0.36 | 481.35 |
| Bcells.IL10.Minus Lin JImmunol.2014<br>PMID.25080484                                                  | 1.13 | 0.91 | 1.41 | 0.39 | 481.46 |
| Serum.Response.Up TCGA<br>Immunity.2018 PMID.29628290                                                 | 1.13 | 0.90 | 1.41 | 0.40 | 481.54 |
| Bcells Garber<br>CellMolGastroenterolHepatol.2017<br>PMID.28508029                                    | 1.12 | 0.90 | 1.39 | 0.41 | 481.57 |
| NK.MCP Helmkink Nature.2020<br>PMID.31942077                                                          | 1.12 | 0.90 | 1.39 | 0.41 | 481.60 |
| Tcells.Bcell.KEGG.hematopoietic.cell.lin<br>eage GSEA.GP2<br>ProcNatlAcadSciUSA.2005<br>PMID.16199517 | 1.12 | 0.90 | 1.40 | 0.41 | 481.59 |
| Macrophages.M2 CIBERSORT<br>NatMethods.2015 PMID.25822800                                             | 1.12 | 0.90 | 1.40 | 0.42 | 481.62 |
| Tcells.CD4.Effector.Memory<br>Charoentong CellRep.2017<br>PMID.28052254                               | 0.90 | 0.72 | 1.12 | 0.43 | 481.66 |
| IFNa.Module10 Gatza<br>ProcNatlAcadSciUSA.2010<br>PMID.20335537                                       | 1.12 | 0.90 | 1.39 | 0.43 | 481.67 |
| Wound.Healing Chang PlosBiol.2004<br>PMID.14737219                                                    | 1.11 | 0.89 | 1.39 | 0.44 | 481.72 |
| Macrophages Bindea Immunity.2013<br>PMID.24138885                                                     | 1.11 | 0.89 | 1.39 | 0.44 | 481.72 |
| Granulocytes.ImmuneProfiles.Mouse.Hu<br>man Shay PNAS.2013 PMID.23382184                              | 1.11 | 0.89 | 1.40 | 0.46 | 481.77 |
| MDSC.Tumor Schlecker JImmunol.2012<br>PMID.23152559                                                   | 1.11 | 0.89 | 1.39 | 0.46 | 481.80 |
| Tcells.ImmuneProfiles.Mouse.Human<br>Shay PNAS.2013 PMID.23382184                                     | 1.10 | 0.89 | 1.37 | 0.48 | 481.84 |
| Tcells.CD8.Exhausted.Anti.PDL1.vs.Co<br>ntrol.Metagene.1 Pauken Science.2016<br>PMID.27789795         | 1.10 | 0.89 | 1.38 | 0.48 | 481.86 |
| Tcells.Theelper Bindea Immunity.2013<br>PMID.24138885                                                 | 1.10 | 0.88 | 1.37 | 0.49 | 481.88 |
| HCK Rody BreastCancerResearch.2008<br>PMID.19272155                                                   | 1.10 | 0.88 | 1.38 | 0.49 | 481.90 |
| NK.ImmuneProfiles.Mouse.Human Shay<br>PNAS.2013 PMID.23382184                                         | 1.10 | 0.88 | 1.36 | 0.50 | 481.93 |

|                                                                                         |      |      |      |      |        |
|-----------------------------------------------------------------------------------------|------|------|------|------|--------|
| Bcells.Extended Garber<br>CellMolGastroenterolHepatol.2017<br>PMID.28508029             | 0.91 | 0.73 | 1.14 | 0.50 | 481.94 |
| Dendritic.cells.Activated Charoentong<br>CellRep.2017 PMID.28052254                     | 1.09 | 0.88 | 1.37 | 0.52 | 481.98 |
| Mast.cells.Resting CIBERSORT<br>NatMethods.2015 PMID.25822800                           | 1.08 | 0.87 | 1.35 | 0.57 | 482.10 |
| Mast.cell Charoentong CellRep.2017<br>PMID.28052254                                     | 0.93 | 0.74 | 1.15 | 0.58 | 482.13 |
| Tcells.Th17.cells Bindea Immunity.2013<br>PMID.24138885                                 | 0.93 | 0.75 | 1.15 | 0.61 | 482.19 |
| Immune.14 Perez JCO.2015<br>PMID.2560586                                                | 1.07 | 0.86 | 1.33 | 0.65 | 482.27 |
| IFN Rody BreastCancerResearch.2008<br>PMID.19272155                                     | 0.94 | 0.75 | 1.16 | 0.65 | 482.26 |
| MHC.24genes Forero<br>CancerImmunolRes.2016<br>PMID.26980599                            | 0.94 | 0.75 | 1.17 | 0.65 | 482.27 |
| Macrophages.ImmuneProfiles.Mouse.H<br>uman Shay PNAS.2013<br>PMID.23382184              | 1.06 | 0.85 | 1.33 | 0.68 | 482.32 |
| Immunosuppression Petitprez<br>Nature.2020 PMID.31942077                                | 0.95 | 0.76 | 1.18 | 0.71 | 482.37 |
| Hematopoietic.Stem.cells.ImmuneProfil<br>es.Mouse.Human Shay PNAS.2013<br>PMID.23382184 | 1.06 | 0.85 | 1.32 | 0.71 | 482.37 |
| Neutrophils Charoentong CellRep.2017<br>PMID.28052254                                   | 0.95 | 0.75 | 1.18 | 0.71 | 482.37 |
| Tcells.Follicular.Helper Charoentong<br>CellRep.2017 PMID.28052254                      | 1.06 | 0.85 | 1.32 | 0.71 | 482.36 |
| Eosinophils Charoentong CellRep.2017<br>PMID.28052254                                   | 1.06 | 0.85 | 1.32 | 0.71 | 482.38 |
| Tcells.Gamma.Delta Charoentong<br>CellRep.2017 PMID.28052254                            | 1.05 | 0.85 | 1.31 | 0.71 | 482.39 |
| NK Bindea Immunity.2013<br>PMID.24138885                                                | 0.95 | 0.77 | 1.18 | 0.73 | 482.41 |
| Tcells.Regulatory.cell.2gene Petitprez<br>Nature.2020 PMID.31942077                     | 0.95 | 0.76 | 1.19 | 0.73 | 482.41 |
| Immune.GIMAP.IL16 TCGA.BRCA.1198<br>JCI.2020 PMID.32573490                              | 1.05 | 0.84 | 1.31 | 0.73 | 482.42 |
| NK.CD56bright Charoentong<br>CellRep.2017 PMID.28052254                                 | 1.05 | 0.84 | 1.31 | 0.76 | 482.46 |
| Bcells.Naive Dybaer JCO.2015<br>PMID.25800755                                           | 0.97 | 0.78 | 1.20 | 0.83 | 482.52 |
| IFN.Pathway ImSig.Nirmal<br>CancerImmunolRes.2018<br>PMID.30266715                      | 1.03 | 0.83 | 1.29 | 0.83 | 482.53 |
| Immune.FOS.JUN.IL6<br>TCGA.BRCA.1198 JCI.2020<br>PMID.32573490                          | 0.97 | 0.77 | 1.21 | 0.83 | 482.53 |
| Macrophages.M2 Ghassabeh<br>Blood.2006 PMID.16556895                                    | 1.03 | 0.83 | 1.29 | 0.83 | 482.52 |
| Monocytes ImSig.Nirmal<br>CancerImmunolRes.2018<br>PMID.30266715                        | 1.03 | 0.83 | 1.30 | 0.83 | 482.53 |

|                                                                     |      |      |      |      |        |
|---------------------------------------------------------------------|------|------|------|------|--------|
| IFN.3.ImmLandscape Wolf<br>PlosOne.2014 PMID.24516633               | 0.97 | 0.78 | 1.21 | 0.87 | 482.56 |
| IFN.Score.module3 TCGA<br>Immunity.2018 PMID.29628290               | 0.97 | 0.78 | 1.21 | 0.87 | 482.56 |
| NK.Tcell Charoentong CellRep.2017<br>PMID.28052254                  | 1.03 | 0.82 | 1.28 | 0.87 | 482.57 |
| Dendritic.cells.Immature. Charoentong<br>CellRep.2017 PMID.28052254 | 1.02 | 0.82 | 1.27 | 0.88 | 482.58 |
| IFN.Cluster Fan<br>BMCMedGenomics.2011<br>PMID.21214954             | 0.98 | 0.79 | 1.21 | 0.88 | 482.58 |
| Mast.cells.Activated CIBERSORT<br>NatMethods.2015 PMID.25822800     | 1.02 | 0.82 | 1.27 | 0.88 | 482.57 |
| Immune.IFN TCGA.BRCA.1198<br>JCI.2020 PMID.32573490                 | 0.98 | 0.79 | 1.22 | 0.88 | 482.58 |
| Eosinophils Bindea Immunity.2013<br>PMID.24138885                   | 1.02 | 0.82 | 1.27 | 0.90 | 482.59 |
| CD103.Negative Broz CancerCell.2014<br>PMID.25446897                | 1.01 | 0.81 | 1.26 | 0.95 | 482.61 |
| CD68.Cluster Iglesia CCR.2014<br>PMID.24916698                      | 0.99 | 0.80 | 1.23 | 0.96 | 482.61 |
| Neutrophils.MCP Petitprez Nature.2020<br>PMID.31942077              | 0.99 | 0.80 | 1.24 | 0.97 | 482.61 |
| TLS.9genes Cabrita Nature.2020<br>PMID.31942071                     | 1.00 | 0.81 | 1.25 | 0.98 | 482.62 |
| TGFB.score TCGA Immunity.2018<br>PMID.29628290                      | 1.00 | 0.81 | 1.25 | 0.99 | 482.62 |
| Eosinophils CIBERSORT<br>NatMethods.2015 PMID.25822800              | 1.00 | 0.81 | 1.24 | 0.99 | 482.62 |

Logistic regression multivariable models adjusted by study and treatment arm has been built for each biomarker. P-values are adjusted for multiple testing using a Benjamini & Hochberg method to control the False Discovery Rate.

**eTable 5. Association of Tumor-Infiltrating Lymphocytes (TILs) and Immune Gene Expression Signatures (iGES) With Pathologic Complete Response (pCR) in the Presence of Clinical Parameters Using the Combined CALGB 40601 and PAMELA Cohort**

| Signatures                                                        | OR   | Lower CI | Upper CI | p value | AIC    |
|-------------------------------------------------------------------|------|----------|----------|---------|--------|
| Bcells.Plasma.cells.52genes Miller GenomeBiol.2013 PMID.23618380  | 1.82 | 1.39     | 2.40     | 0.002   | 429.72 |
| Ig TCGA.BRCA.1198 Cell.2015 PMID.26451490                         | 1.80 | 1.38     | 2.37     | 0.002   | 420.23 |
| Plasma.cells ImSig.Nirmal CancerImmunolRes.2018 PMID.30266715     | 1.82 | 1.40     | 2.42     | 0.002   | 429.49 |
| IgG Rody BreastCancerResearch.2008 PMID.19272155                  | 1.67 | 1.29     | 2.19     | 0.005   | 434.08 |
| Immune1 TCGA.BRCA.1198 JCI.2020 PMID.32573490                     | 1.66 | 1.29     | 2.17     | 0.005   | 434.23 |
| IGG.Cluster Fan BMCMedGenomics.2011 PMID.21214954                 | 1.55 | 1.21     | 2.01     | 0.02    | 438.13 |
| NK.CD56dim Bindea Immunity.2013 PMID.24138885                     | 1.53 | 1.18     | 2.00     | 0.03    | 439.31 |
| Bcells.Plasma.cells.Metagene Miller GenomeBiol.2013 PMID.23618380 | 1.54 | 1.20     | 2.01     | 0.03    | 438.43 |
| TLS.High.In.Response.MCP Helmink Nature.2020 PMID.31942075        | 1.57 | 1.22     | 2.05     | 0.02    | 437.57 |
| TILs                                                              | 1.01 | 1.00     | 1.02     | 0.18    | 444.48 |

Logistic regression multivariable models are adjusted by study, treatment arm, clinical stage, age, HR-status, menopausal status, and subtype.

Only the iGES significantly associated with pCR and TILs are shown.

P-values are adjusted for multiple testing using a Benjamini & Hochberg method to control the False Discovery Rate.

**eTable 6. Accuracy Metrics (Area Under the Curve From the Receiver Operating Characteristic Curves: AUC ROC) of the Univariable Immune-Biomarker Models to Predict Pathologic Complete Response (pCR)**

| <b>Signature</b>                                                                             | <b>AUC<br/>CALGB 40601</b> | <b>AUC<br/>PAMELA</b> |
|----------------------------------------------------------------------------------------------|----------------------------|-----------------------|
| Ig TCGA.BRCA.1198 Cell.2015 PMID.26451490                                                    | 0.64                       | 0.65                  |
| Immune.CTLA4.CXCL.FOXP3 TCGA.BRCA.1198 JCI.2020 PMID.32573490.                               | 0.60                       | 0.64                  |
| Bcells.Plasma.cells.52genes Miller GenomeBiol.2013 PMID.23618380                             | 0.63                       | 0.64                  |
| IgG Rody BreastCancerResearch.2008 PMID.19272155                                             | 0.62                       | 0.64                  |
| Plasma.cells ImSig.Nirmal CancerImmunolRes.2018 PMID.30266715                                | 0.66                       | 0.63                  |
| Immune1 TCGA.BRCA.1198 JCI.2020 PMID.32573490                                                | 0.62                       | 0.62                  |
| IGG.Cluster Fan BMCMedGenomics.2011 PMID.21214954                                            | 0.60                       | 0.62                  |
| Bcells.Plasmablast Dybaer JCO.2015 PMID.25800755                                             | 0.62                       | 0.59                  |
| TILs                                                                                         | 0.60                       | 0.57                  |
| Monocytes Charoentong CellRep.2017 PMID.28052254                                             | 0.62                       | 0.56                  |
| Dendritic.cells.ImmuneProfiles.Mouse.Human Shay PNAS.2013 PMID.23382184                      | 0.62                       | 0.56                  |
| MDSC.Granulocytic Youn LeukocBiol.2012 PMID.21954284                                         | 0.61                       | 0.53                  |
| TILs 40                                                                                      | 0.60                       | 0.59                  |
| TLS.High.In.Response.MCP Helmink Nature.2020 PMID.31942075                                   | 0.60                       | 0.63                  |
| IFN.5.ImmLandscape Wolf PlosOne.2014 PMID.24516633                                           | 0.59                       | 0.60                  |
| Tcells.CD8.Exhausted.vs.AntiPDL1.2 Pauken Science.2016 PMID.27789795                         | 0.59                       | 0.53                  |
| Plasma.cells CIBERSORT NatMethods.2015 PMID.25822800                                         | 0.59                       | 0.55                  |
| MDSC.Tumor.Macrophages Schlecker JImmunol.2012 PMID.23152559                                 | 0.59                       | 0.61                  |
| MHC.11genes Forero CancerImmunolRes.2016 PMID.26980599                                       | 0.59                       | 0.58                  |
| PD1.Signaling.Reactome GSEA ProcNatlAcadSciUSA.2005 PMID.16199517                            | 0.59                       | 0.56                  |
| TLS.High.In.No.Response Helmink Nature.2020 PMID.31942075                                    | 0.58                       | 0.55                  |
| TILs 20                                                                                      | 0.58                       | 0.55                  |
| Bcells.Centrocyte Dybkaer JCO.2015 PMID.25800755                                             | 0.58                       | 0.52                  |
| Bcells.Plasma.cells.Metagene Miller GenomeBiol.2013 PMID.23618380                            | 0.58                       | 0.63                  |
| Tcells.CD8.Exhausted.at.day.8.post.Imm.vs.Naive.Metagene.1 Pauken Science.2016 PMID.27789795 | 0.58                       | 0.56                  |
| Tcells.CD4.Activated Charoentong CellRep.2017 PMID.28052254                                  | 0.58                       | 0.54                  |
| Bcells.Centroblast Dybkae JCO.2015 PMID.25800755                                             | 0.58                       | 0.63                  |
| Macrophages.M0 CIBERSORT NatMethods.2015 PMID.25822800                                       | 0.58                       | 0.60                  |
| NK.CD56dim Bindea Immunity.2013 PMID.24138885                                                | 0.58                       | 0.63                  |
| Tcells.CD8.Exhausted.vs.Naive.Metagene.3 Pauken Science.2016 PMID.27789795                   | 0.57                       | 0.57                  |

|                                                                            |      |      |
|----------------------------------------------------------------------------|------|------|
| Tcells.CD4.Memory.Activated CIBERSORT NatMethods.2015 PMID.25822800        | 0.57 | 0.58 |
| CD274.Single.Gene Hollern Cell.2019 PMID.31730857                          | 0.57 | 0.65 |
| Tcells.Th1.cells Bindea Immunity.2013 PMID.24138885                        | 0.57 | 0.56 |
| Tcells.CD8.Exhausted.vs.Naive.Metagene.1 Pauken Science.2016 PMID.27789795 | 0.57 | 0.53 |
| Tcells.Th17.cells Charoentong CellRep.2017 PMID.28052254                   | 0.57 | 0.53 |
| Tcells.CD8.Memory.vs.Naive.1 Pauken Science.2016 PMID.27789795             | 0.57 | 0.55 |
| MHC.II Rody BreastCancerResearch.2008 PMID.19272155                        | 0.57 | 0.59 |
| MDSC Charoentong CellRep.2017 PMID.28052254                                | 0.57 | 0.60 |
| PDCD1.Single.Gene Pare AnnOncol.2019 PMID.30165419                         | 0.57 | 0.61 |
| Tcells.Activation Petitprez Nature.2020 PMID.31942077                      | 0.57 | 0.62 |
| Tcells.Central.Memory Bindea Immunity.2013 PMID.24138885                   | 0.57 | 0.59 |
| TLS.12genes.Chemokine Zhu FrontImmunol.2017 PMID.28713385                  | 0.57 | 0.60 |
| Immune.CD8.GZMK TCGA.BRCA.1198 JCI.2020 PMID.32573490                      | 0.56 | 0.56 |
| Tcells.Th2 Charoentong CellRep.2017 PMID.28052254                          | 0.56 | 0.64 |
| TILs 60                                                                    | 0.56 | 0.55 |
| Neutrophils CIBERSORT NatMethods.2015 PMID.25822800                        | 0.56 | 0.55 |
| Dendritic.cells.Activated Bindea Immunity.2013 PMID.24138885               | 0.56 | 0.60 |
| Bcells.Memory Dybaer JCO.2015 PMID.25800755                                | 0.56 | 0.58 |
| STAT1 Rody BreastCancerResearch.2008 PMID.19272155                         | 0.56 | 0.61 |
| LCK Rody BreastCancerResearch.2008 PMID.19272155                           | 0.56 | 0.56 |
| Tcells.CD8.Effector.vs.Naive.2 Pauken Science.2016 PMID.27789795           | 0.56 | 0.58 |
| MERCK.Immune.Signature Cristescu Science.2018 PMID.30309915                | 0.56 | 0.60 |
| CTLA4.Single.Gene Hollern Cell.2019 PMID.31730857                          | 0.56 | 0.59 |
| Tcells.Cluster Iglesia CCR.2014 PMID.24916698                              | 0.56 | 0.57 |
| Immune.Suppression Kardos JCIInsight.2016 PMID.27699256                    | 0.56 | 0.61 |
| Tcells.CD8.Memory.vs.Naive.Metagene.3 Pauken Science.2016 PMID.27789795    | 0.56 | 0.57 |
| Immune.87 Perez JCO.2015 PMID.2560586                                      | 0.56 | 0.57 |
| Immune.Active Hollern Cell.2019 PMID.31730857                              | 0.56 | 0.59 |
| Neutrophils.Activated.Blood Janiszewska NatCellBiol.2019 PMID.31263265     | 0.56 | 0.50 |
| Tcells.CD8.Central.Memory Charoentong CellRep.2017 PMID.28052254           | 0.56 | 0.54 |
| Tcells.CD8.Activated Charoentong CellRep.2017 PMID.28052254                | 0.56 | 0.56 |
| TLS.Known.Markers Cabrita Nature.2020 PMID.31942071                        | 0.56 | 0.53 |
| Tcells.CD8.Exhausted.vs.Naive.2 Pauken Science.2016 PMID.27789795          | 0.56 | 0.59 |
| Stromal.Inflammation Heng JPathol.2017 PMID.27861902                       | 0.56 | 0.60 |
| MHC.I.CoreGenes Lauss NatCommun.2017 PMID29170503                          | 0.56 | 0.64 |
| Macrophages.M1 CIBERSORT NatMethods.2015 PMID.25822800                     | 0.55 | 0.61 |

|                                                                                  |      |      |
|----------------------------------------------------------------------------------|------|------|
| NK ImSig.Nirmal CancerImmunolRes.2018 PMID.30266715                              | 0.55 | 0.55 |
| Dendritic.cells.Activated CIBERSORT NatMethods.2015 PMID.25822800                | 0.55 | 0.61 |
| CD8.Cluster Iglesia CCR.2014 PMID.24916698                                       | 0.55 | 0.56 |
| Bcells.Extended Garber CellMolGastroenterolHepato.2017 PMID.28508029             | 0.55 | 0.55 |
| NK.Resting CIBERSORT NatMethods.2015 PMID.25822800                               | 0.55 | 0.56 |
| Bcells.Cluster Iglesia CCR.2014 PMID.24916698                                    | 0.55 | 0.56 |
| Tcells.NK.51genes Miller GenomeBiol.2013 PMID.23618380                           | 0.55 | 0.58 |
| Tcells.Gamma.Delta CIBERSORT NatMethods.2015 PMID.25822800                       | 0.55 | 0.56 |
| TLS.Tumors.w.TLS.and.CD8.vs.CD8.alone Cabrita Nature.2020 PMID.31942071          | 0.55 | 0.55 |
| Bcells.Activated Charoentong CellRep.2017 PMID.28052254                          | 0.55 | 0.55 |
| Neutrophils Bindea Immunity.2013 PMID.24138885                                   | 0.55 | 0.53 |
| Hematopoietic.Stem.cells.ImmuneProfiles.Mouse.Human Shay PNAS.2013 PMID.23382184 | 0.55 | 0.45 |
| TLS.Hallmark Cabrita Nature.2020 PMID.31942071                                   | 0.55 | 0.51 |
| NK Charoentong CellRep.2017 PMID.28052254                                        | 0.55 | 0.56 |
| Tcells.Th2.cells Bindea Immunity.2013 PMID.24138885                              | 0.55 | 0.62 |
| Tcells.CD8.Memory.vs.Naive.Metagene.2 Pauken Science.2016 PMID.27789795          | 0.55 | 0.59 |
| Immune.GIMAP.IL16 TCGA.BRCA.1198 JCI.2020 PMID.32573490                          | 0.55 | 0.53 |
| Tcells.Survival.2gene Petitprez Nature.2020 PMID.31942077                        | 0.55 | 0.57 |
| Tcells.CD4.Naive CIBERSORT NatMethods.2015 PMID.25822800                         | 0.55 | 0.53 |
| Bcells ImSig.Nirmal CancerImmunolRes.2018 PMID.30266715                          | 0.55 | 0.55 |
| NK.CD56bright Bindea Immunity.2013 PMID.24138885                                 | 0.55 | 0.59 |
| Bcells.Memory Charoentong CellRep.2017 PMID.28052254                             | 0.55 | 0.58 |
| Tcells ImSig.Nirmal CancerImmunolRes.2018 PMID.30266715                          | 0.55 | 0.56 |
| MCD3.CD8 Fan BMCMedGenomics.2011 PMID.21214954                                   | 0.55 | 0.56 |
| Macrophages Charoentong CellRep.2017 PMID.28052254                               | 0.55 | 0.52 |
| Bcells.Immature Charoentong CellRep.2017 PMID.28052254                           | 0.54 | 0.55 |
| Proliferation.Pathway ImSig.Nirmal CancerImmunolRes.2018 PMID.30266715           | 0.54 | 0.59 |
| Immune.FOS.JUN.IL6 TCGA.BRCA.1198 JCI.2020 PMID.32573490                         | 0.54 | 0.50 |
| IFN.Score.module3 TCGA Immunity.2018 PMID.29628290                               | 0.54 | 0.43 |
| TLS.9genes Cabrita Nature.2020 PMID.31942071                                     | 0.54 | 0.52 |
| Dendritic.cells.Activated Charoentong CellRep.2017 PMID.28052254                 | 0.54 | 0.60 |
| IFN.Cluster Fan BMCMedGenomics.2011 PMID.21214954                                | 0.54 | 0.44 |
| Immune.IFN TCGA.BRCA.1198 JCI.2020 PMID.32573490                                 | 0.54 | 0.44 |
| Tcells.CD8.Memory.vs.Naive.Metagene.1 Pauken Science.2016 PMID.27789795          | 0.54 | 0.55 |
| CD68.Cluster Iglesia CCR.2014 PMID.24916698                                      | 0.54 | 0.47 |

|                                                                                       |      |      |
|---------------------------------------------------------------------------------------|------|------|
| Tcells.Bcells.Lymphocyte.Infiltration Calabro BreastCancerResTreat.2009 PMID.18592372 | 0.54 | 0.57 |
| Tcells.Effector.Memory Bindea Immunity.2013 PMID.24138885                             | 0.54 | 0.54 |
| CD103.Negative Broz CancerCell.2014 PMID.25446897                                     | 0.54 | 0.54 |
| Bcells Bindea Immunity.2013 PMID.24138885                                             | 0.54 | 0.57 |
| Tcells.Thelper Bindea Immunity.2013 PMID.24138885                                     | 0.54 | 0.51 |
| TGFB.score TCGA Immunity.2018 PMID.29628290                                           | 0.54 | 0.48 |
| Mast.cells.Activated CIBERSORT NatMethods.2015 PMID.25822800                          | 0.54 | 0.53 |
| Neutrophils Charoentong CellRep.2017 PMID.28052254                                    | 0.54 | 0.44 |
| NK.Tcell Charoentong CellRep.2017 PMID.28052254                                       | 0.54 | 0.51 |
| Lymphocyte.Infiltration.Expression.Score TCGA Immunity.2018 PMID.29628290             | 0.54 | 0.57 |
| Eosinophils Bindea Immunity.2013 PMID.24138885                                        | 0.54 | 0.45 |
| IFN.3.ImmLandscape Wolf PlosOne.2014 PMID.24516633                                    | 0.54 | 0.43 |
| NK Bindea Immunity.2013 PMID.24138885                                                 | 0.54 | 0.54 |
| Neutrophils.Activated.Lung Janiszewska NatCellBiol.2019 PMID.31263265                 | 0.54 | 0.51 |
| NK.CD56bright Charoentong CellRep.2017 PMID.28052254                                  | 0.54 | 0.53 |
| Bcells.Naive CIBERSORT NatMethods.2015 PMID.25822800                                  | 0.54 | 0.54 |
| Cytotoxic.cells Bindea Immunity.2013 PMID.24138885                                    | 0.54 | 0.57 |
| Tcells.Bcell.Cluster Fan BMCMedGenomics.2011 PMID.21214954                            | 0.54 | 0.59 |
| Macrophages.Th1.Cluster Iglesia CCR.2014 PMID.24916698                                | 0.54 | 0.58 |
| Tcells.CD8.Effector.Memory Charoentong CellRep.2017 PMID.28052254                     | 0.54 | 0.60 |
| CSF1.Response TCGA Immunity.2018 PMID.29628290                                        | 0.54 | 0.58 |
| Mast.cells Bindea Immunity.2013 PMID.24138885                                         | 0.54 | 0.63 |
| Eosinophils Charoentong CellRep.2017 PMID.28052254                                    | 0.54 | 0.46 |
| Bcells.Naive Dybaer JCO.2015 PMID.25800755                                            | 0.54 | 0.44 |
| Monocytes.Dendritic.25genes Miller GenomeBiol.2013 PMID.23618380                      | 0.54 | 0.57 |
| Tcells.Follicular.Helper TCGA Immunity.2018 PMID.29628290                             | 0.54 | 0.62 |
| IFN Rody BreastCancerResearch.2008 PMID.19272155                                      | 0.54 | 0.58 |
| Tcells.Resident.Memory.Single.cell Savas NatMed.2018 PMID.29942092                    | 0.54 | 0.61 |
| Tcells.Th17.cells Bindea Immunity.2013 PMID.24138885                                  | 0.54 | 0.44 |
| Bcells.IL10.Plus Lin JImmunol.2014 PMID.25080484                                      | 0.53 | 0.58 |
| MDSC.Neutrophil Youn LeukocBiol.2012 PMID.21954284                                    | 0.53 | 0.59 |
| Tcells.Regulatory.Tregs CIBERSORT NatMethods.2015 PMID.25822800                       | 0.53 | 0.54 |
| Dendritic.cells Bindea Immunity.2013 PMID.24138885                                    | 0.53 | 0.57 |
| Tcells.NK.Metagene Miller GenomeBiol.2013 PMID.23618380                               | 0.53 | 0.57 |
| Bcells Garber CellMolGastroenterolHepatol.2017 PMID.28508029                          | 0.53 | 0.52 |
| Bcells.Memory CIBERSORT NatMethods.2015 PMID.25822800                                 | 0.53 | 0.55 |
| Tcells.Follicular.Helper Bindea Immunity.2013 PMID.24138885                           | 0.53 | 0.62 |
| Tcells.MCP Petitprez Nature.2020 PMID.31942077                                        | 0.53 | 0.58 |



|                                                                                        |      |      |
|----------------------------------------------------------------------------------------|------|------|
| Immune.HLA.D TCGA.BRCA.1198 JCI.2020 PMID.32573490                                     | 0.53 | 0.59 |
| Tcells.CD4.Effector.Memory Charoentong CellRep.2017 PMID.28052254                      | 0.53 | 0.57 |
| Immune.Cell.Content Verhaak NatCommun.2013 PMID.24113773                               | 0.53 | 0.57 |
| Tcells.CD8 CIBERSORT NatMethods.2015 PMID.25822800                                     | 0.53 | 0.57 |
| IFN.Pathway ImSig.Nirmal CancerImmunolRes.2018 PMID.30266715                           | 0.53 | 0.48 |
| Macrophages.ImmuneProfiles.Mouse.Human Shay PNAS.2013 PMID.23382184                    | 0.53 | 0.58 |
| NK.Activated CIBERSORT NatMethods.2015 PMID.25822800                                   | 0.53 | 0.58 |
| Tcells.Follicular.Helper CIBERSORT NatMethods.2015 PMID.25822800                       | 0.53 | 0.57 |
| Serum.Response.Up TCGA Immunity.2018 PMID.29628290                                     | 0.53 | 0.48 |
| Dendritic.cells.Resting CIBERSORT NatMethods.2015 PMID.25822800                        | 0.53 | 0.61 |
| Eosinophils CIBERSORT NatMethods.2015 PMID.25822800                                    | 0.53 | 0.48 |
| Tcells.Follicular.Helper Charoentong CellRep.2017 PMID.28052254                        | 0.53 | 0.54 |
| Tcells.CD4.Central.Memory Charoentong CellRep.2017 PMID.28052254                       | 0.53 | 0.56 |
| Neutrophils.MCP Petitprez Nature.2020 PMID.31942077                                    | 0.53 | 0.52 |
| Tcells.Gamma.Delta Bindea Immunity.2013 PMID.24138885                                  | 0.53 | 0.49 |
| Immunosuppression Petitprez Nature.2020 PMID.31942077                                  | 0.53 | 0.54 |
| Tcells.CD4.Memory.Resting CIBERSORT NatMethods.2015 PMID.25822800                      | 0.53 | 0.55 |
| Bcells.ImmuneProfiles.Mouse.Human Shay PNAS.2013 PMID.23382184                         | 0.53 | 0.53 |
| Monocytes..Dendritic.cell.Metagene Miller GenomeBiol.2013 PMID.23618380                | 0.53 | 0.59 |
| Immune.CD19 TCGA.BRCA.1198 JCI.2020 PMID.32573490                                      | 0.53 | 0.56 |
| Immune.CD34.TIE1 TCGA.BRCA.1198 JCI.2020 PMID.32573490                                 | 0.53 | 0.60 |
| Tcells.CD8.MCP Petitprez Nature.2020 PMID.31942077                                     | 0.53 | 0.54 |
| Tcells.ImmuneProfiles.Mouse.Human Shay PNAS.2013 PMID.23382184                         | 0.53 | 0.53 |
| HCK Rody BreastCancerResearch.2008 PMID.19272155                                       | 0.53 | 0.57 |
| CTLA4.Pathway GSEA.BIOCARTA ProcNatlAcadSciUSA.2005 PMID.16199517                      | 0.53 | 0.59 |
| Tcells.Th1.cells Charoentong CellRep.2017 PMID.28052254                                | 0.53 | 0.58 |
| Tcells.Gamma.Delta TCGA Immunity.2018 PMID.29628290                                    | 0.53 | 0.49 |
| Immune.HLA.A.F TCGA.BRCA.1198 JCI.2020 PMID.32573490                                   | 0.53 | 0.58 |
| Tcells.Regulatory Charoentong CellRep.2017 PMID.28052254                               | 0.53 | 0.58 |
| Tcells.CD8.Exhausted.Anti.PDL1.vs.Control.Metagene.1 Pauken Science.2016 PMID.27789795 | 0.53 | 0.51 |
| Immune.CD4.CD53.CD84.BTK TCGA.BRCA.1198 JCI.2020 PMID.32573490                         | 0.53 | 0.58 |
| Macrophages.M2 CIBERSORT NatMethods.2015 PMID.25822800                                 | 0.53 | 0.60 |
| Tcells Bindea Immunity.2013 PMID.24138885                                              | 0.53 | 0.56 |

|                                                                                                |      |      |
|------------------------------------------------------------------------------------------------|------|------|
| Monocytes ImSig.Nirmal CancerImmunolRes.2018<br>PMID.30266715                                  | 0.53 | 0.40 |
| Macrophages.Monocytes.CSF1.Response Beck CCR.2009<br>PMID..19188147                            | 0.53 | 0.58 |
| Macrophages Bindea Immunity.2013 PMID.24138885                                                 | 0.53 | 0.57 |
| Dendritic.cells.Immature. Bindea Immunity.2013 PMID.24138885                                   | 0.53 | 0.48 |
| Dendritic.cells.Immature. Charoentong CellRep.2017<br>PMID.28052254                            | 0.52 | 0.42 |
| Tcells.CD8 Bindea Immunity.2013 PMID.24138885                                                  | 0.52 | 0.61 |
| Cytotoxic.Lymphocytes.MCP Petitprez Nature.2020<br>PMID.31942077                               | 0.52 | 0.58 |
| MDSC.Tumor Schlecker JImmunol.2012 PMID.23152559                                               | 0.52 | 0.55 |
| NK.CD56dim Charoentong CellRep.2017 PMID.28052254                                              | 0.52 | 0.60 |
| Tcells.Gamma.Delta Charoentong CellRep.2017 PMID.28052254                                      | 0.52 | 0.51 |
| NK.MCP Helmink Nature.2020 PMID.31942077                                                       | 0.52 | 0.48 |
| MHC.24genes Forero CancerImmunolRes.2016 PMID.26980599                                         | 0.52 | 0.52 |
| Bcells.Tcells.Cooperation Hollern Cell.2019 PMID.31730857                                      | 0.52 | 0.55 |
| Immune.14 Perez JCO.2015 PMID.2560586                                                          | 0.52 | 0.52 |
| MHC.I Rody BreastCancerResearch.2008 PMID.19272155                                             | 0.52 | 0.62 |
| IFNg.Module11 Gatza ProcNatlAcadSciUSA.2010<br>PMID.20335537                                   | 0.52 | 0.53 |
| Bcells.IL10.Minus Lin JImmunol.2014 PMID.25080484                                              | 0.51 | 0.46 |
| Neutrophils ImSig.Nirmal CancerImmunolRes.2018<br>PMID.30266715                                | 0.51 | 0.59 |
| NK.ImmuneProfiles.Mouse.Human Shay PNAS.2013<br>PMID.23382184                                  | 0.51 | 0.48 |
| Immune.Hot.vs.Cold.CD8 Cabrita Nature.2020 PMID.31942071                                       | 0.51 | 0.58 |
| Macrophages.M2 Ghassabeh Blood.2006 PMID.16556895                                              | 0.51 | 0.53 |
| Monocytes CIBERSORT NatMethods.2015 PMID.25822800                                              | 0.51 | 0.59 |
| Mast.cells.Resting CIBERSORT NatMethods.2015<br>PMID.25822800                                  | 0.51 | 0.52 |
| Cytolytic.Activity Rooney Cell.2015 PMID.25594174                                              | 0.51 | 0.55 |
| Plasmacytoid.Dendritic.cell Charoentong CellRep.2017<br>PMID.28052254                          | 0.51 | 0.63 |
| IFNa.Module10 Gatza ProcNatlAcadSciUSA.2010<br>PMID.20335537                                   | 0.51 | 0.51 |
| IFN.Cluster.GSEA.GP11 Fan BMCMedGenomics.2011<br>PMID.21214954                                 | 0.51 | 0.51 |
| Tcells.Regulatory.cell.2gene Petitprez Nature.2020<br>PMID.31942077                            | 0.51 | 0.45 |
| Influenza.11genes Khatri Immunity.2015 PMID.26682989                                           | 0.51 | 0.52 |
| Wound.Healing Chang PlosBiol.2004 PMID.14737219                                                | 0.50 | 0.50 |
| Tcells.Bcell.KEGG.hematopoietic.cell.lineage GSEA.GP2<br>ProcNatlAcadSciUSA.2005 PMID.16199517 | 0.50 | 0.52 |
| Mast.cell Charoentong CellRep.2017 PMID.28052254                                               | 0.50 | 0.50 |
| Granulocytes.ImmuneProfiles.Mouse.Human Shay PNAS.2013<br>PMID.23382184                        | 0.50 | 0.56 |
| Macrophages ImSig.Nirmal CancerImmunolRes.2018<br>PMID.30266715                                | 0.49 | 0.60 |

Using CALGB 40601 as train set, the average AUC of the different models was calculated across all the resamples using 10-fold cross validation. A second AUC was calculated using PAMELA as an external validation set.

**eTable 7. Association of Tumor-Infiltrating Lymphocytes (TILs) and Immune Gene Expression Signatures (iGES) With Event-Free Survival (EFS) in CALGB 40601**

| <b>Signature</b>                                                                      | <b>HR</b> | <b>Lower CI</b> | <b>Upper CI</b> | <b>P-value</b> | <b>AIC</b> |
|---------------------------------------------------------------------------------------|-----------|-----------------|-----------------|----------------|------------|
| Bcells.Plasma.cells.Metagene Miller GenomeBiol.2013 PMID.23618380                     | 0.55      | 0.42            | 0.73            | 0.007          | 401.97     |
| Bcells.Plasma.cells.52genes Miller GenomeBiol.2013 PMID.23618380                      | 0.56      | 0.42            | 0.74            | 0.007          | 403.55     |
| Ig TCGA.BRCA.1198 Cell.2015 PMID.26451490                                             | 0.56      | 0.42            | 0.75            | 0.007          | 403.91     |
| IgG Rody BreastCancerResearch.2008 PMID.19272155                                      | 0.60      | 0.45            | 0.80            | 0.02           | 406.92     |
| IGG.Cluster Fan BMCMedGenomics.2011 PMID.21214954                                     | 0.59      | 0.44            | 0.80            | 0.02           | 406.97     |
| Immune.14 Perez JCO.2015 PMID.2560586                                                 | 0.60      | 0.45            | 0.81            | 0.02           | 407.17     |
| Immune1 TCGA.BRCA.1198 JCI.2020 PMID.32573490                                         | 0.59      | 0.44            | 0.80            | 0.02           | 407.03     |
| Cytotoxic.Lymphocytes.MCP Petitprez Nature.2020 PMID.31942077                         | 0.61      | 0.45            | 0.83            | 0.04           | 408.82     |
| Plasma.cells ImSig.Nirmal CancerImmunolRes.2018 PMID.30266715                         | 0.64      | 0.49            | 0.85            | 0.04           | 409.32     |
| MHC.24genes Forero CancerImmunolRes.2016 PMID.26980599                                | 0.59      | 0.42            | 0.82            | 0.04           | 408.55     |
| Tcells.Follicular.Helper CIBERSORT NatMethods.2015 PMID.25822800                      | 0.61      | 0.44            | 0.83            | 0.04           | 408.97     |
| Bcells.Tcells.Cooperation Hollern Cell.2019 PMID.31730857                             | 0.62      | 0.46            | 0.84            | 0.04           | 408.91     |
| TLS.High.In.Response.MCP Helmkink Nature.2020 PMID.31942075                           | 0.63      | 0.47            | 0.84            | 0.04           | 409.27     |
| Immune.87 Perez JCO.2015 PMID.2560586                                                 | 0.62      | 0.46            | 0.85            | 0.04           | 409.41     |
| Tcells.CD8.MCP Petitprez Nature.2020 PMID.31942077                                    | 0.60      | 0.43            | 0.84            | 0.04           | 409.44     |
| Tcells.CD4.Naive CIBERSORT NatMethods.2015 PMID.25822800                              | 0.64      | 0.47            | 0.86            | 0.04           | 409.78     |
| Bcells.Cluster Iglesia CCR.2014 PMID.24916698                                         | 0.62      | 0.45            | 0.85            | 0.04           | 409.39     |
| Tcells.Cluster Iglesia CCR.2014 PMID.24916698                                         | 0.63      | 0.46            | 0.86            | 0.04           | 410.00     |
| Tcells.CD8 CIBERSORT NatMethods.2015 PMID.25822800                                    | 0.63      | 0.46            | 0.86            | 0.04           | 410.11     |
| Tcells.Gamma.Delta CIBERSORT NatMethods.2015 PMID.25822800                            | 0.64      | 0.48            | 0.87            | 0.04           | 410.39     |
| NK ImSig.Nirmal CancerImmunolRes.2018 PMID.30266715                                   | 0.63      | 0.46            | 0.87            | 0.04           | 410.40     |
| PD1.Signaling.Reactome GSEA ProcNatlAcadSciUSA.2005 PMID.16199517                     | 0.63      | 0.46            | 0.87            | 0.04           | 410.40     |
| Tcells.Bcells.Lymphocyte.Infiltration Calabro BreastCancerResTreat.2009 PMID.18592372 | 0.63      | 0.46            | 0.87            | 0.04           | 410.33     |
| Lymphocyte.Infiltration.Expression.Score TCGA Immunity.2018 PMID.29628290             | 0.63      | 0.46            | 0.87            | 0.04           | 410.33     |

|                                                                         |      |      |      |      |        |
|-------------------------------------------------------------------------|------|------|------|------|--------|
| TLS.Tumors.w.TLS.and.CD8.vs.CD8.alone Cabrita Nature.2020 PMID.31942071 | 0.63 | 0.45 | 0.87 | 0.04 | 410.21 |
| Tcells.CD8.Activated Charoentong CellRep.2017 PMID.28052254             | 0.65 | 0.47 | 0.88 | 0.04 | 410.91 |
| TLS.Hallmark Cabrita Nature.2020 PMID.31942071                          | 0.63 | 0.46 | 0.87 | 0.04 | 410.83 |
| Immune.CD8.GZMK TCGA.BRCA.1198 JCI.2020 PMID.32573490                   | 0.64 | 0.47 | 0.88 | 0.04 | 410.73 |
| CD8.Cluster Iglesia CCR.2014 PMID.24916698                              | 0.65 | 0.47 | 0.88 | 0.04 | 410.82 |
| Tcells.CD4.Memory.Resting CIBERSORT NatMethods.2015 PMID.25822800       | 0.64 | 0.47 | 0.88 | 0.04 | 410.81 |
| Tcells.Regulatory.Tregs CIBERSORT NatMethods.2015 PMID.25822800         | 0.65 | 0.48 | 0.89 | 0.04 | 410.98 |
| NK.CD56dim Charoentong CellRep.2017 PMID.28052254                       | 1.51 | 1.12 | 2.03 | 0.04 | 410.92 |
| CTLA4.Pathway GSEA.BIOCARTA ProcNatlAcadSciUSA.2005 PMID.16199517       | 0.65 | 0.48 | 0.89 | 0.04 | 411.16 |
| Immune.CD19 TCGA.BRCA.1198 JCI.2020 PMID.32573490                       | 0.63 | 0.45 | 0.88 | 0.04 | 410.74 |
| Bcells.Activated Charoentong CellRep.2017 PMID.28052254                 | 0.65 | 0.47 | 0.89 | 0.04 | 411.10 |
| NK.Resting CIBERSORT NatMethods.2015 PMID.25822800                      | 0.64 | 0.46 | 0.89 | 0.04 | 411.14 |
| Bcells.Memory CIBERSORT NatMethods.2015 PMID.25822800                   | 0.64 | 0.47 | 0.89 | 0.04 | 411.21 |

Cox regression models for EFS prediction in CALGB 40601 have been adjusted by treatment arm. Only the models significantly associated with EFS with a p-value <0.05 are shown. P-values are adjusted for multiple testing using a Benjamini & Hochberg method to control the False Discovery Rate.

**eTable 8. Association of Tumor-Infiltrating Lymphocytes (TILs) as a Continuous Variable and Immune Gene Expression Signatures (iGES) With Event-Free Survival (EFS) in CALGB 40601**

Comparative analysis of nested multivariable Cox regression models.

| Signature: Plasma.cells ImSig.Nirmal CancerImmunoIRes.2018 PMID.30266715    |                        |            |            |                      |        |                                                     |
|-----------------------------------------------------------------------------|------------------------|------------|------------|----------------------|--------|-----------------------------------------------------|
| Model                                                                       | Features               | HR         | 95% CI     | p-value <sup>1</sup> | AIC    | LR p-value <sup>2</sup>                             |
| Model 1                                                                     | THL vs. TH             | 0.34       | 0.14, 0.78 | <b>0.01</b>          | 395.68 | -                                                   |
|                                                                             | TL vs. TH              | 1.27       | 0.62, 2.60 | 0.51                 |        |                                                     |
|                                                                             | HR (pos vs. neg)       | 1.86       | 0.94, 3.69 | 0.08                 |        |                                                     |
|                                                                             | Stage (III vs. II)     | 2.03       | 1.07, 3.87 | <b>0.03</b>          |        |                                                     |
|                                                                             | pCR (pCR vs. RD)       | 0.22       | 0.10, 0.48 | <b>&lt;0.001</b>     |        |                                                     |
|                                                                             | HER2-E vs. Other       | 4.2        | 1.97, 8.96 | <b>&lt;0.001</b>     |        |                                                     |
| Model 2                                                                     | THL vs. TH             | 0.31       | 0.13, 0.73 | <b>0.007</b>         | 395.31 | Model 2 vs. Model 1<br>LRT p-value 0.12             |
|                                                                             | TL vs. TH              | 1.3        | 0.63, 2.67 | 0.48                 |        |                                                     |
|                                                                             | HR (pos vs. neg)       | 1.85       | 0.93, 3.69 | 0.08                 |        |                                                     |
|                                                                             | Stage (III vs. II)     | 1.95       | 1.02, 3.71 | <b>0.04</b>          |        |                                                     |
|                                                                             | pCR (pCR vs. RD)       | 0.24       | 0.11, 0.54 | <b>&lt;0.001</b>     |        |                                                     |
|                                                                             | HER2-E vs. not         | 4.53       | 2.11, 9.73 | <b>&lt;0.001</b>     |        |                                                     |
| TILs (continuous)                                                           | 0.99                   | 0.97, 1.00 | 0.14       |                      |        |                                                     |
| Model 3                                                                     | THL vs. TH             | 0.3        | 0.13, 0.71 | <b>0.006</b>         | 388.34 | Model 3 vs. Model 1<br>LRT p-value <b>&lt;0.001</b> |
|                                                                             | TL vs. TH              | 1.55       | 0.74, 3.26 | 0.24                 |        |                                                     |
|                                                                             | HR (pos vs. neg)       | 1.84       | 0.93, 3.63 | 0.08                 |        |                                                     |
|                                                                             | Stage (III vs. II)     | 2.04       | 1.07, 3.89 | <b>0.03</b>          |        |                                                     |
|                                                                             | pCR (pCR vs. RD)       | 0.32       | 0.14, 0.74 | <b>0.007</b>         |        |                                                     |
|                                                                             | HER2-E vs. not         | 5.43       | 2.47, 11.9 | <b>&lt;0.001</b>     |        |                                                     |
|                                                                             | Signature (cont)       | 0.59       | 0.42, 0.82 | <b>0.002</b>         |        |                                                     |
| Model 4                                                                     | THL vs. TH             | 0.3        | 0.13, 0.71 | <b>0.006</b>         | 390.32 | Model 4 vs. Model 2<br>LRT p-value <b>0.008</b>     |
|                                                                             | TL vs. TH              | 1.56       | 0.74, 3.29 | 0.24                 |        |                                                     |
|                                                                             | HR (pos vs. neg)       | 1.84       | 0.93, 3.62 | 0.08                 |        |                                                     |
|                                                                             | Stage (III vs. II)     | 2.05       | 1.07, 3.91 | <b>0.03</b>          |        |                                                     |
|                                                                             | pCR (pCR vs. RD)       | 0.32       | 0.14, 0.74 | <b>0.007</b>         |        | Model 4 vs. Model 3<br>LRT p-value 0.90             |
|                                                                             | HER2-E vs. not         | 5.43       | 2.47, 12.0 | <b>&lt;0.001</b>     |        |                                                     |
|                                                                             | TILs (continuous)      | 1          | 0.98, 1.02 | 0.90                 |        |                                                     |
|                                                                             | Signature (continuous) | 0.58       | 0.39, 0.86 | <b>0.007</b>         |        |                                                     |
| Signature: Bcells.Plasma.cells.52genes Miller GenomeBiol.2013 PMID.23618380 |                        |            |            |                      |        |                                                     |
| Model                                                                       | Features               | HR         | 95% CI     | p-value <sup>1</sup> | AIC    | LR p-value <sup>2</sup>                             |
| Model 1                                                                     | THL vs. TH             | 0.34       | 0.14, 0.78 | <b>0.01</b>          | 395.68 | -                                                   |
|                                                                             | TL vs. TH              | 1.27       | 0.62, 2.60 | 0.51                 |        |                                                     |
|                                                                             | HR (pos vs. neg)       | 1.86       | 0.94, 3.69 | 0.08                 |        |                                                     |
|                                                                             | Stage (III vs. II)     | 2.03       | 1.07, 3.87 | <b>0.03</b>          |        |                                                     |
|                                                                             | pCR (pCR vs. RD)       | 0.22       | 0.10, 0.48 | <b>&lt;0.001</b>     |        |                                                     |

|                                                             | HER2-E vs. Other       | 4.2       | 1.97, 8.96    | <b>&lt;0.001</b>           |            |                                                     |
|-------------------------------------------------------------|------------------------|-----------|---------------|----------------------------|------------|-----------------------------------------------------|
| <b>Model 2</b>                                              | THL vs. TH             | 0.31      | 0.13, 0.73    | <b>0.007</b>               | 395.31     | Model 2 vs. Model 1<br>LRT p-value 0.12             |
|                                                             | TL vs. TH              | 1.3       | 0.63, 2.67    | 0.48                       |            |                                                     |
|                                                             | HR (pos vs. neg)       | 1.85      | 0.93, 3.69    | 0.08                       |            |                                                     |
|                                                             | Stage (III vs. II)     | 1.95      | 1.02, 3.71    | <b>0.04</b>                |            |                                                     |
|                                                             | pCR (pCR vs. RD)       | 0.24      | 0.11, 0.54    | <b>&lt;0.001</b>           |            |                                                     |
|                                                             | HER2-E vs. not         | 4.53      | 2.11, 9.73    | <b>&lt;0.001</b>           |            |                                                     |
|                                                             | TILs (continuous)      | 0.99      | 0.97, 1.00    | 0.14                       |            |                                                     |
| <b>Model 3</b>                                              | THL vs. TH             | 0.29      | 0.12, 0.68    | <b>0.005</b>               | 385.04     | Model 3 vs. Model 1<br>LRT p-value <b>0.004</b>     |
|                                                             | TL vs. TH              | 1.57      | 0.75, 3.27    | 0.23                       |            |                                                     |
|                                                             | HR (pos vs. neg)       | 1.36      | 0.68, 2.73    | 0.39                       |            |                                                     |
|                                                             | Stage (III vs. II)     | 2.2       | 1.15, 4.19    | <b>0.02</b>                |            |                                                     |
|                                                             | pCR (pCR vs. RD)       | 0.34      | 0.15, 0.76    | <b>0.008</b>               |            |                                                     |
|                                                             | HER2-E vs. not         | 4.73      | 2.20, 10.1    | <b>&lt;0.001</b>           |            |                                                     |
|                                                             | Signature (cont)       | 0.53      | 0.38, 0.75    | <b>&lt;0.001</b>           |            |                                                     |
| <b>Model 4</b>                                              | THL vs. TH             | 0.3       | 0.13, 0.71    | <b>0.006</b>               | 386.88     | Model 4 vs. Model 2<br>LRT p-value <b>0.001</b>     |
|                                                             | TL vs. TH              | 1.6       | 0.76, 3.36    | 0.22                       |            |                                                     |
|                                                             | HR (pos vs. neg)       | 1.34      | 0.66, 2.69    | 0.42                       |            |                                                     |
|                                                             | Stage (III vs. II)     | 2.23      | 1.17, 4.26    | <b>0.02</b>                |            |                                                     |
|                                                             | pCR (pCR vs. RD)       | 0.33      | 0.15, 0.75    | <b>0.008</b>               |            | Model 4 vs. Model 3<br>LRT p-value 0.69             |
|                                                             | HER2-E vs. not         | 4.68      | 2.17, 10.1    | <b>&lt;0.001</b>           |            |                                                     |
|                                                             | TILs (continuous)      | 1         | 0.99, 1.02    | 0.68                       |            |                                                     |
|                                                             | Signature (continuous) | 0.51      | 0.34, 0.76    | <b>&lt;0.001</b>           |            |                                                     |
| <b>Signature: Ig TCGA.BRCA.1198 Cell.2015 PMID.26451490</b> |                        |           |               |                            |            |                                                     |
| <b>Model</b>                                                | <b>Features</b>        | <b>HR</b> | <b>95% CI</b> | <b>p-value<sup>1</sup></b> | <b>AIC</b> | <b>LR p-value<sup>2</sup></b>                       |
| <b>Model 1</b>                                              | THL vs. TH             | 0.34      | 0.14, 0.78    | <b>0.01</b>                | 395.68     | -                                                   |
|                                                             | TL vs. TH              | 1.27      | 0.62, 2.60    | 0.51                       |            |                                                     |
|                                                             | HR (pos vs. neg)       | 1.86      | 0.94, 3.69    | 0.08                       |            |                                                     |
|                                                             | Stage (III vs. II)     | 2.03      | 1.07, 3.87    | <b>0.03</b>                |            |                                                     |
|                                                             | pCR (pCR vs. RD)       | 0.22      | 0.10, 0.48    | <b>&lt;0.001</b>           |            |                                                     |
|                                                             | HER2-E vs. Other       | 4.2       | 1.97, 8.96    | <b>&lt;0.001</b>           |            |                                                     |
| <b>Model 2</b>                                              | THL vs. TH             | 0.31      | 0.13, 0.73    | <b>0.007</b>               | 395.31     | Model 2 vs. Model 1<br>LRT p-value 0.12             |
|                                                             | TL vs. TH              | 1.3       | 0.63, 2.67    | 0.48                       |            |                                                     |
|                                                             | HR (pos vs. neg)       | 1.85      | 0.93, 3.69    | 0.08                       |            |                                                     |
|                                                             | Stage (III vs. II)     | 1.95      | 1.02, 3.71    | <b>0.04</b>                |            |                                                     |
|                                                             | pCR (pCR vs. RD)       | 0.24      | 0.11, 0.54    | <b>&lt;0.001</b>           |            |                                                     |
|                                                             | HER2-E vs. not         | 4.53      | 2.11, 9.73    | <b>&lt;0.001</b>           |            |                                                     |
|                                                             | TILs (continuous)      | 0.99      | 0.97, 1.00    | 0.14                       |            |                                                     |
| <b>Model 3</b>                                              | THL vs. TH             | 0.31      | 0.13, 0.73    | <b>0.007</b>               | 384.82     | Model 3 vs. Model 1<br>LRT p-value <b>&lt;0.001</b> |
|                                                             | TL vs. TH              | 1.71      | 0.81, 3.59    | 0.16                       |            |                                                     |
|                                                             | HR (pos vs. neg)       | 1.48      | 0.74, 2.93    | 0.27                       |            |                                                     |
|                                                             | Stage (III vs. II)     | 2.34      | 1.22, 4.47    | <b>0.01</b>                |            |                                                     |

|                                                                 | pCR (pCR vs. RD)       | 0.34      | 0.15, 0.77    | <b>0.01</b>                |            |                                                 |
|-----------------------------------------------------------------|------------------------|-----------|---------------|----------------------------|------------|-------------------------------------------------|
|                                                                 | HER2-E vs. not         | 4.81      | 2.24, 10.3    | <b>&lt;0.001</b>           |            |                                                 |
|                                                                 | Signature (cont)       | 0.53      | 0.37, 0.75    | <b>&lt;0.001</b>           |            |                                                 |
| <b>Model 4</b>                                                  | THL vs. TH             | 0.32      | 0.14, 0.75    | <b>0.009</b>               | 386.66     | Model 4 vs. Model 2<br>LRT p-value <b>0.001</b> |
|                                                                 | TL vs. TH              | 1.75      | 0.82, 3.72    | 0.15                       |            |                                                 |
|                                                                 | HR (pos vs. neg)       | 1.47      | 0.74, 2.90    | 0.27                       |            |                                                 |
|                                                                 | Stage (III vs. II)     | 2.38      | 1.24, 4.59    | <b>0.01</b>                |            |                                                 |
|                                                                 | pCR (pCR vs. RD)       | 0.34      | 0.15, 0.76    | <b>0.009</b>               |            | Model 4 vs. Model 3<br>LRT p-value 0.69         |
|                                                                 | HER2-E vs. not         | 4.77      | 2.22, 10.2    | <b>&lt;0.001</b>           |            |                                                 |
|                                                                 | TILs (continuous)      | 1         | 0.99, 1.02    | 0.69                       |            |                                                 |
|                                                                 | Signature (continuous) | 0.5       | 0.33, 0.76    | <b>0.001</b>               |            |                                                 |
| <b>Signature: Immune1 TCGA.BRCA.1198 JCI.2020 PMID.32573490</b> |                        |           |               |                            |            |                                                 |
| <b>Model</b>                                                    | <b>Features</b>        | <b>HR</b> | <b>95% CI</b> | <b>p-value<sup>1</sup></b> | <b>AIC</b> | <b>LR p-value<sup>2</sup></b>                   |
| <b>Model 1</b>                                                  | THL vs. TH             | 0.34      | 0.14, 0.78    | <b>0.01</b>                | 395.68     | -                                               |
|                                                                 | TL vs. TH              | 1.27      | 0.62, 2.60    | 0.51                       |            |                                                 |
|                                                                 | HR (pos vs. neg)       | 1.86      | 0.94, 3.69    | 0.08                       |            |                                                 |
|                                                                 | Stage (III vs. II)     | 2.03      | 1.07, 3.87    | <b>0.03</b>                |            |                                                 |
|                                                                 | pCR (pCR vs. RD)       | 0.22      | 0.10, 0.48    | <b>&lt;0.001</b>           |            |                                                 |
|                                                                 | HER2-E vs. Other       | 4.2       | 1.97, 8.96    | <b>&lt;0.001</b>           |            |                                                 |
| <b>Model 2</b>                                                  | THL vs. TH             | 0.31      | 0.13, 0.73    | <b>0.007</b>               | 395.31     | Model 2 vs. Model 1<br>LRT p-value 0.12         |
|                                                                 | TL vs. TH              | 1.3       | 0.63, 2.67    | 0.48                       |            |                                                 |
|                                                                 | HR (pos vs. neg)       | 1.85      | 0.93, 3.69    | 0.08                       |            |                                                 |
|                                                                 | Stage (III vs. II)     | 1.95      | 1.02, 3.71    | <b>0.04</b>                |            |                                                 |
|                                                                 | pCR (pCR vs. RD)       | 0.24      | 0.11, 0.54    | <b>&lt;0.001</b>           |            |                                                 |
|                                                                 | HER2-E vs. not         | 4.53      | 2.11, 9.73    | <b>&lt;0.001</b>           |            |                                                 |
|                                                                 | TILs (continuous)      | 0.99      | 0.97, 1.00    | 0.14                       |            |                                                 |
| <b>Model 3</b>                                                  | THL vs. TH             | 0.3       | 0.13, 0.71    | <b>0.006</b>               | 389.43     | Model 3 vs. Model 1<br>LRT p-value <b>0.004</b> |
|                                                                 | TL vs. TH              | 1.49      | 0.72, 3.11    | 0.29                       |            |                                                 |
|                                                                 | HR (pos vs. neg)       | 1.47      | 0.73, 2.95    | 0.28                       |            |                                                 |
|                                                                 | Stage (III vs. II)     | 2.1       | 1.10, 4.00    | <b>0.03</b>                |            |                                                 |
|                                                                 | pCR (pCR vs. RD)       | 0.31      | 0.14, 0.71    | <b>0.005</b>               |            |                                                 |
|                                                                 | HER2-E vs. not         | 4.41      | 2.07, 9.38    | <b>&lt;0.001</b>           |            |                                                 |
|                                                                 | Signature (cont)       | 0.6       | 0.43, 0.85    | <b>0.004</b>               |            |                                                 |
| <b>Model 4</b>                                                  | THL vs. TH             | 0.3       | 0.13, 0.71    | <b>0.006</b>               | 391.41     | Model 4 vs. Model 2<br>LRT p-value <b>0.02</b>  |
|                                                                 | TL vs. TH              | 1.5       | 0.72, 3.14    | 0.28                       |            |                                                 |
|                                                                 | HR (pos vs. neg)       | 1.46      | 0.72, 2.95    | 0.30                       |            |                                                 |
|                                                                 | Stage (III vs. II)     | 2.11      | 1.10, 4.03    | <b>0.02</b>                |            |                                                 |
|                                                                 | pCR (pCR vs. RD)       | 0.31      | 0.14, 0.71    | <b>0.005</b>               |            | Model 4 vs. Model 3<br>LRT p-value 0.88         |
|                                                                 | HER2-E vs. not         | 4.39      | 2.06, 9.36    | <b>&lt;0.001</b>           |            |                                                 |
|                                                                 | TILs (continuous)      | 1         | 0.98, 1.02    | 0.88                       |            |                                                 |
|                                                                 | Signature (continuous) | 0.59      | 0.39, 0.90    | <b>0.014</b>               |            |                                                 |



| Signature: IgG Rody BreastCancerResearch.2008 PMID.19272155 |                        |      |            |                      |        |                                                 |
|-------------------------------------------------------------|------------------------|------|------------|----------------------|--------|-------------------------------------------------|
| Model                                                       | Features               | HR   | 95% CI     | p-value <sup>1</sup> | AIC    | LR p-value <sup>2</sup>                         |
| Model 1                                                     | THL vs. TH             | 0.34 | 0.14, 0.78 | <b>0.011</b>         | 395.68 | -                                               |
|                                                             | TL vs. TH              | 1.27 | 0.62, 2.60 | 0.51                 |        |                                                 |
|                                                             | HR (pos vs. neg)       | 1.86 | 0.94, 3.69 | 0.08                 |        |                                                 |
|                                                             | Stage (III vs. II)     | 2.03 | 1.07, 3.87 | <b>0.03</b>          |        |                                                 |
|                                                             | pCR (pCR vs. RD)       | 0.22 | 0.10, 0.48 | <b>&lt;0.001</b>     |        |                                                 |
|                                                             | HER2-E vs. Other       | 4.2  | 1.97, 8.96 | <b>&lt;0.001</b>     |        |                                                 |
| Model 2                                                     | THL vs. TH             | 0.31 | 0.13, 0.73 | <b>0.007</b>         | 395.31 | Model 2 vs. Model 1<br>LRT p-value 0.12         |
|                                                             | TL vs. TH              | 1.3  | 0.63, 2.67 | 0.48                 |        |                                                 |
|                                                             | HR (pos vs. neg)       | 1.85 | 0.93, 3.69 | 0.08                 |        |                                                 |
|                                                             | Stage (III vs. II)     | 1.95 | 1.02, 3.71 | <b>0.04</b>          |        |                                                 |
|                                                             | pCR (pCR vs. RD)       | 0.24 | 0.11, 0.54 | <b>&lt;0.001</b>     |        |                                                 |
|                                                             | HER2-E vs. not         | 4.53 | 2.11, 9.73 | <b>&lt;0.001</b>     |        |                                                 |
|                                                             | TILs (continuous)      | 0.99 | 0.97, 1.00 | 0.14                 |        |                                                 |
| Model 3                                                     | THL vs. TH             | 0.33 | 0.14, 0.76 | <b>0.009</b>         | 387.85 | Model 3 vs. Model 1<br>LRT p-value <b>0.002</b> |
|                                                             | TL vs. TH              | 1.59 | 0.76, 3.32 | 0.22                 |        |                                                 |
|                                                             | HR (pos vs. neg)       | 1.52 | 0.76, 3.02 | 0.24                 |        |                                                 |
|                                                             | Stage (III vs. II)     | 2.3  | 1.20, 4.40 | <b>0.01</b>          |        |                                                 |
|                                                             | pCR (pCR vs. RD)       | 0.31 | 0.14, 0.69 | <b>0.004</b>         |        |                                                 |
|                                                             | HER2-E vs. not         | 4.71 | 2.20, 10.1 | <b>&lt;0.001</b>     |        |                                                 |
|                                                             | Signature (cont)       | 0.57 | 0.41, 0.81 | <b>0.002</b>         |        |                                                 |
| Model 4                                                     | THL vs. TH             | 0.33 | 0.14, 0.77 | <b>0.01</b>          | 389.85 | Model 4 vs. Model 2<br>LRT p-value <b>0.006</b> |
|                                                             | TL vs. TH              | 1.59 | 0.76, 3.35 | 0.22                 |        | Model 4 vs. Model 3<br>LRT p-value 0.96         |
|                                                             | HR (pos vs. neg)       | 1.51 | 0.76, 3.02 | 0.24                 |        |                                                 |
|                                                             | Stage (III vs. II)     | 2.31 | 1.20, 4.45 | <b>0.01</b>          |        |                                                 |
|                                                             | pCR (pCR vs. RD)       | 0.31 | 0.14, 0.69 | <b>0.004</b>         |        |                                                 |
|                                                             | HER2-E vs. not         | 4.7  | 2.20, 10.1 | <b>&lt;0.001</b>     |        |                                                 |
|                                                             | TILs (continuous)      | 1    | 0.98, 1.02 | 0.96                 |        |                                                 |
|                                                             | Signature (continuous) | 0.57 | 0.38, 0.85 | <b>0.006</b>         |        |                                                 |

CI: confident intervals; EFS: event-free survival; HR: hormone receptor; pCR: pathologic complete response; RD: residual disease; pos: positive; neg: negative; HER2-E: HER2-Enriched; AIC: Akaike Information Criterion; LR: likelihood-ratio test; TILs: tumor infiltrating lymphocytes; IgG: immunoglobulin G; T: weekly paclitaxel; H: trastuzumab; L: lapatinib. <sup>1</sup>Cox regression model p-value; <sup>2</sup>Likelihood-ratio test p-value.

**eTable 9. Association of Tumor-Infiltrating Lymphocytes (TILs) Using a Cutoff of 40% and Immune Gene Expression Signatures (iGES) With Event-Free Survival (EFS) in CALGB 40601**

Comparative analysis of nested multivariable Cox regression models.

| Signature: IGG.Cluster Fan BMC Med Genomics.2011 PMID.21214954 |                         |      |            |                      |        |                                                 |
|----------------------------------------------------------------|-------------------------|------|------------|----------------------|--------|-------------------------------------------------|
| Model                                                          | Features                | HR   | 95% CI     | p-value <sup>1</sup> | AIC    | LR p-value <sup>2</sup>                         |
| <b>Model 1</b>                                                 | THL vs. TH              | 0.34 | 0.14, 0.78 | <b>0.011</b>         | 395.68 | -                                               |
|                                                                | TL vs. TH               | 1.27 | 0.62, 2.60 | 0.511                |        |                                                 |
|                                                                | HR (pos vs. neg)        | 1.86 | 0.94, 3.69 | 0.076                |        |                                                 |
|                                                                | Stage (III vs. II)      | 2.03 | 1.07, 3.87 | <b>0.031</b>         |        |                                                 |
|                                                                | pCR (pCR vs. RD)        | 0.22 | 0.10, 0.48 | <b>&lt;0.001</b>     |        |                                                 |
|                                                                | HER2-E vs. Other        | 4.2  | 1.97, 8.96 | <b>&lt;0.001</b>     |        |                                                 |
| <b>Model 2</b>                                                 | THL vs. TH              | 0.31 | 0.13, 0.73 | <b>0.007</b>         | 394.78 | Model 2 vs. Model 1<br>LRT p-value 0.09         |
|                                                                | TL vs. TH               | 1.27 | 0.62, 2.61 | 0.513                |        |                                                 |
|                                                                | HR (pos vs. neg)        | 1.87 | 0.94, 3.73 | 0.076                |        |                                                 |
|                                                                | Stage (III vs. II)      | 1.92 | 1.01, 3.66 | <b>0.046</b>         |        |                                                 |
|                                                                | pCR (pCR vs. RD)        | 0.25 | 0.11, 0.54 | <b>&lt;0.001</b>     |        |                                                 |
|                                                                | HER2-E vs. not          | 4.51 | 2.10, 9.68 | <b>&lt;0.001</b>     |        |                                                 |
|                                                                | TILs High vs. Low (40%) | 0.49 | 0.20, 1.19 | 0.113                |        |                                                 |
| <b>Model 3</b>                                                 | THL vs. TH              | 0.31 | 0.13, 0.71 | <b>0.006</b>         | 389.97 | Model 3 vs. Model 1<br>LRT p-value <b>0.005</b> |
|                                                                | TL vs. TH               | 1.45 | 0.70, 3.02 | 0.322                |        |                                                 |
|                                                                | HR (pos vs. neg)        | 1.43 | 0.71, 2.90 | 0.319                |        |                                                 |
|                                                                | Stage (III vs. II)      | 2.01 | 1.06, 3.83 | <b>0.033</b>         |        |                                                 |
|                                                                | pCR (pCR vs. RD)        | 0.3  | 0.13, 0.66 | <b>0.003</b>         |        |                                                 |
|                                                                | HER2-E vs. not          | 4.28 | 2.02, 9.08 | <b>&lt;0.001</b>     |        |                                                 |
|                                                                | Signature (cont)        | 0.63 | 0.45, 0.87 | <b>0.006</b>         |        |                                                 |
| <b>Model 4</b>                                                 | THL vs. TH              | 0.3  | 0.13, 0.70 | <b>0.006</b>         | 391.74 | Model 4 vs. Model 2<br>LRT p-value <b>0.03</b>  |
|                                                                | TL vs. TH               | 1.43 | 0.69, 2.99 | 0.339                |        |                                                 |
|                                                                | HR (pos vs. neg)        | 1.46 | 0.72, 2.97 | 0.299                |        |                                                 |
|                                                                | Stage (III vs. II)      | 2    | 1.05, 3.80 | <b>0.035</b>         |        |                                                 |
|                                                                | pCR (pCR vs. RD)        | 0.3  | 0.13, 0.68 | <b>0.004</b>         |        | Model 4 vs. Model 3                             |

|                                                                                 | HER2-E vs. not          | 4.33      | 2.04, 9.21    | <b>&lt;0.001</b>           |            | LRT p-value 0.63                                |
|---------------------------------------------------------------------------------|-------------------------|-----------|---------------|----------------------------|------------|-------------------------------------------------|
|                                                                                 | TILs High vs. Low (40%) | 0.79      | 0.29, 2.14    | 0.639                      |            |                                                 |
|                                                                                 | Signature (continuous)  | 0.65      | 0.45, 0.95    | <b>0.024</b>               |            |                                                 |
| <b>Signature: Plasma.cells ImSig.Nirmal CancerImmunoIRes.2018 PMID.30266715</b> |                         |           |               |                            |            |                                                 |
| <b>Model</b>                                                                    | <b>Features</b>         | <b>HR</b> | <b>95% CI</b> | <b>p-value<sup>1</sup></b> | <b>AIC</b> | <b>LR p-value<sup>2</sup></b>                   |
| <b>Model 1</b>                                                                  | THL vs. TH              | 0.34      | 0.14, 0.78    | <b>0.011</b>               | 395.68     | -                                               |
|                                                                                 | TL vs. TH               | 1.27      | 0.62, 2.60    | 0.511                      |            |                                                 |
|                                                                                 | HR (pos vs. neg)        | 1.86      | 0.94, 3.69    | 0.076                      |            |                                                 |
|                                                                                 | Stage (III vs. II)      | 2.03      | 1.07, 3.87    | <b>0.031</b>               |            |                                                 |
|                                                                                 | pCR (pCR vs. RD)        | 0.22      | 0.10, 0.48    | <b>&lt;0.001</b>           |            |                                                 |
|                                                                                 | HER2-E vs. Other        | 4.2       | 1.97, 8.96    | <b>&lt;0.001</b>           |            |                                                 |
| <b>Model 2</b>                                                                  | THL vs. TH              | 0.31      | 0.13, 0.73    | <b>0.007</b>               | 394.78     | Model 2 vs. Model 1<br>LRT p-value 0.09         |
|                                                                                 | TL vs. TH               | 1.27      | 0.62, 2.61    | 0.513                      |            |                                                 |
|                                                                                 | HR (pos vs. neg)        | 1.87      | 0.94, 3.73    | 0.076                      |            |                                                 |
|                                                                                 | Stage (III vs. II)      | 1.92      | 1.01, 3.66    | <b>0.046</b>               |            |                                                 |
|                                                                                 | pCR (pCR vs. RD)        | 0.25      | 0.11, 0.54    | <b>&lt;0.001</b>           |            |                                                 |
|                                                                                 | HER2-E vs. not          | 4.51      | 2.10, 9.68    | <b>&lt;0.001</b>           |            |                                                 |
|                                                                                 | TILs High vs. Low (40%) | 0.49      | 0.20, 1.19    | 0.113                      |            |                                                 |
| <b>Model 3</b>                                                                  | THL vs. TH              | 0.3       | 0.13, 0.71    | <b>0.006</b>               | 388.34     | Model 3 vs. Model 1<br>LRT p-value <b>0.002</b> |
|                                                                                 | TL vs. TH               | 1.55      | 0.74, 3.26    | 0.243                      |            |                                                 |
|                                                                                 | HR (pos vs. neg)        | 1.84      | 0.93, 3.63    | 0.081                      |            |                                                 |
|                                                                                 | Stage (III vs. II)      | 2.04      | 1.07, 3.89    | <b>0.031</b>               |            |                                                 |
|                                                                                 | pCR (pCR vs. RD)        | 0.32      | 0.14, 0.74    | <b>0.007</b>               |            |                                                 |
|                                                                                 | HER2-E vs. not          | 5.43      | 2.47, 11.9    | <b>&lt;0.001</b>           |            |                                                 |
|                                                                                 | Signature (cont)        | 0.59      | 0.42, 0.82    | <b>0.002</b>               |            |                                                 |
| <b>Model 4</b>                                                                  | THL vs. TH              | 0.3       | 0.13, 0.70    | <b>0.005</b>               | 390.20     | Model 4 vs. Model 2<br>LRT p-value <b>0.01</b>  |
|                                                                                 | TL vs. TH               | 1.54      | 0.73, 3.23    | 0.257                      |            |                                                 |
|                                                                                 | HR (pos vs. neg)        | 1.84      | 0.93, 3.64    | 0.08                       |            |                                                 |
|                                                                                 | Stage (III vs. II)      | 2.03      | 1.06, 3.87    | <b>0.032</b>               |            |                                                 |

|                                                                                    | pCR (pCR vs. RD)        | 0.33 | 0.14, 0.75 | <b>0.008</b>         |        | Model 4 vs. Model 3<br>LRT p-value 0.71             |
|------------------------------------------------------------------------------------|-------------------------|------|------------|----------------------|--------|-----------------------------------------------------|
|                                                                                    | HER2-E vs. not          | 5.4  | 2.46, 11.9 | <b>&lt;0.001</b>     |        |                                                     |
|                                                                                    | TILs High vs. Low (40%) | 0.83 | 0.30, 2.26 | 0.714                |        |                                                     |
|                                                                                    | Signature (continuous)  | 0.61 | 0.42, 0.88 | <b>0.009</b>         |        |                                                     |
| <b>Signature: Bcells.Plasma.cells.52genes Miller GenomeBiol.2013 PMID.23618380</b> |                         |      |            |                      |        |                                                     |
| Model                                                                              | Features                | HR   | 95% CI     | p-value <sup>1</sup> | AIC    | LR p-value <sup>2</sup>                             |
| <b>Model 1</b>                                                                     | THL vs. TH              | 0.34 | 0.14, 0.78 | <b>0.011</b>         | 395.68 | -                                                   |
|                                                                                    | TL vs. TH               | 1.27 | 0.62, 2.60 | 0.511                |        |                                                     |
|                                                                                    | HR (pos vs. neg)        | 1.86 | 0.94, 3.69 | 0.076                |        |                                                     |
|                                                                                    | Stage (III vs. II)      | 2.03 | 1.07, 3.87 | <b>0.031</b>         |        |                                                     |
|                                                                                    | pCR (pCR vs. RD)        | 0.22 | 0.10, 0.48 | <b>&lt;0.001</b>     |        |                                                     |
|                                                                                    | HER2-E vs. Other        | 4.2  | 1.97, 8.96 | <b>&lt;0.001</b>     |        |                                                     |
| <b>Model 2</b>                                                                     | THL vs. TH              | 0.31 | 0.13, 0.73 | <b>0.007</b>         | 394.78 | Model 2 vs. Model 1<br>LRT p-value 0.09             |
|                                                                                    | TL vs. TH               | 1.27 | 0.62, 2.61 | 0.513                |        |                                                     |
|                                                                                    | HR (pos vs. neg)        | 1.87 | 0.94, 3.73 | 0.076                |        |                                                     |
|                                                                                    | Stage (III vs. II)      | 1.92 | 1.01, 3.66 | <b>0.046</b>         |        |                                                     |
|                                                                                    | pCR (pCR vs. RD)        | 0.25 | 0.11, 0.54 | <b>&lt;0.001</b>     |        |                                                     |
|                                                                                    | HER2-E vs. not          | 4.51 | 2.10, 9.68 | <b>&lt;0.001</b>     |        |                                                     |
|                                                                                    | TILs High vs. Low (40%) | 0.49 | 0.20, 1.19 | 0.113                |        |                                                     |
| <b>Model 3</b>                                                                     | THL vs. TH              | 0.29 | 0.12, 0.68 | <b>0.005</b>         | 385.04 | Model 3 vs. Model 1<br>LRT p-value <b>&lt;0.001</b> |
|                                                                                    | TL vs. TH               | 1.57 | 0.75, 3.27 | 0.234                |        |                                                     |
|                                                                                    | HR (pos vs. neg)        | 1.36 | 0.68, 2.73 | 0.388                |        |                                                     |
|                                                                                    | Stage (III vs. II)      | 2.2  | 1.15, 4.19 | <b>0.016</b>         |        |                                                     |
|                                                                                    | pCR (pCR vs. RD)        | 0.34 | 0.15, 0.76 | <b>0.008</b>         |        |                                                     |
|                                                                                    | HER2-E vs. not          | 4.73 | 2.20, 10.1 | <b>&lt;0.001</b>     |        |                                                     |
|                                                                                    | Signature (cont)        | 0.53 | 0.38, 0.75 | <b>&lt;0.001</b>     |        |                                                     |
| <b>Model 4</b>                                                                     | THL vs. TH              | 0.29 | 0.12, 0.68 | <b>0.005</b>         | 387.03 | Model 4 vs. Model 2<br>LRT p-value <b>0.002</b>     |
|                                                                                    | TL vs. TH               | 1.56 | 0.74, 3.27 | 0.243                |        |                                                     |
|                                                                                    | HR (pos vs. neg)        | 1.36 | 0.68, 2.75 | 0.385                |        |                                                     |

|                                                             | Stage (III vs. II)      | 2.19 | 1.15, 4.19 | <b>0.017</b>         |        | Model 4 vs. Model 3<br>LRT p-value 0.92             |
|-------------------------------------------------------------|-------------------------|------|------------|----------------------|--------|-----------------------------------------------------|
|                                                             | pCR (pCR vs. RD)        | 0.34 | 0.15, 0.76 | <b>0.009</b>         |        |                                                     |
|                                                             | HER2-E vs. not          | 4.73 | 2.20, 10.2 | <b>&lt;0.001</b>     |        |                                                     |
|                                                             | TILs High vs. Low (40%) | 0.95 | 0.35, 2.59 | 0.915                |        |                                                     |
|                                                             | Signature (continuous)  | 0.54 | 0.37, 0.78 | <b>0.001</b>         |        |                                                     |
| <b>Signature: Ig TCGA.BRCA.1198 Cell.2015 PMID.26451490</b> |                         |      |            |                      |        |                                                     |
| Model                                                       | Features                | HR   | 95% CI     | p-value <sup>1</sup> | AIC    | LR p-value <sup>2</sup>                             |
| <b>Model 1</b>                                              | THL vs. TH              | 0.34 | 0.14, 0.78 | <b>0.011</b>         | 395.68 | -                                                   |
|                                                             | TL vs. TH               | 1.27 | 0.62, 2.60 | 0.511                |        |                                                     |
|                                                             | HR (pos vs. neg)        | 1.86 | 0.94, 3.69 | 0.076                |        |                                                     |
|                                                             | Stage (III vs. II)      | 2.03 | 1.07, 3.87 | <b>0.031</b>         |        |                                                     |
|                                                             | pCR (pCR vs. RD)        | 0.22 | 0.10, 0.48 | <b>&lt;0.001</b>     |        |                                                     |
|                                                             | HER2-E vs. Other        | 4.2  | 1.97, 8.96 | <b>&lt;0.001</b>     |        |                                                     |
| <b>Model 2</b>                                              | THL vs. TH              | 0.31 | 0.13, 0.73 | <b>0.007</b>         | 394.78 | Model 2 vs. Model 1<br>LRT p-value 0.09             |
|                                                             | TL vs. TH               | 1.27 | 0.62, 2.61 | 0.513                |        |                                                     |
|                                                             | HR (pos vs. neg)        | 1.87 | 0.94, 3.73 | 0.076                |        |                                                     |
|                                                             | Stage (III vs. II)      | 1.92 | 1.01, 3.66 | <b>0.046</b>         |        |                                                     |
|                                                             | pCR (pCR vs. RD)        | 0.25 | 0.11, 0.54 | <b>&lt;0.001</b>     |        |                                                     |
|                                                             | HER2-E vs. not          | 4.51 | 2.10, 9.68 | <b>&lt;0.001</b>     |        |                                                     |
|                                                             | TILs High vs. Low (40%) | 0.49 | 0.20, 1.19 | 0.113                |        |                                                     |
| <b>Model 3</b>                                              | THL vs. TH              | 0.31 | 0.13, 0.73 | <b>0.007</b>         | 384.82 | Model 3 vs. Model 1<br>LRT p-value <b>&lt;0.001</b> |
|                                                             | TL vs. TH               | 1.71 | 0.81, 3.59 | 0.16                 |        |                                                     |
|                                                             | HR (pos vs. neg)        | 1.48 | 0.74, 2.93 | 0.265                |        |                                                     |
|                                                             | Stage (III vs. II)      | 2.34 | 1.22, 4.47 | <b>0.01</b>          |        |                                                     |
|                                                             | pCR (pCR vs. RD)        | 0.34 | 0.15, 0.77 | <b>0.01</b>          |        |                                                     |
|                                                             | HER2-E vs. not          | 4.81 | 2.24, 10.3 | <b>&lt;0.001</b>     |        |                                                     |
|                                                             | Signature (cont)        | 0.53 | 0.37, 0.75 | <b>&lt;0.001</b>     |        |                                                     |
| <b>Model 4</b>                                              | THL vs. TH              | 0.31 | 0.13, 0.73 | <b>0.007</b>         | 386.82 | Model 4 vs. Model 2                                 |
|                                                             | TL vs. TH               | 1.7  | 0.80, 3.61 | 0.169                |        |                                                     |

|                                                                 | HR (pos vs. neg)        | 1.48 | 0.74, 2.94 | 0.264                |        | LRT p-value <b>0.002</b>                     |
|-----------------------------------------------------------------|-------------------------|------|------------|----------------------|--------|----------------------------------------------|
|                                                                 | Stage (III vs. II)      | 2.33 | 1.21, 4.48 | <b>0.011</b>         |        |                                              |
|                                                                 | pCR (pCR vs. RD)        | 0.34 | 0.15, 0.78 | <b>0.01</b>          |        |                                              |
|                                                                 | HER2-E vs. not          | 4.81 | 2.25, 10.3 | <b>&lt;0.001</b>     |        |                                              |
|                                                                 | TILs High vs. Low (40%) | 0.96 | 0.35, 2.63 | 0.942                |        | Model 4 vs. Model 3 LRT p-value 0.94         |
|                                                                 | Signature (continuous)  | 0.53 | 0.36, 0.78 | <b>0.001</b>         |        |                                              |
| <b>Signature: Immune1 TCGA.BRCA.1198 JCI.2020 PMID.32573490</b> |                         |      |            |                      |        |                                              |
| Model                                                           | Features                | HR   | 95% CI     | p-value <sup>1</sup> | AIC    | LR p-value <sup>2</sup>                      |
| <b>Model 1</b>                                                  | THL vs. TH              | 0.34 | 0.14, 0.78 | <b>0.011</b>         | 395.68 | -                                            |
|                                                                 | TL vs. TH               | 1.27 | 0.62, 2.60 | 0.511                |        |                                              |
|                                                                 | HR (pos vs. neg)        | 1.86 | 0.94, 3.69 | 0.076                |        |                                              |
|                                                                 | Stage (III vs. II)      | 2.03 | 1.07, 3.87 | <b>0.031</b>         |        |                                              |
|                                                                 | pCR (pCR vs. RD)        | 0.22 | 0.10, 0.48 | <b>&lt;0.001</b>     |        |                                              |
|                                                                 | HER2-E vs. Other        | 4.2  | 1.97, 8.96 | <b>&lt;0.001</b>     |        |                                              |
| <b>Model 2</b>                                                  | THL vs. TH              | 0.31 | 0.13, 0.73 | <b>0.007</b>         | 394.78 | Model 2 vs. Model 1 LRT p-value 0.09         |
|                                                                 | TL vs. TH               | 1.27 | 0.62, 2.61 | 0.513                |        |                                              |
|                                                                 | HR (pos vs. neg)        | 1.87 | 0.94, 3.73 | 0.076                |        |                                              |
|                                                                 | Stage (III vs. II)      | 1.92 | 1.01, 3.66 | <b>0.046</b>         |        |                                              |
|                                                                 | pCR (pCR vs. RD)        | 0.25 | 0.11, 0.54 | <b>&lt;0.001</b>     |        |                                              |
|                                                                 | HER2-E vs. not          | 4.51 | 2.10, 9.68 | <b>&lt;0.001</b>     |        |                                              |
|                                                                 | TILs High vs. Low (40%) | 0.49 | 0.20, 1.19 | 0.113                |        |                                              |
| <b>Model 3</b>                                                  | THL vs. TH              | 0.3  | 0.13, 0.71 | <b>0.006</b>         | 389.43 | Model 3 vs. Model 1 LRT p-value <b>0.004</b> |
|                                                                 | TL vs. TH               | 1.49 | 0.72, 3.11 | 0.285                |        |                                              |
|                                                                 | HR (pos vs. neg)        | 1.47 | 0.73, 2.95 | 0.282                |        |                                              |
|                                                                 | Stage (III vs. II)      | 2.1  | 1.10, 4.00 | <b>0.025</b>         |        |                                              |
|                                                                 | pCR (pCR vs. RD)        | 0.31 | 0.14, 0.71 | <b>0.005</b>         |        |                                              |
|                                                                 | HER2-E vs. not          | 4.41 | 2.07, 9.38 | <b>&lt;0.001</b>     |        |                                              |
|                                                                 | Signature (cont)        | 0.6  | 0.43, 0.85 | <b>0.004</b>         |        |                                              |
| <b>Model 4</b>                                                  | THL vs. TH              | 0.3  | 0.13, 0.70 | <b>0.005</b>         | 391.31 |                                              |

|                                                                    | TL vs. TH               | 1.48 | 0.71, 3.09 | 0.30                 |        | Model 4 vs. Model 2<br>LRT p-value <b>0.02</b>  |
|--------------------------------------------------------------------|-------------------------|------|------------|----------------------|--------|-------------------------------------------------|
|                                                                    | HR (pos vs. neg)        | 1.49 | 0.73, 3.00 | 0.271                |        |                                                 |
|                                                                    | Stage (III vs. II)      | 2.08 | 1.09, 3.97 | <b>0.027</b>         |        | Model 4 vs. Model 3<br>LRT p-value 0.73         |
|                                                                    | pCR (pCR vs. RD)        | 0.32 | 0.14, 0.71 | <b>0.006</b>         |        |                                                 |
|                                                                    | HER2-E vs. not          | 4.44 | 2.09, 9.46 | <b>&lt;0.001</b>     |        |                                                 |
|                                                                    | TILs High vs. Low (40%) | 0.84 | 0.30, 2.32 | 0.733                |        |                                                 |
|                                                                    | Signature (continuous)  | 0.62 | 0.42, 0.92 | <b>0.019</b>         |        |                                                 |
| <b>Signature: IgG Rody BreastCancerResearch.2008 PMID.19272155</b> |                         |      |            |                      |        |                                                 |
| Model                                                              | Features                | HR   | 95% CI     | p-value <sup>1</sup> | AIC    | LR p-value <sup>2</sup>                         |
| <b>Model 1</b>                                                     | THL vs. TH              | 0.34 | 0.14, 0.78 | <b>0.011</b>         | 395.68 | -                                               |
|                                                                    | TL vs. TH               | 1.27 | 0.62, 2.60 | 0.511                |        |                                                 |
|                                                                    | HR (pos vs. neg)        | 1.86 | 0.94, 3.69 | 0.076                |        |                                                 |
|                                                                    | Stage (III vs. II)      | 2.03 | 1.07, 3.87 | <b>0.031</b>         |        |                                                 |
|                                                                    | pCR (pCR vs. RD)        | 0.22 | 0.10, 0.48 | <b>&lt;0.001</b>     |        |                                                 |
|                                                                    | HER2-E vs. Other        | 4.2  | 1.97, 8.96 | <b>&lt;0.001</b>     |        |                                                 |
| <b>Model 2</b>                                                     | THL vs. TH              | 0.31 | 0.13, 0.73 | <b>0.007</b>         | 394.78 | Model 2 vs. Model 1<br>LRT p-value 0.09         |
|                                                                    | TL vs. TH               | 1.27 | 0.62, 2.61 | 0.513                |        |                                                 |
|                                                                    | HR (pos vs. neg)        | 1.87 | 0.94, 3.73 | 0.076                |        |                                                 |
|                                                                    | Stage (III vs. II)      | 1.92 | 1.01, 3.66 | <b>0.046</b>         |        |                                                 |
|                                                                    | pCR (pCR vs. RD)        | 0.25 | 0.11, 0.54 | <b>&lt;0.001</b>     |        |                                                 |
|                                                                    | HER2-E vs. not          | 4.51 | 2.10, 9.68 | <b>&lt;0.001</b>     |        |                                                 |
|                                                                    | TILs High vs. Low (40%) | 0.49 | 0.20, 1.19 | 0.113                |        |                                                 |
| <b>Model 3</b>                                                     | THL vs. TH              | 0.33 | 0.14, 0.76 | <b>0.009</b>         | 387.85 | Model 3 vs. Model 1<br>LRT p-value <b>0.002</b> |
|                                                                    | TL vs. TH               | 1.59 | 0.76, 3.32 | 0.217                |        |                                                 |
|                                                                    | HR (pos vs. neg)        | 1.52 | 0.76, 3.02 | 0.236                |        |                                                 |
|                                                                    | Stage (III vs. II)      | 2.3  | 1.20, 4.40 | <b>0.012</b>         |        |                                                 |
|                                                                    | pCR (pCR vs. RD)        | 0.31 | 0.14, 0.69 | <b>0.004</b>         |        |                                                 |
|                                                                    | HER2-E vs. not          | 4.71 | 2.20, 10.1 | <b>&lt;0.001</b>     |        |                                                 |
|                                                                    | Signature (cont)        | 0.57 | 0.41, 0.81 | <b>0.002</b>         |        |                                                 |

|                |                         |      |            |                  |        |                                                 |
|----------------|-------------------------|------|------------|------------------|--------|-------------------------------------------------|
| <b>Model 4</b> | THL vs. TH              | 0.32 | 0.14, 0.75 | <b>0.009</b>     | 389.76 | Model 4 vs. Model 2<br>LRT p-value <b>0.008</b> |
|                | TL vs. TH               | 1.57 | 0.75, 3.30 | 0.234            |        |                                                 |
|                | HR (pos vs. neg)        | 1.53 | 0.76, 3.06 | 0.229            |        |                                                 |
|                | Stage (III vs. II)      | 2.27 | 1.18, 4.37 | <b>0.014</b>     |        |                                                 |
|                | pCR (pCR vs. RD)        | 0.31 | 0.14, 0.69 | <b>0.004</b>     |        | Model 4 vs. Model 3<br>LRT p-value 0.77         |
|                | HER2-E vs. not          | 4.72 | 2.21, 10.1 | <b>&lt;0.001</b> |        |                                                 |
|                | TILs High vs. Low (40%) | 0.86 | 0.32, 2.34 | 0.77             |        |                                                 |
|                | Signature (continuous)  | 0.59 | 0.40, 0.87 | <b>0.007</b>     |        |                                                 |

CI: confident intervals; EFS: event-free survival; HR: hormone receptor; pCR: pathologic complete response; RD: residual disease; pos: positive; neg: negative; HER2-E: HER2-Enriched; AIC: Akaike Information Criterion; LR: likelihood-ratio test; TILs: tumor infiltrating lymphocytes; IgG: immunoglobulin G; T: weekly paclitaxel; H: trastuzumab; L: lapatinib. <sup>1</sup>Cox regression model p-value; <sup>2</sup>Likelihood-ratio test p-value.



**eTable 10. Landmark Analysis Week 30**

Association of tumor-infiltrating lymphocytes (TILs) as continuous variable and immune gene expression signatures (iGES) with event-free survival (EFS) in CALGB 40601: comparative analysis of nested multivariable Cox regression models.

| Signature: IGG.Cluster Fan BMC Med Genomics.2011 PMID.21214954 |                    |      |            |                      |        |                                                |
|----------------------------------------------------------------|--------------------|------|------------|----------------------|--------|------------------------------------------------|
| Model                                                          | Features           | HR   | 95% CI     | p-value <sup>1</sup> | AIC    | LR p-value <sup>2</sup>                        |
| <b>Model 1</b>                                                 | THL vs. TH         | 0.37 | 0.16, 0.87 | <b>0.02</b>          | 364.58 | -                                              |
|                                                                | TL vs. TH          | 1.34 | 0.63, 2.83 | 0.44                 |        |                                                |
|                                                                | HR (pos vs. neg)   | 2.13 | 1.03, 4.42 | <b>0.04</b>          |        |                                                |
|                                                                | Stage (III vs. II) | 1.95 | 0.99, 3.83 | 0.05                 |        |                                                |
|                                                                | pCR (pCR vs. RD)   | 0.2  | 0.09, 0.46 | <b>&lt;0.001</b>     |        |                                                |
|                                                                | HER2-E vs. Other   | 4.6  | 2.09, 10.1 | <b>&lt;0.001</b>     |        |                                                |
| <b>Model 2</b>                                                 | THL vs. TH         | 0.35 | 0.15, 0.83 | <b>0.02</b>          | 365.28 | Model 2 vs. Model 1<br>LRT p-value 0.25        |
|                                                                | TL vs. TH          | 1.36 | 0.64, 2.90 | 0.42                 |        |                                                |
|                                                                | HR (pos vs. neg)   | 2.15 | 1.03, 4.45 | <b>0.04</b>          |        |                                                |
|                                                                | Stage (III vs. II) | 1.89 | 0.96, 3.71 | 0.07                 |        |                                                |
|                                                                | pCR (pCR vs. RD)   | 0.22 | 0.10, 0.51 | <b>&lt;0.001</b>     |        |                                                |
|                                                                | HER2-E vs. not     | 4.9  | 2.21, 10.9 | <b>&lt;0.001</b>     |        |                                                |
|                                                                | TILs (continuous)  | 0.99 | 0.98, 1.01 | 0.27                 |        |                                                |
| <b>Model 3</b>                                                 | THL vs. TH         | 0.34 | 0.14, 0.81 | <b>0.015</b>         | 361.31 | Model 3 vs. Model 1<br>LRT p-value <b>0.02</b> |
|                                                                | TL vs. TH          | 1.54 | 0.71, 3.33 | 0.27                 |        |                                                |
|                                                                | HR (pos vs. neg)   | 1.71 | 0.81, 3.60 | 0.16                 |        |                                                |
|                                                                | Stage (III vs. II) | 1.95 | 0.99, 3.83 | 0.05                 |        |                                                |
|                                                                | pCR (pCR vs. RD)   | 0.27 | 0.11, 0.62 | <b>0.002</b>         |        |                                                |
|                                                                | HER2-E vs. not     | 4.6  | 2.10, 10.1 | <b>&lt;0.001</b>     |        |                                                |
|                                                                | Signature (cont)   | 0.67 | 0.47, 0.94 | <b>0.02</b>          |        |                                                |
| <b>Model 4</b>                                                 | THL vs. TH         | 0.35 | 0.14, 0.83 | <b>0.02</b>          | 363.27 | Model 4 vs. Model 2<br>LRT p-value <b>0.04</b> |
|                                                                | TL vs. TH          | 1.55 | 0.72, 3.36 | 0.27                 |        |                                                |
|                                                                | HR (pos vs. neg)   | 1.68 | 0.79, 3.59 | 0.18                 |        |                                                |
|                                                                | Stage (III vs. II) | 1.95 | 0.99, 3.85 | 0.05                 |        | Model 4 vs. Model 3<br>LRT p-value 0.84        |
|                                                                | pCR (pCR vs. RD)   | 0.26 | 0.11, 0.62 | <b>0.002</b>         |        |                                                |
|                                                                | HER2-E vs. not     | 4.55 | 2.07, 10.0 | <b>&lt;0.001</b>     |        |                                                |

|                                                                                | TILs (continuous)      | 1         | 0.98, 1.02    | 0.84                       |            |                                                |
|--------------------------------------------------------------------------------|------------------------|-----------|---------------|----------------------------|------------|------------------------------------------------|
|                                                                                | Signature (continuous) | 0.65      | 0.43, 0.99    | <b>0.04</b>                |            |                                                |
| <b>Signature: Plasma.cells ImSig.Nirmal CancerImmunoRes.2018 PMID.30266715</b> |                        |           |               |                            |            |                                                |
| <b>Model</b>                                                                   | <b>Features</b>        | <b>HR</b> | <b>95% CI</b> | <b>p-value<sup>1</sup></b> | <b>AIC</b> | <b>LR p-value<sup>2</sup></b>                  |
| <b>Model 1</b>                                                                 | THL vs. TH             | 0.37      | 0.16, 0.87    | <b>0.02</b>                | 364.58     | -                                              |
|                                                                                | TL vs. TH              | 1.34      | 0.63, 2.83    | 0.45                       |            |                                                |
|                                                                                | HR (pos vs. neg)       | 2.13      | 1.03, 4.42    | <b>0.04</b>                |            |                                                |
|                                                                                | Stage (III vs. II)     | 1.95      | 0.99, 3.83    | 0.05                       |            |                                                |
|                                                                                | pCR (pCR vs. RD)       | 0.2       | 0.09, 0.46    | <b>&lt;0.001</b>           |            |                                                |
|                                                                                | HER2-E vs. Other       | 4.6       | 2.09, 10.1    | <b>&lt;0.001</b>           |            |                                                |
| <b>Model 2</b>                                                                 | THL vs. TH             | 0.35      | 0.15, 0.83    | <b>0.02</b>                | 365.28     | Model 2 vs. Model 1<br>LRT p-value 0.25        |
|                                                                                | TL vs. TH              | 1.36      | 0.64, 2.90    | 0.42                       |            |                                                |
|                                                                                | HR (pos vs. neg)       | 2.15      | 1.03, 4.45    | <b>0.04</b>                |            |                                                |
|                                                                                | Stage (III vs. II)     | 1.89      | 0.96, 3.71    | 0.07                       |            |                                                |
|                                                                                | pCR (pCR vs. RD)       | 0.22      | 0.10, 0.51    | <b>&lt;0.001</b>           |            |                                                |
|                                                                                | HER2-E vs. not         | 4.9       | 2.21, 10.9    | <b>&lt;0.001</b>           |            |                                                |
|                                                                                | TILs (continuous)      | 0.99      | 0.98, 1.01    | 0.27                       |            |                                                |
| <b>Model 3</b>                                                                 | THL vs. TH             | 0.34      | 0.14, 0.80    | <b>0.01</b>                | 360.66     | Model 3 vs. Model 1<br>LRT p-value <b>0.02</b> |
|                                                                                | TL vs. TH              | 1.61      | 0.74, 3.49    | 0.23                       |            |                                                |
|                                                                                | HR (pos vs. neg)       | 2.11      | 1.02, 4.35    | <b>0.04</b>                |            |                                                |
|                                                                                | Stage (III vs. II)     | 1.96      | 1.00, 3.86    | 0.05                       |            |                                                |
|                                                                                | pCR (pCR vs. RD)       | 0.28      | 0.12, 0.66    | <b>0.004</b>               |            |                                                |
|                                                                                | HER2-E vs. not         | 5.58      | 2.47, 12.6    | <b>&lt;0.001</b>           |            |                                                |
|                                                                                | Signature (cont)       | 0.64      | 0.45, 0.91    | <b>0.01</b>                |            |                                                |
| <b>Model 4</b>                                                                 | THL vs. TH             | 0.34      | 0.14, 0.82    | <b>0.02</b>                | 362.61     | Model 4 vs. Model 2<br>LRT p-value <b>0.03</b> |
|                                                                                | TL vs. TH              | 1.62      | 0.74, 3.53    | 0.22                       |            |                                                |
|                                                                                | HR (pos vs. neg)       | 2.11      | 1.02, 4.34    | <b>0.04</b>                |            |                                                |
|                                                                                | Stage (III vs. II)     | 1.97      | 1.00, 3.89    | 0.05                       |            | Model 4 vs. Model 3<br>LRT p-value 0.81        |
|                                                                                | pCR (pCR vs. RD)       | 0.28      | 0.12, 0.66    | <b>0.004</b>               |            |                                                |
|                                                                                | HER2-E vs. not         | 5.59      | 2.47, 12.6    | <b>&lt;0.001</b>           |            |                                                |

|                                                                                    | TILs<br>(continuous)      | 1         | 0.98, 1.02    | 0.81                       |            |                                                 |
|------------------------------------------------------------------------------------|---------------------------|-----------|---------------|----------------------------|------------|-------------------------------------------------|
|                                                                                    | Signature<br>(continuous) | 0.62      | 0.41, 0.95    | <b>0.03</b>                |            |                                                 |
| <b>Signature: Bcells.Plasma.cells.52genes Miller GenomeBiol.2013 PMID.23618380</b> |                           |           |               |                            |            |                                                 |
| <b>Model</b>                                                                       | <b>Features</b>           | <b>HR</b> | <b>95% CI</b> | <b>p-value<sup>1</sup></b> | <b>AIC</b> | <b>LR p-value<sup>2</sup></b>                   |
| <b>Model 1</b>                                                                     | THL vs. TH                | 0.37      | 0.16, 0.87    | <b>0.02</b>                | 364.58     | -                                               |
|                                                                                    | TL vs. TH                 | 1.34      | 0.63, 2.83    | 0.45                       |            |                                                 |
|                                                                                    | HR (pos vs. neg)          | 2.13      | 1.03, 4.42    | <b>0.04</b>                |            |                                                 |
|                                                                                    | Stage (III vs. II)        | 1.95      | 0.99, 3.83    | 0.05                       |            |                                                 |
|                                                                                    | pCR (pCR vs. RD)          | 0.2       | 0.09, 0.46    | <b>&lt;0.001</b>           |            |                                                 |
|                                                                                    | HER2-E vs. Other          | 4.6       | 2.09, 10.1    | <b>&lt;0.001</b>           |            |                                                 |
| <b>Model 2</b>                                                                     | THL vs. TH                | 0.35      | 0.15, 0.83    | <b>0.02</b>                | 365.28     | Model 2 vs. Model 1<br>LRT p-value 0.25         |
|                                                                                    | TL vs. TH                 | 1.36      | 0.64, 2.90    | 0.42                       |            |                                                 |
|                                                                                    | HR (pos vs. neg)          | 2.15      | 1.03, 4.45    | <b>0.04</b>                |            |                                                 |
|                                                                                    | Stage (III vs. II)        | 1.89      | 0.96, 3.71    | 0.07                       |            |                                                 |
|                                                                                    | pCR (pCR vs. RD)          | 0.22      | 0.10, 0.51    | <b>&lt;0.001</b>           |            |                                                 |
|                                                                                    | HER2-E vs. not            | 4.9       | 2.21, 10.9    | <b>&lt;0.001</b>           |            |                                                 |
|                                                                                    | TILs (continuous)         | 0.99      | 0.98, 1.01    | 0.27                       |            |                                                 |
| <b>Model 3</b>                                                                     | THL vs. TH                | 0.33      | 0.14, 0.78    | <b>0.01</b>                | 357.02     | Model 3 vs. Model 1<br>LRT p-value <b>0.002</b> |
|                                                                                    | TL vs. TH                 | 1.68      | 0.78, 3.64    | 0.19                       |            |                                                 |
|                                                                                    | HR (pos vs. neg)          | 1.62      | 0.77, 3.38    | 0.20                       |            |                                                 |
|                                                                                    | Stage (III vs. II)        | 2.1       | 1.07, 4.13    | <b>0.03</b>                |            |                                                 |
|                                                                                    | pCR (pCR vs. RD)          | 0.3       | 0.13, 0.71    | <b>0.006</b>               |            |                                                 |
|                                                                                    | HER2-E vs. not            | 5         | 2.27, 11.0    | <b>&lt;0.001</b>           |            |                                                 |
|                                                                                    | Signature (cont)          | 0.56      | 0.39, 0.81    | <b>0.002</b>               |            |                                                 |
| <b>Model 4</b>                                                                     | THL vs. TH                | 0.34      | 0.14, 0.82    | <b>0.02</b>                | 358.57     | Model 4 vs. Model 2<br>LRT p-value <b>0.003</b> |
|                                                                                    | TL vs. TH                 | 1.74      | 0.80, 3.81    | 0.16                       |            |                                                 |
|                                                                                    | HR (pos vs. neg)          | 1.56      | 0.74, 3.27    | 0.239                      |            |                                                 |
|                                                                                    | Stage (III vs. II)        | 2.15      | 1.09, 4.24    | <b>0.03</b>                |            | Model 4 vs. Model 3<br>LRT p-value 0.51         |
|                                                                                    | pCR (pCR vs. RD)          | 0.29      | 0.12, 0.69    | <b>0.005</b>               |            |                                                 |
|                                                                                    | HER2-E vs. not            | 4.89      | 2.21, 10.8    | <b>&lt;0.001</b>           |            |                                                 |

|                                                             | TILs (continuous)      | 1.01      | 0.99, 1.03    | 0.50                       |            |                                                 |
|-------------------------------------------------------------|------------------------|-----------|---------------|----------------------------|------------|-------------------------------------------------|
|                                                             | Signature (continuous) | 0.52      | 0.34, 0.79    | <b>0.002</b>               |            |                                                 |
| <b>Signature: Ig TCGA.BRCA.1198 Cell.2015 PMID.26451490</b> |                        |           |               |                            |            |                                                 |
| <b>Model</b>                                                | <b>Features</b>        | <b>HR</b> | <b>95% CI</b> | <b>p-value<sup>1</sup></b> | <b>AIC</b> | <b>LR p-value<sup>2</sup></b>                   |
| <b>Model 1</b>                                              | THL vs. TH             | 0.37      | 0.16, 0.87    | <b>0.02</b>                | 364.58     | -                                               |
|                                                             | TL vs. TH              | 1.34      | 0.63, 2.83    | 0.45                       |            |                                                 |
|                                                             | HR (pos vs. neg)       | 2.13      | 1.03, 4.42    | <b>0.04</b>                |            |                                                 |
|                                                             | Stage (III vs. II)     | 1.95      | 0.99, 3.83    | 0.05                       |            |                                                 |
|                                                             | pCR (pCR vs. RD)       | 0.2       | 0.09, 0.46    | <b>&lt;0.001</b>           |            |                                                 |
|                                                             | HER2-E vs. Other       | 4.6       | 2.09, 10.1    | <b>&lt;0.001</b>           |            |                                                 |
| <b>Model 2</b>                                              | THL vs. TH             | 0.35      | 0.15, 0.83    | <b>0.02</b>                | 365.28     | Model 2 vs. Model 1<br>LRT p-value 0.25         |
|                                                             | TL vs. TH              | 1.36      | 0.64, 2.90    | 0.42                       |            |                                                 |
|                                                             | HR (pos vs. neg)       | 2.15      | 1.03, 4.45    | <b>0.04</b>                |            |                                                 |
|                                                             | Stage (III vs. II)     | 1.89      | 0.96, 3.71    | 0.07                       |            |                                                 |
|                                                             | pCR (pCR vs. RD)       | 0.22      | 0.10, 0.51    | <b>&lt;0.001</b>           |            |                                                 |
|                                                             | HER2-E vs. not         | 4.9       | 2.21, 10.9    | <b>&lt;0.001</b>           |            |                                                 |
|                                                             | TILs (continuous)      | 0.99      | 0.98, 1.01    | 0.27                       |            |                                                 |
| <b>Model 3</b>                                              | THL vs. TH             | 0.35      | 0.15, 0.83    | <b>0.02</b>                | 356.98     | Model 3 vs. Model 1<br>LRT p-value <b>0.002</b> |
|                                                             | TL vs. TH              | 1.81      | 0.83, 3.95    | 0.14                       |            |                                                 |
|                                                             | HR (pos vs. neg)       | 1.73      | 0.84, 3.59    | 0.14                       |            |                                                 |
|                                                             | Stage (III vs. II)     | 2.21      | 1.12, 4.37    | <b>0.02</b>                |            |                                                 |
|                                                             | pCR (pCR vs. RD)       | 0.31      | 0.13, 0.72    | <b>0.007</b>               |            |                                                 |
|                                                             | HER2-E vs. not         | 5.06      | 2.30, 11.1    | <b>&lt;0.001</b>           |            |                                                 |
|                                                             | Signature (cont)       | 0.56      | 0.39, 0.81    | <b>0.002</b>               |            |                                                 |
| <b>Model 4</b>                                              | THL vs. TH             | 0.36      | 0.15, 0.87    | <b>0.02</b>                | 358.58     | Model 4 vs. Model 2<br>LRT p-value <b>0.003</b> |
|                                                             | TL vs. TH              | 1.89      | 0.85, 4.17    | 0.12                       |            |                                                 |
|                                                             | HR (pos vs. neg)       | 1.7       | 0.82, 3.51    | 0.15                       |            |                                                 |
|                                                             | Stage (III vs. II)     | 2.29      | 1.15, 4.56    | <b>0.02</b>                |            | Model 4 vs. Model 3<br>LRT p-value 0.53         |
|                                                             | pCR (pCR vs. RD)       | 0.3       | 0.13, 0.71    | <b>0.006</b>               |            |                                                 |
|                                                             | HER2-E vs. not         | 4.97      | 2.25, 11.0    | <b>&lt;0.001</b>           |            |                                                 |

|                                                                 | TILs (continuous)      | 1.01      | 0.99, 1.02    | 0.52                       |            |                                                |
|-----------------------------------------------------------------|------------------------|-----------|---------------|----------------------------|------------|------------------------------------------------|
|                                                                 | Signature (continuous) | 0.52      | 0.34, 0.80    | <b>0.003</b>               |            |                                                |
| <b>Signature: Immune1 TCGA.BRCA.1198 JCI.2020 PMID.32573490</b> |                        |           |               |                            |            |                                                |
| <b>Model</b>                                                    | <b>Features</b>        | <b>HR</b> | <b>95% CI</b> | <b>p-value<sup>1</sup></b> | <b>AIC</b> | <b>LR p-value<sup>2</sup></b>                  |
| <b>Model 1</b>                                                  | THL vs. TH             | 0.37      | 0.16, 0.87    | <b>0.02</b>                | 364.58     | -                                              |
|                                                                 | TL vs. TH              | 1.34      | 0.63, 2.83    | 0.45                       |            |                                                |
|                                                                 | HR (pos vs. neg)       | 2.13      | 1.03, 4.42    | <b>0.04</b>                |            |                                                |
|                                                                 | Stage (III vs. II)     | 1.95      | 0.99, 3.83    | 0.05                       |            |                                                |
|                                                                 | pCR (pCR vs. RD)       | 0.2       | 0.09, 0.46    | <b>&lt;0.001</b>           |            |                                                |
|                                                                 | HER2-E vs. Other       | 4.6       | 2.09, 10.1    | <b>&lt;0.001</b>           |            |                                                |
| <b>Model 2</b>                                                  | THL vs. TH             | 0.35      | 0.15, 0.83    | <b>0.02</b>                | 365.28     | Model 2 vs. Model 1<br>LRT p-value 0.25        |
|                                                                 | TL vs. TH              | 1.36      | 0.64, 2.90    | 0.42                       |            |                                                |
|                                                                 | HR (pos vs. neg)       | 2.15      | 1.03, 4.45    | <b>0.04</b>                |            |                                                |
|                                                                 | Stage (III vs. II)     | 1.89      | 0.96, 3.71    | 0.07                       |            |                                                |
|                                                                 | pCR (pCR vs. RD)       | 0.22      | 0.10, 0.51    | <b>&lt;0.001</b>           |            |                                                |
|                                                                 | HER2-E vs. not         | 4.9       | 2.21, 10.9    | <b>&lt;0.001</b>           |            |                                                |
|                                                                 | TILs (continuous)      | 0.99      | 0.98, 1.01    | 0.27                       |            |                                                |
| <b>Model 3</b>                                                  | THL vs. TH             | 0.34      | 0.14, 0.80    | <b>0.01</b>                | 360.55     | Model 3 vs. Model 1<br>LRT p-value <b>0.01</b> |
|                                                                 | TL vs. TH              | 1.59      | 0.74, 3.45    | 0.24                       |            |                                                |
|                                                                 | HR (pos vs. neg)       | 1.73      | 0.83, 3.63    | 0.14                       |            |                                                |
|                                                                 | Stage (III vs. II)     | 2.02      | 1.02, 3.97    | <b>0.04</b>                |            |                                                |
|                                                                 | pCR (pCR vs. RD)       | 0.28      | 0.12, 0.66    | <b>0.004</b>               |            |                                                |
|                                                                 | HER2-E vs. not         | 4.73      | 2.16, 10.4    | <b>&lt;0.001</b>           |            |                                                |
|                                                                 | Signature (cont)       | 0.64      | 0.44, 0.91    | <b>0.01</b>                |            |                                                |
| <b>Model 4</b>                                                  | THL vs. TH             | 0.34      | 0.14, 0.83    | <b>0.02</b>                | 362.40     | Model 4 vs. Model 2<br>LRT p-value <b>0.03</b> |
|                                                                 | TL vs. TH              | 1.62      | 0.75, 3.52    | 0.22                       |            |                                                |
|                                                                 | HR (pos vs. neg)       | 1.69      | 0.80, 3.57    | 0.17                       |            |                                                |
|                                                                 | Stage (III vs. II)     | 2.04      | 1.03, 4.04    | <b>0.04</b>                |            | Model 4 vs. Model 3<br>LRT p-value 0.70        |
|                                                                 | pCR (pCR vs. RD)       | 0.28      | 0.12, 0.66    | <b>0.003</b>               |            |                                                |
|                                                                 | HER2-E vs. not         | 4.64      | 2.11, 10.2    | <b>&lt;0.001</b>           |            |                                                |

|                                                                    | TILs (continuous)      | 1         | 0.98, 1.02    | 0.70                       |            |                                                 |
|--------------------------------------------------------------------|------------------------|-----------|---------------|----------------------------|------------|-------------------------------------------------|
|                                                                    | Signature (continuous) | 0.6       | 0.39, 0.94    | <b>0.03</b>                |            |                                                 |
| <b>Signature: IgG Rody BreastCancerResearch.2008 PMID.19272155</b> |                        |           |               |                            |            |                                                 |
| <b>Model</b>                                                       | <b>Features</b>        | <b>HR</b> | <b>95% CI</b> | <b>p-value<sup>1</sup></b> | <b>AIC</b> | <b>LR p-value<sup>2</sup></b>                   |
| <b>Model 1</b>                                                     | THL vs. TH             | 0.37      | 0.16, 0.87    | <b>0.02</b>                | 364.58     | -                                               |
|                                                                    | TL vs. TH              | 1.34      | 0.63, 2.83    | 0.45                       |            |                                                 |
|                                                                    | HR (pos vs. neg)       | 2.13      | 1.03, 4.42    | <b>0.04</b>                |            |                                                 |
|                                                                    | Stage (III vs. II)     | 1.95      | 0.99, 3.83    | 0.05                       |            |                                                 |
|                                                                    | pCR (pCR vs. RD)       | 0.2       | 0.09, 0.46    | <b>&lt;0.001</b>           |            |                                                 |
|                                                                    | HER2-E vs. Other       | 4.6       | 2.09, 10.1    | <b>&lt;0.001</b>           |            |                                                 |
| <b>Model 2</b>                                                     | THL vs. TH             | 0.35      | 0.15, 0.83    | <b>0.02</b>                | 365.28     | Model 2 vs. Model 1<br>LRT p-value 0.25         |
|                                                                    | TL vs. TH              | 1.36      | 0.64, 2.90    | 0.42                       |            |                                                 |
|                                                                    | HR (pos vs. neg)       | 2.15      | 1.03, 4.45    | <b>0.04</b>                |            |                                                 |
|                                                                    | Stage (III vs. II)     | 1.89      | 0.96, 3.71    | 0.07                       |            |                                                 |
|                                                                    | pCR (pCR vs. RD)       | 0.22      | 0.10, 0.51    | <b>&lt;0.001</b>           |            |                                                 |
|                                                                    | HER2-E vs. not         | 4.9       | 2.21, 10.9    | <b>&lt;0.001</b>           |            |                                                 |
|                                                                    | TILs (continuous)      | 0.99      | 0.98, 1.01    | 0.27                       |            |                                                 |
| <b>Model 3</b>                                                     | THL vs. TH             | 0.36      | 0.15, 0.86    | <b>0.02</b>                | 359.43     | Model 3 vs. Model 1<br>LRT p-value <b>0.007</b> |
|                                                                    | TL vs. TH              | 1.69      | 0.78, 3.67    | 0.18                       |            |                                                 |
|                                                                    | HR (pos vs. neg)       | 1.79      | 0.86, 3.71    | 0.12                       |            |                                                 |
|                                                                    | Stage (III vs. II)     | 2.19      | 1.11, 4.31    | <b>0.02</b>                |            |                                                 |
|                                                                    | pCR (pCR vs. RD)       | 0.28      | 0.12, 0.65    | <b>0.003</b>               |            |                                                 |
|                                                                    | HER2-E vs. not         | 4.97      | 2.26, 10.9    | <b>&lt;0.001</b>           |            |                                                 |
|                                                                    | Signature (cont)       | 0.61      | 0.43, 0.87    | <b>0.007</b>               |            |                                                 |
| <b>Model 4</b>                                                     | THL vs. TH             | 0.37      | 0.15, 0.88    | <b>0.03</b>                | 361.35     | Model 4 vs. Model 2<br>LRT p-value <b>0.02</b>  |
|                                                                    | TL vs. TH              | 1.72      | 0.79, 3.75    | 0.17                       |            |                                                 |
|                                                                    | HR (pos vs. neg)       | 1.77      | 0.85, 3.68    | 0.13                       |            |                                                 |
|                                                                    | Stage (III vs. II)     | 2.22      | 1.11, 4.42    | <b>0.02</b>                |            | Model 4 vs. Model 3<br>LRT p-value 0.78         |
|                                                                    | pCR (pCR vs. RD)       | 0.28      | 0.12, 0.65    | <b>0.003</b>               |            |                                                 |
|                                                                    | HER2-E vs. not         | 4.93      | 2.24, 10.9    | <b>&lt;0.001</b>           |            |                                                 |

|  |                           |      |            |             |  |  |
|--|---------------------------|------|------------|-------------|--|--|
|  | TILs<br>(continuous)      | 1    | 0.98, 1.02 | 0.78        |  |  |
|  | Signature<br>(continuous) | 0.59 | 0.39, 0.90 | <b>0.01</b> |  |  |

CI: confident intervals; EFS: event-free survival; HR: hormone receptor; pCR: in-breast pathologic complete response; RD: residual disease; pos: positive; neg: negative; HER2-E: HER2-Enriched; AIC: Akaike Information Criterion; LR: likelihood-ratio test; TILs: tumor infiltrating lymphocytes; IgG: immunoglobulin G; T: weekly paclitaxel; H: trastuzumab; L: lapatinib. <sup>1</sup>Cox regression model p-value; <sup>2</sup>Likelihood-ratio test p-value.

**eTable 11. Summary Table of Akaike Information Criteria (AIC) and C-Index From Multivariable Cox Models Including Immune Gene Expression Signatures (iGES)**

| <b>iGES ID</b>                                                      | <b>AIC</b> | <b>c-index</b> |
|---------------------------------------------------------------------|------------|----------------|
| IGG.Cluster Fan BMCMedGenomics.2011<br>PMID.21214954                | 389.97     | 0.76           |
| Plasma.cells ImSig.Nirmal<br>CancerImmunolRes.2018 PMID.30266715    | 388.34     | 0.73           |
| Bcells.Plasma.cells.52genes Miller<br>GenomeBiol.2013 PMID.23618380 | 385.04     | 0.77           |
| Ig TCGA.BRCA.1198 Cell.2015 PMID.26451490                           | 384.82     | 0.77           |
| Immune1 TCGA.BRCA.1198 JCI.2020<br>PMID.32573490                    | 389.43     | 0.74           |
| IgG Rody BreastCancerResearch.2008<br>PMID.19272155                 | 387.85     | 0.74           |

A median c-index was calculated for each model using 5-folds cross validation.



## eReferences

1. Andres-Terre M, McGuire HM, Pouliot Y, et al: Integrated, Multi-cohort Analysis Identifies Conserved Transcriptional Signatures across Multiple Respiratory Viruses. *Immunity* 43:1199-211, 2015
2. Beck AH, Espinosa I, Edris B, et al: The macrophage colony-stimulating factor 1 response signature in breast carcinoma. *Clin Cancer Res* 15:778-87, 2009
3. Bindea G, Mlecnik B, Tosolini M, et al: Spatiotemporal dynamics of intratumoral immune cells reveal the immune landscape in human cancer. *Immunity* 39:782-95, 2013
4. Broz ML, Binnewies M, Boldajipour B, et al: Dissecting the tumor myeloid compartment reveals rare activating antigen-presenting cells critical for T cell immunity. *Cancer Cell* 26:638-52, 2014
5. Cabrita R, Lauss M, Sanna A, et al: Tertiary lymphoid structures improve immunotherapy and survival in melanoma. *Nature* 577:561-565, 2020
6. Calabro A, Beissbarth T, Kuner R, et al: Effects of infiltrating lymphocytes and estrogen receptor on gene expression and prognosis in breast cancer. *Breast Cancer Res Treat* 116:69-77, 2009
7. Chang HY, Sneddon JB, Alizadeh AA, et al: Gene expression signature of fibroblast serum response predicts human cancer progression: similarities between tumors and wounds. *PLoS Biol* 2:E7, 2004
8. Charoentong P, Finotello F, Angelova M, et al: Pan-cancer Immunogenomic Analyses Reveal Genotype-Immunophenotype Relationships and Predictors of Response to Checkpoint Blockade. *Cell Rep* 18:248-262, 2017
9. Ciriello G, Gatza ML, Beck AH, et al: Comprehensive Molecular Portraits of Invasive Lobular Breast Cancer. *Cell* 163:506-19, 2015
10. Cristescu R, Mogg R, Ayers M, et al: Pan-tumor genomic biomarkers for PD-1 checkpoint blockade-based immunotherapy. *Science* 362, 2018
11. Dybkaer K, Bogsted M, Falgreen S, et al: Diffuse large B-cell lymphoma classification system that associates normal B-cell subset phenotypes with prognosis. *J Clin Oncol* 33:1379-88, 2015
12. Fan C, Prat A, Parker JS, et al: Building prognostic models for breast cancer patients using clinical variables and hundreds of gene expression signatures. *BMC Med Genomics* 4:3, 2011
13. Forero A, Li Y, Chen D, et al: Expression of the MHC Class II Pathway in Triple-Negative Breast Cancer Tumor Cells Is Associated with a Good Prognosis and Infiltrating Lymphocytes. *Cancer Immunol Res* 4:390-9, 2016
14. Garber ME, Saldanha A, Parker JS, et al: A B-Cell Gene Signature Correlates With the Extent of Gluten-Induced Intestinal Injury in Celiac Disease. *Cell Mol Gastroenterol Hepatol* 4:1-17, 2017
15. Garcia-Recio S, Thennavan A, East MP, et al: FGFR4 regulates tumor subtype differentiation in luminal breast cancer and metastatic disease. *J Clin Invest* 130:4871-4887, 2020
16. Gatza ML, Lucas JE, Barry WT, et al: A pathway-based classification of human breast cancer. *Proc Natl Acad Sci U S A* 107:6994-9, 2010

17. Ghassabeh GH, De Baetselier P, Brys L, et al: Identification of a common gene signature for type II cytokine-associated myeloid cells elicited in vivo in different pathologic conditions. *Blood* 108:575-83, 2006
18. Helmink BA, Reddy SM, Gao J, et al: B cells and tertiary lymphoid structures promote immunotherapy response. *Nature* 577:549-555, 2020
19. Heng YJ, Lester SC, Tse GM, et al: The molecular basis of breast cancer pathological phenotypes. *J Pathol* 241:375-391, 2017
20. Hollern DP, Xu N, Thennavan A, et al: B Cells and T Follicular Helper Cells Mediate Response to Checkpoint Inhibitors in High Mutation Burden Mouse Models of Breast Cancer. *Cell* 179:1191-1206 e21, 2019
21. Iglesia MD, Vincent BG, Parker JS, et al: Prognostic B-cell signatures using mRNA-seq in patients with subtype-specific breast and ovarian cancer. *Clin Cancer Res* 20:3818-29, 2014
22. Janiszewska M, Tabassum DP, Castano Z, et al: Subclonal cooperation drives metastasis by modulating local and systemic immune microenvironments. *Nat Cell Biol* 21:879-888, 2019
23. Kardos J, Chai S, Mose LE, et al: Claudin-low bladder tumors are immune infiltrated and actively immune suppressed. *JCI Insight* 1:e85902, 2016
24. Lauss M, Donia M, Harbst K, et al: Mutational and putative neoantigen load predict clinical benefit of adoptive T cell therapy in melanoma. *Nat Commun* 8:1738, 2017
25. Lin W, Cerny D, Chua E, et al: Human regulatory B cells combine phenotypic and genetic hallmarks with a distinct differentiation fate. *J Immunol* 193:2258-66, 2014
26. Nagalla S, Chou JW, Willingham MC, et al: Interactions between immunity, proliferation and molecular subtype in breast cancer prognosis. *Genome Biol* 14:R34, 2013
27. Newman AM, Liu CL, Green MR, et al: Robust enumeration of cell subsets from tissue expression profiles. *Nat Methods* 12:453-7, 2015
28. Nirmal AJ, Regan T, Shih BB, et al: Immune Cell Gene Signatures for Profiling the Microenvironment of Solid Tumors. *Cancer Immunol Res* 6:1388-1400, 2018
29. Pare L, Pascual T, Segui E, et al: Association between PD1 mRNA and response to anti-PD1 monotherapy across multiple cancer types. *Ann Oncol* 29:2121-2128, 2018
30. Pauken KE, Sammons MA, Odorizzi PM, et al: Epigenetic stability of exhausted T cells limits durability of reinvigoration by PD-1 blockade. *Science* 354:1160-1165, 2016
31. Perez EA, Thompson EA, Ballman KV, et al: Genomic analysis reveals that immune function genes are strongly linked to clinical outcome in the North Central Cancer Treatment Group n9831 Adjuvant Trastuzumab Trial. *J Clin Oncol* 33:701-8, 2015
32. Petitprez F, de Reynies A, Keung EZ, et al: B cells are associated with survival and immunotherapy response in sarcoma. *Nature* 577:556-560, 2020
33. Rody A, Holtrich U, Pusztai L, et al: T-cell metagene predicts a favorable prognosis in estrogen receptor-negative and HER2-positive breast cancers. *Breast Cancer Res* 11:R15, 2009
34. Rooney MS, Shukla SA, Wu CJ, et al: Molecular and genetic properties of tumors associated with local immune cytolytic activity. *Cell* 160:48-61, 2015

35. Savas P, Virassamy B, Ye C, et al: Single-cell profiling of breast cancer T cells reveals a tissue-resident memory subset associated with improved prognosis. *Nat Med* 24:986-993, 2018
36. Schlecker E, Stojanovic A, Eisen C, et al: Tumor-infiltrating monocytic myeloid-derived suppressor cells mediate CCR5-dependent recruitment of regulatory T cells favoring tumor growth. *J Immunol* 189:5602-11, 2012
37. Shay T, Jojic V, Zuk O, et al: Conservation and divergence in the transcriptional programs of the human and mouse immune systems. *Proc Natl Acad Sci U S A* 110:2946-51, 2013
38. Subramanian A, Tamayo P, Mootha VK, et al: Gene set enrichment analysis: a knowledge-based approach for interpreting genome-wide expression profiles. *Proc Natl Acad Sci U S A* 102:15545-50, 2005
39. Thorsson V, Gibbs DL, Brown SD, et al: The Immune Landscape of Cancer. *Immunity* 48:812-830 e14, 2018
40. Wolf DM, Lenburg ME, Yau C, et al: Gene co-expression modules as clinically relevant hallmarks of breast cancer diversity. *PLoS One* 9:e88309, 2014
41. Yoshihara K, Shahmoradgoli M, Martinez E, et al: Inferring tumour purity and stromal and immune cell admixture from expression data. *Nat Commun* 4:2612, 2013
42. Youn JI, Collazo M, Shalova IN, et al: Characterization of the nature of granulocytic myeloid-derived suppressor cells in tumor-bearing mice. *J Leukoc Biol* 91:167-81, 2012
43. Zhu G, Falahat R, Wang K, et al: Tumor-Associated Tertiary Lymphoid Structures: Gene-Expression Profiling and Their Bioengineering. *Front Immunol* 8:767, 2017
